# Supplementary material for: Mechanism and stereoselectivity of benzylic C–H hydroxylation by Ru–porphyrin: a computational study
Source: Royal Society of Chemistry journal article supplement (doi:10.1039/c9ob02415h), 2019-12-09
Supplement: c9ob02415h1.pdf [file c9ob02415h1.pdf]

## *Supporting Information*

### **Mechanism and Stereoselectivity of Benzylic C–H Hydroxylation by Ru-Porphyrin: A Computational Study**

Xiahe Chen, Qunmin Wang, Haimin Shen, Guijie Li, Yun-Fang Yang\*, and Yuan-Bin She\*

College of Chemical Engineering, Zhejiang University of Technology, Hangzhou, Zhejiang  
310014, China

\*E-mail: sheyb@zjut.edu.cn

\*E-mail: yangyf@zjut.edu.cn

### **Table of Contents**

|                                                                                                                     |    |
|---------------------------------------------------------------------------------------------------------------------|----|
| The calculated free energies of benzylic C–H hydroxylation by $^1\text{RuO}_2$ using different functionals<br>..... | S2 |
| The spin density calculated at the UM06/6-31G(d)-LANL2DZ level of theory .....                                      | S2 |
| The $\langle S^2 \rangle$ calculated at the UM06/6-31G(d)-LANL2DZ level of theory .....                             | S3 |
| The geometry scan along the C–O rebound reaction coordinates .....                                                  | S3 |
| Optimized $\sigma$ - and $\pi$ -pathways transition structures .....                                                | S4 |
| Gibbs free energy profiles for Ru(por <sup>*</sup> )O <sub>2</sub> -catalyzed C–H hydroxylation .....               | S4 |
| The conformational analysis for the hydrogen-atom abstraction transition structures .....                           | S5 |
| Optimized transition-state structures of $S\_1\text{TS1(M06)}$ and $R\_1\text{TS1(M06)}$ .....                      | S6 |
| Energies, enthalpies, and free energies of calculated structures .....                                              | S6 |
| Cartesian coordinates of the structures .....                                                                       | S7 |

**Table S1. The Calculated Free Energies of Benzylic C–H Hydroxylation by  $^1\text{RuO}_2$  using Different Functionals<sup>a</sup>**

| Functionals           | $^1\text{TS1(OSS)}$ | $^1\text{INT(OSS)}$ | $^1\text{TS2(OSS)}$ |
|-----------------------|---------------------|---------------------|---------------------|
| UM06//UB3LYP          | 19.6                | -0.3                | 0.2                 |
| UB97D// UB97D         | 15.2                | 8.4                 | 9.4                 |
| UB3LYP-D3// UB3LYP-D3 | 15.6                | 0.9                 | 3.0                 |

<sup>a</sup>In method of DFT1//DFT2, the molecular geometries were optimized using the DFT2 functional and a mixed basis set of LANL2DZ for Ru and 6-31G(d) for other atoms in the gas-phase, single-point energies were computed at the DFT1/6-311+G(d,p)-SDD(SMD<sub>Dichloromethane</sub>) level of the theory on the gas-phase optimized geometries. The energies are shown in kcal/mol.

OSS is open-shell singlet.

**Table S2. The Spin Density ( $\zeta$ ) for the Reaction Species Calculated at the UM06/6-31G(d)-LANL2DZ Level of Theory**

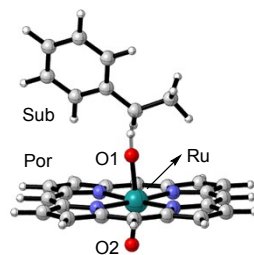

| Structures                                        | $\zeta_{\text{Ru}}$ | $\zeta_{\text{O1}}$ | $\zeta_{\text{O2}}$ | $\zeta_{\text{Por}}$ | $\zeta_{\text{Sub}}$ |
|---------------------------------------------------|---------------------|---------------------|---------------------|----------------------|----------------------|
| $^1\text{RuO}_2(\text{OSS})$                      | 0.0                 | 0.6                 | -0.6                | 0.0                  | —                    |
| $^1\text{TS1(OSS)}$                               | -0.4                | 0.3                 | -0.6                | 0.0                  | 0.7                  |
| $^1\text{TS1}\sigma'(\text{OSS})$                 | -0.3                | 0.5                 | -0.6                | 0.0                  | 0.4                  |
| $^1\text{INT(OSS)}$                               | -0.5                | 0.1                 | -0.6                | 0.0                  | 1.0                  |
| $^1\text{TS2(OSS)}$                               | -0.2                | -0.2                | -0.2                | 0.0                  | 0.6                  |
| $^1\text{RuO(OSS)}$                               | 0.0                 | —                   | 0.0                 | 0.0                  | —                    |
| $^3\text{RuO}_2$                                  | 0.3                 | 1.1                 | 0.6                 | 0.0                  | —                    |
| $^3\text{TS1}$                                    | 0.4                 | 0.4                 | 0.6                 | 0.0                  | 0.6                  |
| $^3\text{INT}$                                    | 0.5                 | -0.1                | 0.6                 | 0.0                  | 1.0                  |
| $^3\text{TS2}$                                    | 0.5                 | -0.1                | 0.6                 | 0.0                  | 1.0                  |
| $^3\text{RuO}$                                    | 1.1                 | —                   | 0.8                 | 0.1                  | —                    |
| $^5\text{RuO}_2$                                  | 1.0                 | 1.3                 | 1.1                 | 0.6                  | —                    |
| $^1\text{Ru}(\text{por}^*)\text{O}_2(\text{OSS})$ | 0.0                 | 0.8                 | -0.8                | 0.0                  | —                    |
| S_ $^1\text{TS1(OSS)}$                            | -0.3                | 0.6                 | -0.7                | 0.0                  | 0.4                  |
| R_ $^1\text{TS1(OSS)}$                            | -0.3                | 0.5                 | -0.7                | 0.0                  | 0.5                  |
| S_ $^1\text{INT(OSS)}$                            | -0.4                | 0.1                 | -0.6                | 0.0                  | 0.9                  |

|                             |      |     |      |     |      |
|-----------------------------|------|-----|------|-----|------|
| R_ <sup>1</sup> INT(OSS)    | -0.4 | 0.1 | -0.6 | 0.0 | 0.9  |
| S_ <sup>1</sup> TS2(OSS)    | 0.4  | 0.1 | 0.4  | 0.0 | -0.9 |
| R_ <sup>1</sup> TS2(OSS)    | -0.4 | 0.0 | -0.4 | 0.0 | 0.8  |
| <sup>1</sup> Ru(por*)O(OSS) | 0.0  | —   | 0.0  | 0.0 | —    |

OSS is open-shell singlet.

**Table S3.** The  $\langle S^2 \rangle$  for the triplet and quintet Species Calculated at the UM06/6-31G(d)-LANL2DZ Level of Theory

| Structures                    | $\langle S^2 \rangle$ | Structures                    | $\langle S^2 \rangle$ |
|-------------------------------|-----------------------|-------------------------------|-----------------------|
| <sup>3</sup> RuO <sub>2</sub> | 2.0003                | <sup>3</sup> TS2              | 2.0051                |
| <sup>3</sup> TS1              | 2.0005                | <sup>3</sup> RuO              | 2.0001                |
| <sup>3</sup> INT              | 2.0051                | <sup>5</sup> RuO <sub>2</sub> | 6.0006                |

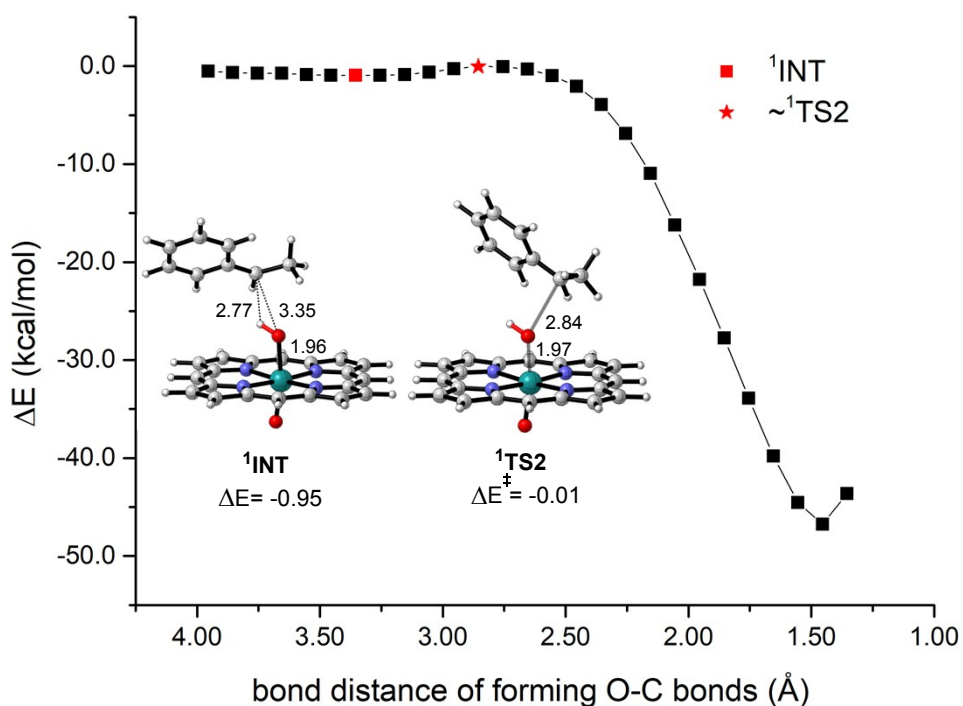

**Figure S1.** Geometry scans starting from <sup>1</sup>INT to form the 1-phenylethanol product. Calculations were done at the UB3LYP/6-31G(d)-LANL2DZ level of theory. The distances are shown in Å.

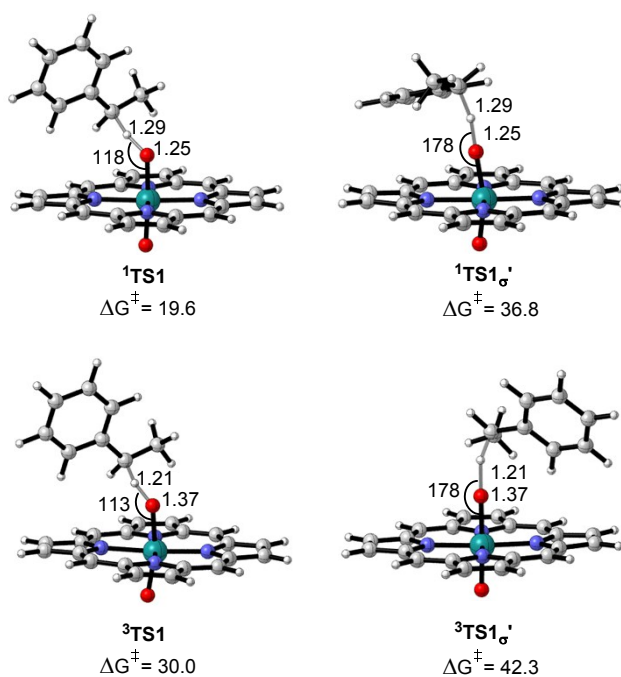

**Figure S2.** Optimized  $\sigma$ - and  $\pi$ -pathways transition structures. Calculations were done at the UM06/6-311+G(d,p)-SDD(SMD<sub>Dichloromethane</sub>)/UM06/6-31G(d)-LANL2DZ level of theory. The distances are shown in Å. The angles are shown in degrees, and energies are shown in kcal/mol.

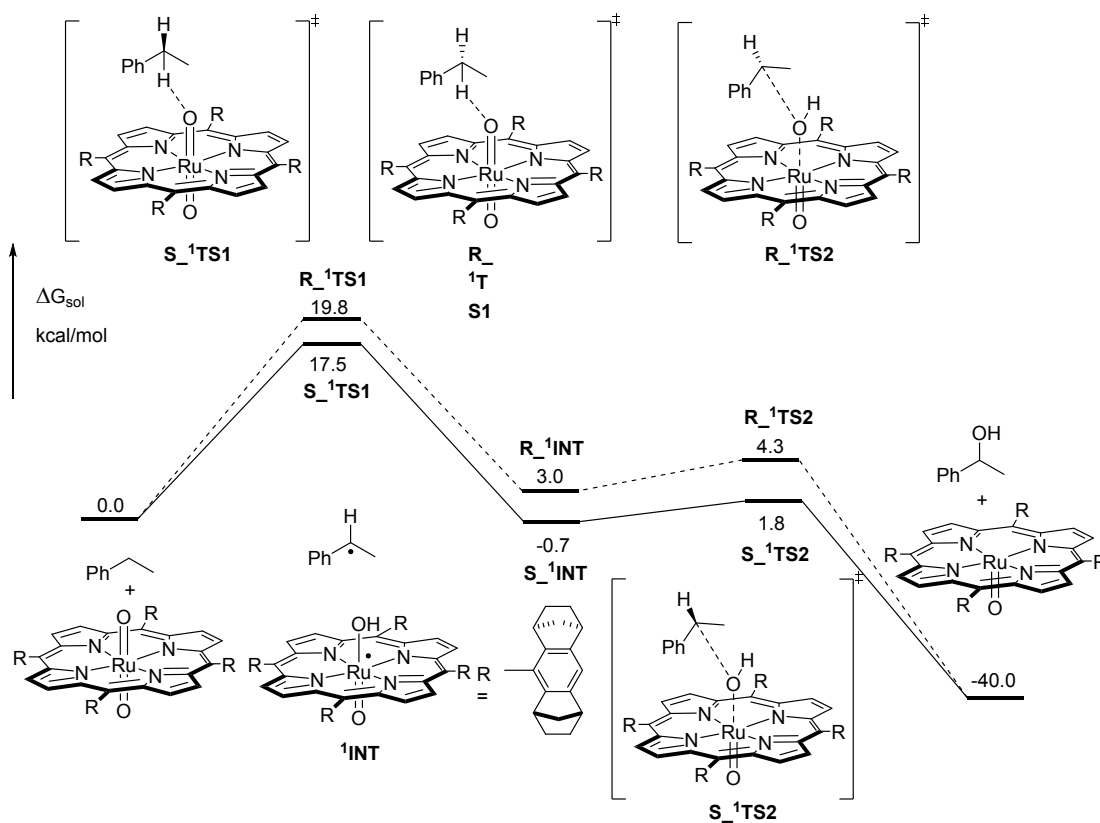

**Figure S3.** Gibbs free energy profiles for benzylic C–H hydroxylation with experimental chiral Ru-porphyrin ( $\text{Ru}(\text{por}^*)\text{O}_2$ ) using ONIOM (UM06/6-311+G(d,p)-SDD:UFF

(SMD<sub>Dichloromethane</sub>)/UM06/6-31G(d)-LANL2DZ:UFF) level of theory.

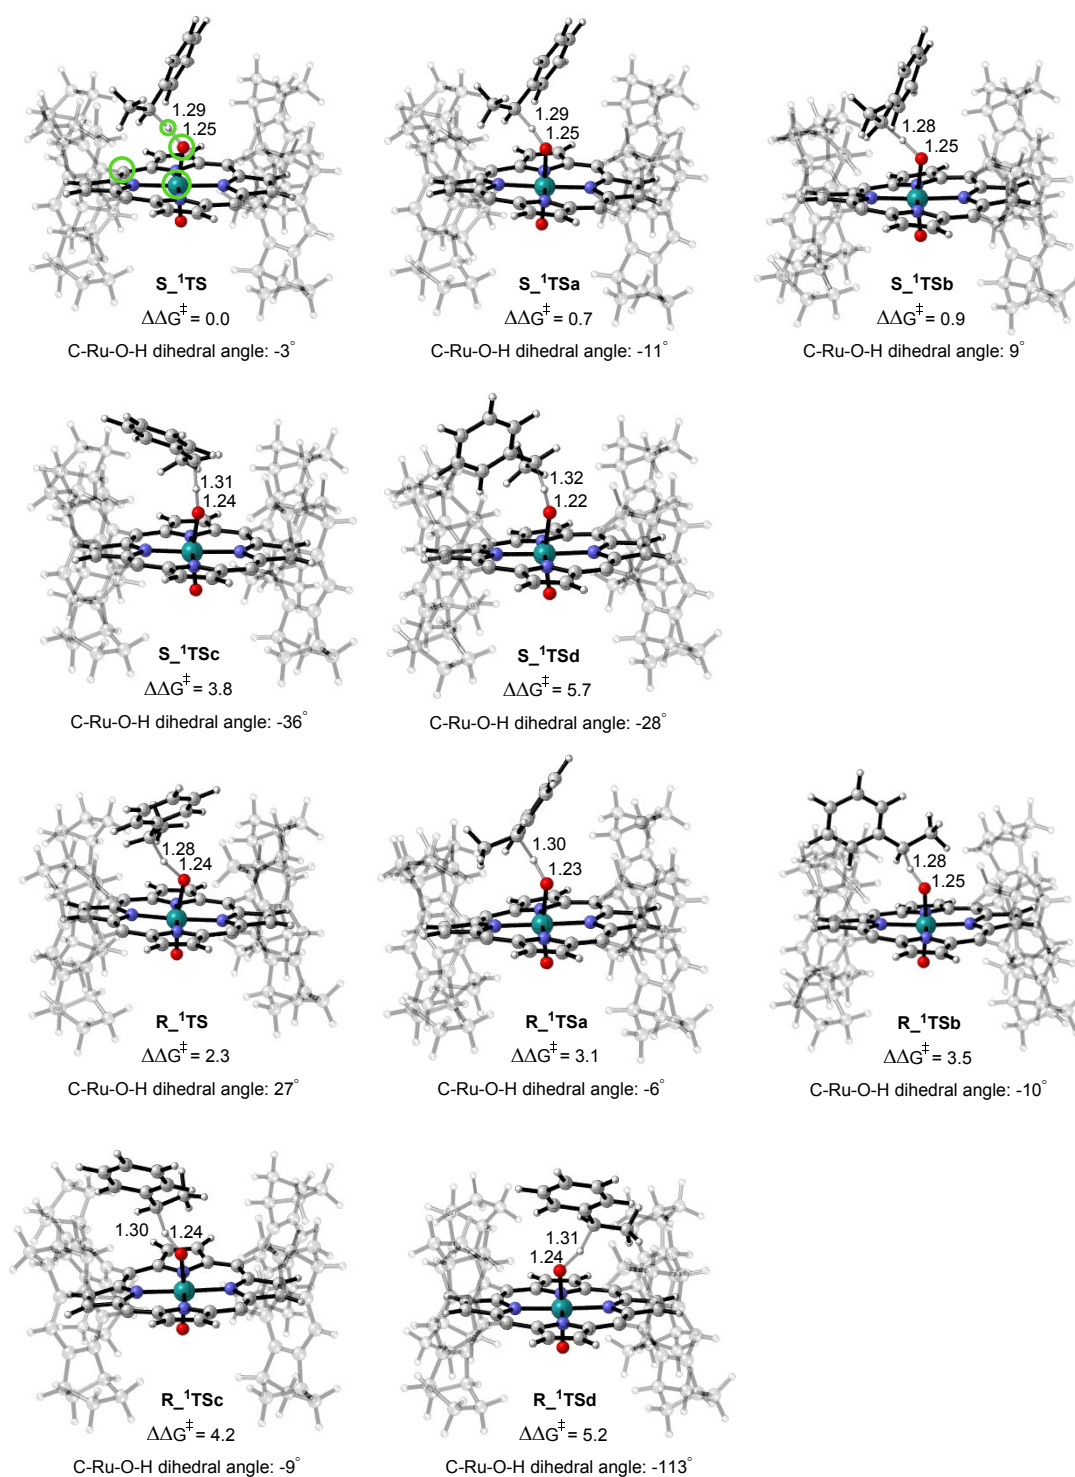

**Figure S4.** Different conformers for the hydrogen-atom abstraction transition structures. The distances are shown in Å. The energies are shown in kcal/mol. Calculations are based on ONIOM (UM06/6-311+G(d,p)-SDD:UFF(SMD<sub>Dichloromethane</sub>)/UM06/6-31G(d)-LANL2DZ:UFF) level of theory.

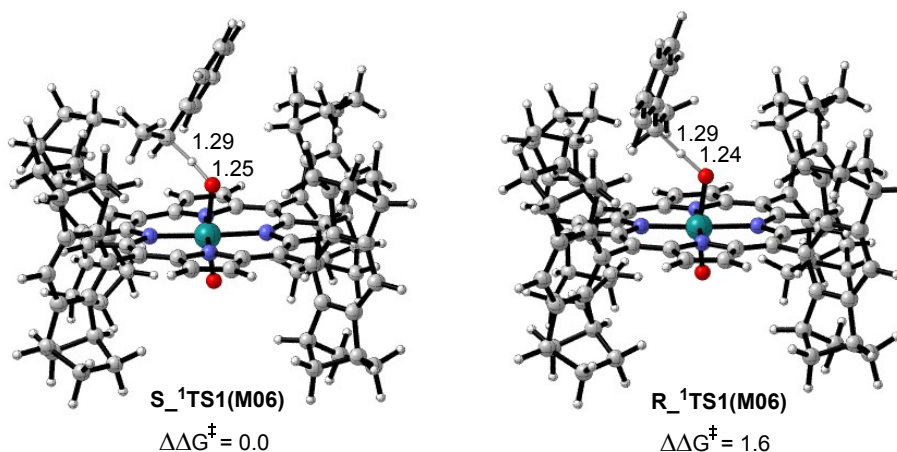

**Figure S5.** Optimized transition-state structures of  $S_1TS1(M06)$  and  $R_1TS1(M06)$ . The distances are shown in Å. The energies are shown in kcal/mol. Calculations are based on UM06/6-31G(d)-LANL2DZ(SMD<sub>Dichloromethane</sub>)/UM06/6-31G(d)-LANL2DZ level of theory.

**Table S4. Electronic Energies, Enthalpies, and Free Energies (in Hartree) of the Structures Calculated at the (U)M06/6-311+G(d,p)-SDD(SMD<sub>Dichloromethane</sub>)/ (U)M06/6-31G(d)-LANL2DZ Level of Theory**

| Structures      | ZPVE     | TCE      | TCH      | TCG      | $E_{sol}$      | $G_{sol}(E_{sol}+TCG)$ | Imaginary<br>Frequenc<br>y | $\Delta G_{sol}$<br>(kcal/mol) |
|-----------------|----------|----------|----------|----------|----------------|------------------------|----------------------------|--------------------------------|
| ethylbenzene    | 0.156401 | 0.163741 | 0.164685 | 0.124309 | -310.709366384 | -310.585057384         | —                          | —                              |
| 1-phenylethanol | 0.161167 | 0.169484 | 0.170428 | 0.127913 | -385.924638073 | -385.796725073         | —                          | —                              |
| $^1RuO_2(CSS)$  | 0.280728 | 0.300393 | 0.301337 | 0.234008 | -1233.18694410 | -1232.95293610         | —                          | 1.2                            |
| $^1RuO_2(OSS)$  | 0.279778 | 0.299731 | 0.300675 | 0.231775 | -1233.18664727 | -1232.95487227         | —                          | —                              |
| $^3RuO_2$       | 0.279070 | 0.299170 | 0.300114 | 0.230973 | -1233.15144697 | -1232.92047397         | —                          | 21.6                           |
| $^5RuO_2$       | 0.276662 | 0.297187 | 0.298131 | 0.227316 | -1233.13066350 | -1232.90334750         | —                          | 32.3                           |
| $^1TS_1(OSS)$   | 0.430670 | 0.459152 | 0.460097 | 0.370774 | -1543.87947235 | -1543.50869835         | 2133.39i                   | 19.6                           |
| $^1TS_1(CSS)^b$ | 0.432053 | 0.460306 | 0.461250 | 0.373039 | -1543.87611667 | -1543.50307767         | 297.27i                    | 23.1                           |
| $^3TS_1$        | 0.430831 | 0.459398 | 0.460343 | 0.370644 | -1543.86282403 | -1543.49218003         | 1194.94i                   | 30.0                           |
| $^1TS_2(OSS)$   | 0.430953 | 0.457582 | 0.458526 | 0.375981 | -1543.85733708 | -1543.48135608         | 1800.39i                   | 36.8                           |
| $^1INT(OSS)$    | 0.435443 | 0.464522 | 0.465466 | 0.377313 | -1543.91483347 | -1543.53752047         | —                          | 1.5                            |
| $^1INT(CSS)^b$  | 0.434611 | 0.463847 | 0.464792 | 0.374084 | -1543.88379539 | -1543.50971139         | —                          | 19.0                           |
| $^3INT$         | 0.434179 | 0.463599 | 0.464544 | 0.373830 | -1543.91437099 | -1543.54054099         | —                          | -0.4                           |
| $^1TS_2(OSS)$   | 0.434614 | 0.463373 | 0.464317 | 0.375973 | -1543.91072724 | -1543.53475424         | 129.36i                    | 3.2                            |
| $^1TS_2(CSS)^b$ | 0.434965 | 0.463402 | 0.464346 | 0.377744 | -1543.88920871 | -1543.51146471         | 115.00i                    | 17.9                           |
| $^3TS_2$        | 0.434361 | 0.462988 | 0.463932 | 0.375576 | -1543.91245695 | -1543.53688095         | 84.12i                     | 1.9                            |

|                                                                     |          |          |          |          |                |                |                  |      |
|---------------------------------------------------------------------|----------|----------|----------|----------|----------------|----------------|------------------|------|
| <sup>1</sup> RuO(OSS)                                               | 0.277519 | 0.295985 | 0.296929 | 0.23235  | -1158.03885624 | -1157.80650624 | —                | —    |
| <sup>1</sup> RuO(CSS) <sup>b</sup>                                  | 0.277696 | 0.296077 | 0.297021 | 0.232666 | -1158.02257457 | -1157.78990857 | —                | —    |
| <sup>3</sup> RuO                                                    | 0.277566 | 0.296008 | 0.296952 | 0.231398 | -1158.05070567 | -1157.81930767 | —                | —    |
| <sup>1</sup> Ru(por <sup>+</sup> )O <sub>2</sub> (OSS) <sup>a</sup> | 1.480529 | 1.542077 | 1.543021 | 1.371362 | -1232.35938266 | -1230.98802066 | —                | —    |
| R_ <sup>1</sup> TS1(OSS) <sup>a</sup>                               | 1.632797 | 1.702365 | 1.703309 | 1.518113 | -1543.05955472 | -1541.54144172 | 2089.40 <i>i</i> | 19.8 |
| R_ <sup>1</sup> INT(OSS) <sup>a</sup>                               | 1.637290 | 1.707461 | 1.708405 | 1.523080 | -1543.09145082 | -1541.56837082 | —                | 3.0  |
| S_ <sup>1</sup> TS1(OSS) <sup>a</sup>                               | 1.633218 | 1.702559 | 1.703503 | 1.519424 | -1543.06456462 | -1541.54514062 | 2096.34 <i>i</i> | 17.5 |
| S_ <sup>1</sup> INT(OSS) <sup>a</sup>                               | 1.636774 | 1.707295 | 1.708239 | 1.520404 | -1543.09456694 | -1541.57416294 | —                | -0.7 |
| R_ <sup>1</sup> TS2(OSS) <sup>a</sup>                               | 1.637061 | 1.706668 | 1.707612 | 1.524372 | -1543.09061474 | -1541.56624274 | 30.18 <i>i</i>   | 4.3  |
| S_ <sup>1</sup> TS2(OSS) <sup>a</sup>                               | 1.636892 | 1.706549 | 1.707493 | 1.524317 | -1543.09447297 | -1541.57015597 | 43.56 <i>i</i>   | 1.8  |
| <sup>1</sup> Ru(por <sup>+</sup> )O(OSS) <sup>a</sup>               | 1.478216 | 1.538292 | 1.539236 | 1.371656 | -1157.21178913 | -1155.84013313 | —                | —    |

ZPVE = zero-point vibrational energy; TCE = thermal correction to energy; TCH = thermal correction to enthalpy; TCG = thermal correction to Gibbs free energy. CSS is closed-shell singlet and OSS is open-shell singlet.

<sup>a</sup>Calculated at the ONIOM (UM06/6-311+G(d,p)-SDD:UFF(SMD<sub>Dichloromethane</sub>)/UM06/6-31G(d)-LANL2DZ:UFF) Level of Theory.

<sup>b</sup>The wavefunction stability for the reaction species are instability.

## Cartesian coordinates of the structures

### ethylbenzene

|   |             |             |             |
|---|-------------|-------------|-------------|
| C | 1.62087300  | -1.20284800 | 0.09527800  |
| C | 0.26004400  | -1.19957700 | -0.19177400 |
| C | -0.43809500 | -0.00002400 | -0.34147800 |
| C | 0.26000900  | 1.19955400  | -0.19180400 |
| C | 1.62083700  | 1.20287400  | 0.09524700  |
| C | 2.30598900  | 0.00002500  | 0.23924500  |
| H | 2.14991700  | -2.14877900 | 0.20367300  |
| H | -0.27626700 | -2.14365200 | -0.30561800 |
| H | -0.27633200 | 2.14361000  | -0.30567200 |
| H | 2.14985300  | 2.14882300  | 0.20361900  |
| H | 3.37211500  | 0.00004400  | 0.46060200  |
| C | -1.92054000 | -0.00004400 | -0.59237700 |
| C | -2.70982300 | 0.00003300  | 0.71386600  |
| H | -2.19752500 | -0.88143400 | -1.18991900 |
| H | -2.19753100 | 0.88127100  | -1.19002700 |
| H | -3.79212600 | 0.00001900  | 0.53323100  |

|   |             |             |            |
|---|-------------|-------------|------------|
| H | -2.46393200 | -0.88472000 | 1.31649500 |
| H | -2.46393700 | 0.88486000  | 1.31638900 |

### 1-phenylethanol

|   |             |             |             |
|---|-------------|-------------|-------------|
| C | -1.79595000 | 1.23916000  | 0.32243900  |
| C | -0.41887000 | 1.13136400  | 0.15336900  |
| C | 0.15073200  | -0.08990300 | -0.20178700 |
| C | -0.67623200 | -1.19830600 | -0.38336800 |
| C | -2.05133400 | -1.09332700 | -0.21005100 |
| C | -2.61549500 | 0.12918100  | 0.14380500  |
| H | -2.23218700 | 2.19958100  | 0.59404600  |
| H | 0.22787600  | 1.99673900  | 0.28178600  |
| H | -0.23370600 | -2.15488700 | -0.66918200 |
| H | -2.68543700 | -1.96622400 | -0.35859300 |
| H | -3.69293300 | 0.21677900  | 0.27517500  |
| C | 1.64415600  | -0.24778800 | -0.32609600 |
| C | 2.23170000  | -0.79413700 | 0.96843600  |
| H | 1.84760100  | -0.97046700 | -1.14101800 |
| H | 3.32023300  | -0.93003100 | 0.88396200  |
| H | 2.02882400  | -0.09196600 | 1.78800100  |
| H | 1.79101500  | -1.76489400 | 1.22815300  |
| O | 2.20626200  | 1.01005900  | -0.63876700 |
| H | 3.16637700  | 0.92744000  | -0.57267400 |

### <sup>1</sup>RuO<sub>2</sub> (OSS)

|   |             |             |             |
|---|-------------|-------------|-------------|
| C | -1.23929900 | 2.82041900  | 0.00048300  |
| C | -2.51320900 | 3.49421400  | 0.00157200  |
| C | -3.47383700 | 2.53012900  | 0.00143000  |
| C | -2.79857500 | 1.25647100  | 0.00051000  |
| N | -1.45808900 | 1.48176600  | -0.00004500 |
| C | 0.01493700  | 3.43167500  | -0.00002200 |
| C | -3.41702100 | 0.00722400  | 0.00002300  |
| C | -2.80393200 | -1.24468300 | -0.00049200 |
| C | -3.48447500 | -2.51557400 | -0.00131600 |
| C | -2.52779400 | -3.48355900 | -0.00145600 |



|    |             |             |             |
|----|-------------|-------------|-------------|
| C  | -1.25110600 | -2.81492800 | -0.00059500 |
| N  | -1.46446600 | -1.47544900 | -0.00002400 |
| C  | 0.00061400  | -3.43134200 | -0.00013100 |
| C  | 1.24631600  | -2.81094700 | 0.00042100  |
| C  | 2.51621400  | -3.48520900 | 0.00145500  |
| C  | 3.48492600  | -2.52783700 | 0.00170900  |
| C  | 2.82334500  | -1.25170500 | 0.00053100  |
| N  | 1.47581900  | -1.46334800 | -0.00009500 |
| C  | 3.44808600  | -0.00711300 | 0.00004200  |
| C  | 2.82844900  | 1.23996400  | -0.00048600 |
| C  | 3.49532900  | 2.51328600  | -0.00158400 |
| C  | 2.53069400  | 3.47478000  | -0.00141200 |
| C  | 1.25796200  | 2.80599900  | -0.00052500 |
| N  | 1.48167200  | 1.45735500  | 0.00006500  |
| H  | -2.64246800 | 4.57156900  | 0.00220400  |
| H  | -4.55163600 | 2.65635800  | 0.00198300  |
| H  | -4.56278000 | -2.63739500 | -0.00177200 |
| H  | -2.66145000 | -4.56037900 | -0.00202000 |
| H  | 2.63924700  | -4.56334800 | 0.00198100  |
| H  | 4.56155300  | -2.66288700 | 0.00248900  |
| H  | 4.57251900  | 2.64377800  | -0.00225500 |
| H  | 2.65833300  | 4.55238400  | -0.00193500 |
| Ru | 0.03114400  | 0.00029800  | -0.00001700 |
| O  | -0.15711900 | -0.00146300 | -1.74238100 |
| O  | -0.15713900 | -0.00149400 | 1.74234800  |
| H  | 0.02414200  | 4.52126700  | -0.00001200 |
| H  | -4.50679600 | 0.00958900  | 0.00009400  |
| H  | 4.53750000  | -0.00930500 | 0.00010700  |
| H  | 0.00526200  | -4.52096700 | -0.00012400 |

### <sup>3</sup>RuO<sub>2</sub>

|   |             |            |             |
|---|-------------|------------|-------------|
| C | 2.03623200  | 2.31686300 | -0.03130400 |
| C | 2.09142400  | 3.75364900 | -0.06691100 |
| C | 0.80449100  | 4.19954900 | -0.07372900 |
| C | -0.04921600 | 3.04108300 | -0.04353300 |
| N | 0.73742800  | 1.92672900 | -0.01732500 |
| C | 3.12741600  | 1.44751300 | -0.01644300 |
| C | -1.44205500 | 3.06927200 | -0.03322700 |

|    |             |             |             |
|----|-------------|-------------|-------------|
| C  | -2.31964300 | 1.98694900  | -0.00647000 |
| C  | -3.75980300 | 2.06649400  | -0.02771300 |
| C  | -4.22938800 | 0.78919700  | -0.02231100 |
| C  | -3.07775000 | -0.07881700 | 0.00227600  |
| N  | -1.95814900 | 0.67931800  | 0.02064000  |
| C  | -3.09244600 | -1.47500300 | -0.02171000 |
| C  | -1.99591600 | -2.32707300 | -0.04219300 |
| C  | -2.06569300 | -3.76278900 | -0.08356100 |
| C  | -0.78822300 | -4.23150500 | -0.08590700 |
| C  | 0.08289900  | -3.08856700 | -0.04366900 |
| N  | -0.67514100 | -1.95524600 | -0.01930300 |
| C  | 1.47398900  | -3.12159600 | -0.02930300 |
| C  | 2.32882100  | -2.02630600 | -0.00511600 |
| C  | 3.76248800  | -2.08769900 | -0.03107000 |
| C  | 4.22469100  | -0.80682200 | -0.02726000 |
| C  | 3.08261900  | 0.06130700  | 0.00028600  |
| N  | 1.94421300  | -0.71101600 | 0.02604600  |
| H  | 3.00574000  | 4.33751400  | -0.08397000 |
| H  | 0.44964300  | 5.22482100  | -0.09677500 |
| H  | 4.11745200  | 1.90211300  | -0.03371200 |
| H  | -1.89897700 | 4.05861600  | -0.05678700 |
| H  | -4.32779000 | 2.99086800  | -0.05055100 |
| H  | -5.26037400 | 0.45138600  | -0.04045100 |
| H  | -4.07218900 | -1.95196700 | -0.04045500 |
| H  | -2.98946600 | -4.33157700 | -0.10813000 |
| H  | -0.45057600 | -5.26232400 | -0.11273100 |
| H  | 1.94175400  | -4.10520200 | -0.05306700 |
| H  | 4.33704700  | -3.00785400 | -0.05634800 |
| H  | 5.25442600  | -0.46534800 | -0.04920700 |
| Ru | 0.03061800  | -0.03377200 | 0.10272300  |
| O  | -0.16950500 | 0.26832700  | -1.79163400 |
| O  | -0.20074100 | 0.19570200  | 1.83228100  |

**<sup>1</sup>TS1 (OSS)**

|   |            |             |             |
|---|------------|-------------|-------------|
| C | 1.41042200 | 1.25697400  | -2.05978800 |
| C | 2.47471200 | 0.86204800  | -2.94561900 |
| C | 2.38265600 | -0.48818800 | -3.10910500 |
| C | 1.26441400 | -0.93228000 | -2.31827400 |

|    |             |             |             |
|----|-------------|-------------|-------------|
| N  | 0.71504700  | 0.14367200  | -1.69579200 |
| C  | 1.12787200  | 2.56401400  | -1.66504800 |
| C  | 0.82372700  | -2.25018600 | -2.18318400 |
| C  | -0.22812900 | -2.70207600 | -1.39199100 |
| C  | -0.62510900 | -4.07450800 | -1.23093100 |
| C  | -1.67945200 | -4.09286700 | -0.36848300 |
| C  | -1.94894500 | -2.73077600 | 0.00562800  |
| N  | -1.04657800 | -1.91942200 | -0.62273200 |
| C  | -2.96816500 | -2.30748900 | 0.85453600  |
| C  | -3.27777700 | -0.99518900 | 1.20711300  |
| C  | -4.34592100 | -0.58627000 | 2.08153600  |
| C  | -4.30024100 | 0.77164600  | 2.16221700  |
| C  | -3.20079600 | 1.21095800  | 1.34300800  |
| N  | -2.61556300 | 0.11415600  | 0.77943600  |
| C  | -2.79492400 | 2.53119100  | 1.17491800  |
| C  | -1.71071600 | 2.99236900  | 0.42742500  |
| C  | -1.28597700 | 4.36609500  | 0.30829300  |
| C  | -0.17901800 | 4.37167100  | -0.48208700 |
| C  | 0.08038500  | 3.00223100  | -0.85639200 |
| N  | -0.86734200 | 2.21200100  | -0.29068600 |
| H  | 3.19233200  | 1.54406700  | -3.39039700 |
| H  | 3.00980700  | -1.13608200 | -3.71304300 |
| H  | 1.79756800  | 3.33519200  | -2.04556400 |
| H  | 1.37083700  | -3.00823500 | -2.74332200 |
| H  | -0.14720100 | -4.91517500 | -1.72343900 |
| H  | -2.24046100 | -4.95147900 | -0.01389500 |
| H  | -3.60010900 | -3.08695600 | 1.27942900  |
| H  | -5.03925400 | -1.26484800 | 2.56775400  |
| H  | -4.94759000 | 1.43240500  | 2.72962400  |
| H  | -3.37853200 | 3.28631600  | 1.70117600  |
| H  | -1.77921200 | 5.20925500  | 0.78087200  |
| H  | 0.42080500  | 5.22115700  | -0.79230000 |
| Ru | -0.98819900 | 0.12813600  | -0.48655000 |
| O  | 0.14681800  | 0.15569000  | 0.98245900  |
| O  | -1.94625100 | 0.44869000  | -1.91982400 |
| C  | 5.14170300  | 0.56213100  | 0.73330700  |
| C  | 4.01125400  | -0.18887200 | 0.45204400  |
| C  | 3.24751300  | -0.76353200 | 1.48362900  |

|   |            |             |             |
|---|------------|-------------|-------------|
| C | 3.65726500 | -0.54818700 | 2.80853300  |
| C | 4.79220900 | 0.20129000  | 3.08886400  |
| C | 5.53945800 | 0.76011000  | 2.05508800  |
| H | 5.72071500 | 0.99484100  | -0.08145200 |
| H | 3.69870900 | -0.34428600 | -0.58307500 |
| H | 3.08181300 | -0.97888500 | 3.62681100  |
| H | 5.09757500 | 0.35099500  | 4.12352000  |
| H | 6.42852800 | 1.34794100  | 2.27776800  |
| C | 2.03833500 | -1.51743800 | 1.14453800  |
| C | 1.39211700 | -2.41549100 | 2.16543000  |
| H | 2.07829000 | -1.94902900 | 0.13533400  |
| H | 1.13579400 | -0.61683700 | 0.97177300  |
| H | 0.49677400 | -2.88960700 | 1.74296000  |
| H | 2.07485500 | -3.21125300 | 2.50169400  |
| H | 1.07198500 | -1.85166200 | 3.05208800  |

### **<sup>3</sup>TS1**

|   |             |             |             |
|---|-------------|-------------|-------------|
| C | 1.23345700  | 1.70286700  | -1.87349300 |
| C | 2.34979100  | 1.55007300  | -2.77251500 |
| C | 2.43765400  | 0.22557100  | -3.07994000 |
| C | 1.37945000  | -0.44021000 | -2.36235700 |
| N | 0.68725500  | 0.48002300  | -1.64697100 |
| C | 0.77615500  | 2.91098600  | -1.34570900 |
| C | 1.11657300  | -1.81225400 | -2.36304000 |
| C | 0.13445400  | -2.47475100 | -1.63554500 |
| C | -0.06724400 | -3.89744100 | -1.61313800 |
| C | -1.11272500 | -4.14582500 | -0.77630900 |
| C | -1.57186600 | -2.87710000 | -0.28057900 |
| N | -0.78966600 | -1.88889100 | -0.80684400 |
| C | -2.64607600 | -2.68105100 | 0.58376000  |
| C | -3.13079800 | -1.46336700 | 1.04997100  |
| C | -4.23876200 | -1.29190700 | 1.95088700  |
| C | -4.37891500 | 0.04396000  | 2.16847200  |
| C | -3.35557400 | 0.71056800  | 1.40949200  |
| N | -2.62702600 | -0.23385600 | 0.73335500  |
| C | -3.13065200 | 2.08048500  | 1.39319900  |
| C | -2.10945800 | 2.75433500  | 0.72078400  |
| C | -1.85351200 | 4.17226500  | 0.76274300  |

|    |             |             |             |
|----|-------------|-------------|-------------|
| C  | -0.74991600 | 4.39723100  | -0.00059100 |
| C  | -0.32327800 | 3.12044700  | -0.51765200 |
| N  | -1.17753400 | 2.16343800  | -0.06324500 |
| H  | 2.97640100  | 2.36371900  | -3.12353800 |
| H  | 3.15051600  | -0.26785100 | -3.73282100 |
| H  | 1.34334200  | 3.79983100  | -1.62235700 |
| H  | 1.76216800  | -2.43402100 | -2.98324500 |
| H  | 0.52590300  | -4.61134300 | -2.17543300 |
| H  | -1.55034500 | -5.10400300 | -0.51560700 |
| H  | -3.16645800 | -3.57548300 | 0.92504900  |
| H  | -4.82849500 | -2.10455400 | 2.36248500  |
| H  | -5.10544600 | 0.54911900  | 2.79656800  |
| H  | -3.80749900 | 2.69017100  | 1.99125600  |
| H  | -2.44738700 | 4.89238600  | 1.31599700  |
| H  | -0.25446400 | 5.34123800  | -0.20321000 |
| Ru | -1.03800100 | 0.12206400  | -0.49644500 |
| O  | 0.18869300  | 0.27305700  | 0.98592800  |
| O  | -1.89564700 | 0.47278100  | -1.99013700 |
| C  | 5.14932300  | 0.66642200  | 0.71369200  |
| C  | 4.00338200  | -0.05967400 | 0.42822600  |
| C  | 3.30325500  | -0.73444700 | 1.44134200  |
| C  | 3.78688200  | -0.64734600 | 2.75281800  |
| C  | 4.93883000  | 0.07571600  | 3.03875400  |
| C  | 5.62412800  | 0.73580600  | 2.02278000  |
| H  | 5.67795900  | 1.18140000  | -0.08733600 |
| H  | 3.62757900  | -0.11182400 | -0.59635100 |
| H  | 3.25977600  | -1.15858900 | 3.55719600  |
| H  | 5.30471400  | 0.12459700  | 4.06341400  |
| H  | 6.52516100  | 1.30365600  | 2.24948000  |
| C  | 2.06913300  | -1.46583500 | 1.08983200  |
| C  | 1.44662900  | -2.39447000 | 2.10181100  |
| H  | 2.13853800  | -1.91313900 | 0.08766500  |
| H  | 1.23724600  | -0.60612500 | 0.91614900  |
| H  | 0.53283800  | -2.84323600 | 1.69114500  |
| H  | 2.13097900  | -3.20825800 | 2.38493100  |
| H  | 1.16153800  | -1.85653200 | 3.01555900  |

**<sup>1</sup>TS1<sub>σ</sub>' (OSS)**

|    |             |             |             |
|----|-------------|-------------|-------------|
| C  | -1.72346900 | 2.96772200  | -0.16031600 |
| C  | -2.81285800 | 3.72766000  | -0.70528000 |
| C  | -3.79921900 | 2.84849500  | -1.03954200 |
| C  | -3.33108700 | 1.53361500  | -0.70637400 |
| N  | -2.07344800 | 1.64134400  | -0.17789000 |
| C  | -0.52159800 | 3.49603200  | 0.29782500  |
| C  | -4.03047300 | 0.34541400  | -0.89152500 |
| C  | -3.58732400 | -0.93876800 | -0.58671000 |
| C  | -4.31549900 | -2.15616600 | -0.80185600 |
| C  | -3.52211300 | -3.18218600 | -0.38190000 |
| C  | -2.29641900 | -2.61042200 | 0.09951600  |
| N  | -2.37376100 | -1.24881400 | -0.03920800 |
| C  | -1.21656800 | -3.32704100 | 0.60568400  |
| C  | -0.00652000 | -2.81532600 | 1.07616100  |
| C  | 1.12278900  | -3.58168600 | 1.54415100  |
| C  | 2.09748800  | -2.68968900 | 1.86998600  |
| C  | 1.57314600  | -1.37198100 | 1.60561200  |
| N  | 0.30487200  | -1.49879500 | 1.14166000  |
| C  | 2.26754900  | -0.17496800 | 1.77522000  |
| C  | 1.82500900  | 1.11549100  | 1.49598600  |
| C  | 2.59770300  | 2.32206700  | 1.66795300  |
| C  | 1.81931000  | 3.35904100  | 1.25706600  |
| C  | 0.56351600  | 2.79435500  | 0.82624800  |
| N  | 0.60693400  | 1.45264400  | 0.99863400  |
| H  | -2.81295800 | 4.80719700  | -0.81588900 |
| H  | -4.76780700 | 3.06363700  | -1.47879000 |
| H  | -0.41417500 | 4.57810100  | 0.22618900  |
| H  | -5.02594400 | 0.42788800  | -1.32629300 |
| H  | -5.31217500 | -2.21057000 | -1.22729100 |
| H  | -3.74035200 | -4.24512800 | -0.39427200 |
| H  | -1.32708300 | -4.41105200 | 0.62499600  |
| H  | 1.15375400  | -4.66462100 | 1.60581800  |
| H  | 3.09422000  | -2.89053000 | 2.25016600  |
| H  | 3.28938000  | -0.26106600 | 2.14391900  |
| H  | 3.61452200  | 2.35057500  | 2.04656700  |
| H  | 2.06257900  | 4.41631100  | 1.23510000  |
| Ru | -0.92683300 | 0.09377000  | 0.49017400  |
| O  | 0.09719500  | -0.10445300 | -0.96737700 |

|   |             |             |             |
|---|-------------|-------------|-------------|
| O | -1.34394300 | 0.20690900  | 2.16584500  |
| C | 4.33939500  | 1.41829400  | -1.09131500 |
| C | 3.25847400  | 1.08539800  | -1.89384900 |
| C | 2.86935800  | -0.25180500 | -2.08306400 |
| C | 3.59353500  | -1.23929300 | -1.39947600 |
| C | 4.68061800  | -0.90759600 | -0.59555300 |
| C | 5.06532700  | 0.42029700  | -0.44041900 |
| H | 4.61940700  | 2.46461700  | -0.96970600 |
| H | 2.68859700  | 1.87071900  | -2.39439100 |
| H | 3.30943400  | -2.28593100 | -1.50674900 |
| H | 5.23401000  | -1.69887600 | -0.08858900 |
| H | 5.92121500  | 0.67841900  | 0.18256900  |
| C | 1.66818100  | -0.55133000 | -2.89001500 |
| C | 1.41612000  | -1.99070200 | -3.27001100 |
| H | 1.55640700  | 0.14694800  | -3.72984700 |
| H | 0.77788100  | -0.24856100 | -2.01183100 |
| H | 0.52300100  | -2.07469400 | -3.90085100 |
| H | 2.25690500  | -2.44552700 | -3.81838400 |
| H | 1.23543800  | -2.60760300 | -2.37541100 |

**<sup>1</sup>INT (OSS)**

|   |             |             |             |
|---|-------------|-------------|-------------|
| C | 0.43311200  | 2.83187200  | -0.71014600 |
| C | 1.65283700  | 3.47117700  | -1.13021100 |
| C | 2.49879700  | 2.48831900  | -1.54719900 |
| C | 1.80356900  | 1.23949300  | -1.38468900 |
| N | 0.56930900  | 1.48532600  | -0.87434400 |
| C | -0.69845200 | 3.48369900  | -0.22183100 |
| C | 2.30415700  | -0.02711400 | -1.68743800 |
| C | 1.65911400  | -1.24389300 | -1.51014900 |
| C | 2.22308600  | -2.53210600 | -1.79688400 |
| C | 1.28801500  | -3.46808400 | -1.46919900 |
| C | 0.13638200  | -2.76577500 | -0.97814000 |
| N | 0.39009100  | -1.42208700 | -1.01769000 |
| C | -1.04154700 | -3.35262800 | -0.52568400 |
| C | -2.16354300 | -2.69225900 | -0.03497300 |
| C | -3.36201600 | -3.31966700 | 0.45371500  |
| C | -4.20507300 | -2.32578400 | 0.84451200  |
| C | -3.53455900 | -1.07632100 | 0.60319700  |

|    |             |             |             |
|----|-------------|-------------|-------------|
| N  | -2.30273100 | -1.33858600 | 0.06443300  |
| C  | -4.05853300 | 0.17987500  | 0.88037000  |
| C  | -3.43288300 | 1.41337400  | 0.69326000  |
| C  | -3.98061500 | 2.70316500  | 1.03317200  |
| C  | -3.03234500 | 3.62846700  | 0.72361800  |
| C  | -1.89955200 | 2.91090200  | 0.19201200  |
| N  | -2.19084800 | 1.58420400  | 0.18417100  |
| H  | 1.82761500  | 4.54202000  | -1.10540900 |
| H  | 3.51149700  | 2.58497700  | -1.92557000 |
| H  | -0.63326100 | 4.56953100  | -0.15094600 |
| H  | 3.31847800  | -0.06899900 | -2.08309500 |
| H  | 3.22010200  | -2.68929900 | -2.19702000 |
| H  | 1.36230800  | -4.54791400 | -1.54887100 |
| H  | -1.08602100 | -4.44107000 | -0.55113100 |
| H  | -3.52504100 | -4.39189400 | 0.48970000  |
| H  | -5.20028100 | -2.41693400 | 1.26739400  |
| H  | -5.06145300 | 0.20145100  | 1.30626100  |
| H  | -4.96455400 | 2.86488500  | 1.46118200  |
| H  | -3.07986300 | 4.70595700  | 0.84432000  |
| Ru | -0.91757300 | 0.05877800  | -0.49994400 |
| O  | -0.27587200 | 0.17454400  | 1.34799400  |
| O  | -1.56138500 | 0.43169900  | -2.07461700 |
| C  | 5.02467800  | 0.62266400  | 0.57352700  |
| C  | 4.51341400  | -0.65419600 | 0.71311800  |
| C  | 3.36174400  | -0.90680900 | 1.50401200  |
| C  | 2.78454600  | 0.20147500  | 2.18099300  |
| C  | 3.29329900  | 1.47996700  | 2.02115700  |
| C  | 4.40918100  | 1.70504000  | 1.21048400  |
| H  | 5.90779700  | 0.78674800  | -0.04376600 |
| H  | 4.98513400  | -1.49413800 | 0.19935100  |
| H  | 1.93924400  | 0.03377100  | 2.84851600  |
| H  | 2.82166200  | 2.31463500  | 2.53906000  |
| H  | 4.80243100  | 2.71267200  | 1.08677300  |
| C  | 2.80933600  | -2.20265900 | 1.57359300  |
| C  | 1.55509600  | -2.54202500 | 2.29642600  |
| H  | 3.34637100  | -2.99969100 | 1.05562400  |
| H  | 0.63184300  | 0.52736800  | 1.33117600  |
| H  | 1.23314900  | -3.56540700 | 2.07222500  |



|   |            |             |            |
|---|------------|-------------|------------|
| H | 1.67484400 | -2.46863900 | 3.39083600 |
| H | 0.73103900 | -1.85921300 | 2.02417600 |

**<sup>3</sup>INT**

|   |             |             |             |
|---|-------------|-------------|-------------|
| C | -3.20658200 | -1.58985800 | 0.50932800  |
| C | -4.50451700 | -1.46245400 | 1.12198000  |
| C | -4.73406200 | -0.13147500 | 1.28719900  |
| C | -3.57720100 | 0.56409800  | 0.78092200  |
| N | -2.68779500 | -0.35351000 | 0.31414000  |
| H | -5.14694100 | -2.29479600 | 1.39015000  |
| H | -5.60440500 | 0.35190200  | 1.71920300  |
| C | -3.39890300 | 1.94570400  | 0.79135400  |
| C | -2.13686600 | 4.09688700  | 0.41181200  |
| C | -0.90470100 | 4.38994300  | -0.08876300 |
| C | -0.29163700 | 3.13825000  | -0.45239700 |
| N | -1.15078500 | 2.12913900  | -0.16450700 |
| C | -2.28483300 | 2.66468500  | 0.36082800  |
| H | -2.88905400 | 4.78269300  | 0.78824200  |
| H | -0.44141500 | 5.36408100  | -0.20726100 |
| C | -2.56905700 | -2.78724300 | 0.17965000  |
| N | -0.46593000 | -1.91166900 | -0.74570000 |
| C | 0.67125700  | -2.46366900 | -1.26311400 |
| C | 0.54160500  | -3.89448300 | -1.24160200 |
| C | -0.67784200 | -4.18245700 | -0.70602000 |
| C | -1.31241500 | -2.93263700 | -0.39225400 |
| H | 1.29872500  | -4.58625900 | -1.59729700 |
| H | -1.12160500 | -5.15766300 | -0.53344200 |
| C | 1.78027400  | -1.75756200 | -1.72151300 |
| N | 1.05199400  | 0.52450200  | -1.22311800 |
| C | 1.58995400  | 1.77700200  | -1.36440200 |
| C | 2.89137900  | 1.65456600  | -1.96478700 |
| C | 3.11389700  | 0.33001300  | -2.17779700 |
| C | 1.95365700  | -0.37749100 | -1.70649700 |
| H | 3.54775500  | 2.49051100  | -2.18418600 |
| H | 3.99170400  | -0.14443100 | -2.60556600 |
| C | 0.97994700  | 2.97314700  | -1.00643500 |
| H | 1.55555500  | 3.88131800  | -1.18421200 |
| H | 2.60510700  | -2.34969000 | -2.11905300 |

|    |             |             |             |
|----|-------------|-------------|-------------|
| H  | -3.11159100 | -3.70648400 | 0.39916100  |
| H  | -4.22275400 | 2.53304500  | 1.19711000  |
| O  | -0.26188100 | 0.09714500  | 1.34156400  |
| H  | 0.42872500  | 0.77437100  | 1.44981800  |
| C  | 2.55040600  | -2.24754800 | 1.51012400  |
| H  | 3.06858600  | -2.97523000 | 0.88083300  |
| C  | 3.11381600  | -0.95793300 | 1.59850400  |
| C  | 4.26684100  | -0.62002500 | 0.84402800  |
| C  | 4.80050100  | 0.65426100  | 0.87840100  |
| C  | 4.20820900  | 1.64751400  | 1.66359000  |
| C  | 3.08651700  | 1.33471000  | 2.43626600  |
| C  | 2.54978200  | 0.05785600  | 2.41644100  |
| H  | 4.71946300  | -1.38858100 | 0.21419400  |
| H  | 5.67915400  | 0.88838500  | 0.27793700  |
| H  | 4.62552500  | 2.65285700  | 1.68447600  |
| H  | 2.63519000  | 2.09780100  | 3.07005700  |
| H  | 1.68792100  | -0.17999300 | 3.03766900  |
| C  | 1.30290400  | -2.65773600 | 2.20023300  |
| H  | 0.48768700  | -1.94202500 | 1.98548800  |
| H  | 0.98127400  | -3.65709200 | 1.88549000  |
| H  | 1.42245700  | -2.67428500 | 3.29674400  |
| O  | -1.65324400 | 0.37752600  | -2.05771200 |
| Ru | -0.83914600 | 0.08469500  | -0.54119400 |

### **<sup>1</sup>TS2 (OSS)**

|   |             |             |             |
|---|-------------|-------------|-------------|
| C | -3.31425200 | -0.66767500 | 1.03639200  |
| C | -4.35839000 | -0.13813800 | 1.87761700  |
| C | -4.16659100 | 1.20672900  | 1.94660600  |
| C | -3.00064800 | 1.50921900  | 1.15332600  |
| N | -2.52875600 | 0.35352100  | 0.61464000  |
| H | -5.13193500 | -0.73303900 | 2.35215400  |
| H | -4.75062000 | 1.94210300  | 2.49054700  |
| C | -2.43762000 | 2.77353000  | 0.99533400  |
| C | -0.71124900 | 4.42613300  | 0.19072300  |
| C | 0.42441500  | 4.31613500  | -0.55185200 |
| C | 0.55888300  | 2.92750600  | -0.90996200 |
| N | -0.48151300 | 2.23442300  | -0.37879600 |
| C | -1.27767600 | 3.10558500  | 0.29719700  |

|   |             |             |             |
|---|-------------|-------------|-------------|
| H | -1.13751300 | 5.31864700  | 0.63734300  |
| H | 1.11863900  | 5.09913500  | -0.83906300 |
| C | -3.12349300 | -2.01174000 | 0.71745200  |
| N | -1.12545500 | -1.83913700 | -0.70300800 |
| C | -0.33205600 | -2.72429900 | -1.37617500 |
| C | -0.84603100 | -4.05187000 | -1.17481200 |
| C | -1.94253900 | -3.94249100 | -0.37405200 |
| C | -2.11645000 | -2.54684400 | -0.07716800 |
| H | -0.41073200 | -4.95171100 | -1.59727000 |
| H | -2.58858600 | -4.73445800 | -0.00918000 |
| C | 0.80901600  | -2.39952800 | -2.10554000 |
| N | 0.88727000  | 0.01622300  | -1.70215200 |
| C | 1.73538500  | 1.03759000  | -2.03447300 |
| C | 2.81172300  | 0.50433300  | -2.82505600 |
| C | 2.58896600  | -0.83289500 | -2.96015000 |
| C | 1.37615400  | -1.13487600 | -2.24739100 |
| H | 3.63060700  | 1.09245800  | -3.22693600 |
| H | 3.18909600  | -1.56322800 | -3.49337400 |
| C | 1.58911700  | 2.37167700  | -1.66888700 |
| H | 2.36092700  | 3.05688900  | -2.01866200 |
| H | 1.32692700  | -3.22476800 | -2.59365500 |
| H | -3.83671900 | -2.71986000 | 1.13872400  |
| H | -2.95200600 | 3.59562800  | 1.49298900  |
| O | 0.09289100  | 0.01235900  | 1.08141800  |
| H | 0.91014100  | 0.53975000  | 1.07303400  |
| C | 1.72756200  | -2.03401000 | 1.53722400  |
| H | 1.58011600  | -2.36241700 | 0.50710000  |
| C | 2.79124700  | -1.13253900 | 1.77483100  |
| C | 3.55684000  | -0.64275500 | 0.68594400  |
| C | 4.56241000  | 0.28633700  | 0.87716400  |
| C | 4.85514700  | 0.75459000  | 2.16157200  |
| C | 4.11830400  | 0.28133300  | 3.24984800  |
| C | 3.10152700  | -0.64083500 | 3.06701100  |
| H | 3.32693400  | -1.00476300 | -0.31827200 |
| H | 5.12582900  | 0.65243300  | 0.01891300  |
| H | 5.64891800  | 1.48410700  | 2.31295400  |
| H | 4.34038900  | 0.64492700  | 4.25245600  |
| H | 2.52606800  | -0.99143800 | 3.92310700  |

|    |             |             |             |
|----|-------------|-------------|-------------|
| C  | 0.82949700  | -2.57756300 | 2.58687800  |
| H  | 0.31454800  | -1.76440600 | 3.11987900  |
| H  | 0.05852000  | -3.22103000 | 2.14734800  |
| H  | 1.37656900  | -3.17107300 | 3.33796500  |
| O  | -1.86761100 | 0.63251000  | -1.98000900 |
| Ru | -0.86237200 | 0.19013900  | -0.62344900 |

### **<sup>3</sup>TS2**

|   |             |             |             |
|---|-------------|-------------|-------------|
| C | -3.13386100 | -1.33437000 | 0.62257300  |
| C | -4.34464600 | -1.11741300 | 1.37316400  |
| C | -4.45466900 | 0.22453800  | 1.56695800  |
| C | -3.30934200 | 0.83875200  | 0.94262500  |
| N | -2.54852800 | -0.13625500 | 0.37415400  |
| H | -5.01482400 | -1.90290900 | 1.70677200  |
| H | -5.23381300 | 0.76589700  | 2.09384100  |
| C | -3.02216100 | 2.20154500  | 0.95206600  |
| C | -1.61973900 | 4.24952300  | 0.49532500  |
| C | -0.41424900 | 4.44869800  | -0.10498000 |
| C | 0.05193100  | 3.15912600  | -0.54784000 |
| N | -0.86804200 | 2.22127100  | -0.20990100 |
| C | -1.89748600 | 2.83688400  | 0.42752900  |
| H | -2.27188800 | 4.98633500  | 0.95306800  |
| H | 0.12346900  | 5.38139600  | -0.24092300 |
| C | -2.62853200 | -2.57131700 | 0.22267400  |
| N | -0.57673300 | -1.84429700 | -0.92069900 |
| C | 0.44917900  | -2.47315600 | -1.57255700 |
| C | 0.20495400  | -3.88828400 | -1.55779400 |
| C | -0.96273300 | -4.09090600 | -0.88412800 |
| C | -1.45569700 | -2.80276200 | -0.48543700 |
| H | 0.85695800  | -4.63027400 | -2.00746000 |
| H | -1.46067100 | -5.03202400 | -0.67387400 |
| C | 1.56591600  | -1.85127900 | -2.12264300 |
| N | 1.09330000  | 0.46683700  | -1.49951900 |
| C | 1.73129600  | 1.66911600  | -1.63854400 |
| C | 2.97668400  | 1.45297000  | -2.32706300 |
| C | 3.06049900  | 0.12241300  | -2.60029100 |
| C | 1.87027100  | -0.49300500 | -2.07422700 |
| H | 3.68835200  | 2.23522300  | -2.57082600 |

|    |             |             |             |
|----|-------------|-------------|-------------|
| H  | 3.85541400  | -0.41032700 | -3.11262200 |
| C  | 1.25769700  | 2.90177700  | -1.20218600 |
| H  | 1.89805800  | 3.76171200  | -1.39738500 |
| H  | 2.29065000  | -2.49860400 | -2.61649200 |
| H  | -3.21201400 | -3.45007900 | 0.49624400  |
| H  | -3.75101600 | 2.84304000  | 1.44742100  |
| O  | 0.00869400  | 0.07885500  | 1.14366400  |
| H  | 0.84233200  | 0.58049700  | 1.18621600  |
| C  | 1.83634400  | -2.31190400 | 1.54073100  |
| H  | 2.03864200  | -2.80351000 | 0.58702400  |
| C  | 2.62568500  | -1.18411700 | 1.86021100  |
| C  | 3.56450400  | -0.68106500 | 0.92356800  |
| C  | 4.29000000  | 0.46877800  | 1.17892000  |
| C  | 4.12563900  | 1.15364000  | 2.38618800  |
| C  | 3.21983200  | 0.66647700  | 3.33322400  |
| C  | 2.48144400  | -0.47677200 | 3.08170400  |
| H  | 3.68408000  | -1.20492300 | -0.02631700 |
| H  | 4.98638900  | 0.84189600  | 0.42826600  |
| H  | 4.69645700  | 2.05850700  | 2.58749900  |
| H  | 3.08568600  | 1.19590100  | 4.27582100  |
| H  | 1.75744900  | -0.82758700 | 3.81591900  |
| C  | 0.75059800  | -2.85468000 | 2.39820100  |
| H  | -0.04330800 | -2.10283300 | 2.53538800  |
| H  | 0.29470100  | -3.74139200 | 1.94172600  |
| H  | 1.10937200  | -3.14021300 | 3.40060800  |
| O  | -1.64900800 | 0.57395600  | -2.09896500 |
| Ru | -0.76623000 | 0.16681000  | -0.64780800 |

**<sup>1</sup>RuO (OSS)**

|   |             |             |             |
|---|-------------|-------------|-------------|
| C | -2.86543100 | -1.08979800 | -0.12292300 |
| C | -4.23605800 | -0.66076600 | -0.16705200 |
| C | -4.22969300 | 0.70019400  | -0.16734200 |
| C | -2.85514000 | 1.11642500  | -0.12292500 |
| N | -2.04982900 | 0.00953500  | -0.10225500 |
| C | -2.43381400 | -2.41122000 | -0.11964100 |
| C | -2.41125600 | 2.43376100  | -0.11966900 |
| C | -1.08978200 | 2.86527300  | -0.12295200 |
| C | -0.66077100 | 4.23594300  | -0.16733500 |

|    |             |             |             |
|----|-------------|-------------|-------------|
| C  | 0.70020600  | 4.22960800  | -0.16725100 |
| C  | 1.11643100  | 2.85500800  | -0.12294200 |
| N  | 0.00956500  | 2.04981200  | -0.10193300 |
| C  | 2.43382200  | 2.41120800  | -0.11962500 |
| C  | 2.86541400  | 1.08977900  | -0.12289900 |
| C  | 4.23604900  | 0.66076000  | -0.16697200 |
| C  | 4.22969800  | -0.70019900 | -0.16739800 |
| C  | 2.85515100  | -1.11643700 | -0.12290700 |
| N  | 2.04982300  | -0.00956900 | -0.10225100 |
| C  | 2.41127000  | -2.43378100 | -0.11965400 |
| C  | 1.08978600  | -2.86528600 | -0.12293100 |
| C  | 0.66077200  | -4.23594700 | -0.16749500 |
| C  | -0.70020400 | -4.22960500 | -0.16706400 |
| C  | -1.11641600 | -2.85499500 | -0.12294600 |
| N  | -0.00953900 | -2.04981000 | -0.10193200 |
| H  | -5.09028300 | -1.32931200 | -0.19939100 |
| H  | -5.07764000 | 1.37667300  | -0.19991400 |
| H  | -1.32943200 | 5.09007300  | -0.19959700 |
| H  | 1.37679100  | 5.07747700  | -0.19944300 |
| H  | 5.09026700  | 1.32931800  | -0.19926300 |
| H  | 5.07764400  | -1.37667800 | -0.20002500 |
| H  | 1.32943600  | -5.09007100 | -0.19989100 |
| H  | -1.37680100 | -5.07747000 | -0.19911800 |
| Ru | -0.00001300 | 0.00001700  | 0.15051200  |
| O  | 0.00002800  | -0.00000500 | 1.89714400  |
| H  | -3.20784700 | -3.17822200 | -0.13613300 |
| H  | -3.17813100 | 3.20791700  | -0.13628700 |
| H  | 3.17814100  | -3.20793900 | -0.13632600 |
| H  | 3.20788100  | 3.17818300  | -0.13614300 |

### **<sup>3</sup>RuO**

|   |             |            |             |
|---|-------------|------------|-------------|
| C | 1.09634200  | 2.86441700 | -0.12157600 |
| C | 0.67053000  | 4.23687300 | -0.16160700 |
| C | -0.69044800 | 4.23368700 | -0.16160400 |
| C | -1.10983400 | 2.85925400 | -0.12158000 |
| N | -0.00483700 | 2.05266500 | -0.10452400 |
| C | 2.41707300  | 2.42847600 | -0.11791700 |
| C | -2.42847900 | 2.41707100 | -0.11793000 |

|    |             |             |             |
|----|-------------|-------------|-------------|
| C  | -2.86442500 | 1.09634200  | -0.12147500 |
| C  | -4.23688500 | 0.67052900  | -0.16131000 |
| C  | -4.23369700 | -0.69045000 | -0.16133200 |
| C  | -2.85926100 | -1.10983500 | -0.12145600 |
| N  | -2.05266900 | -0.00483800 | -0.10451200 |
| C  | -2.41707400 | -2.42847900 | -0.11789300 |
| C  | -1.09634300 | -2.86442000 | -0.12153700 |
| C  | -0.67053000 | -4.23687700 | -0.16152700 |
| C  | 0.69044800  | -4.23368900 | -0.16154400 |
| C  | 1.10983400  | -2.85925600 | -0.12152800 |
| N  | 0.00483600  | -2.05266700 | -0.10449100 |
| C  | 2.42847800  | -2.41707300 | -0.11787700 |
| C  | 2.86442400  | -1.09634300 | -0.12144100 |
| C  | 4.23688600  | -0.67053100 | -0.16125300 |
| C  | 4.23369600  | 0.69044700  | -0.16133400 |
| C  | 2.85926100  | 1.10983300  | -0.12145500 |
| N  | 2.05266900  | 0.00483600  | -0.10450200 |
| H  | 1.34073900  | 5.08991200  | -0.19120900 |
| H  | -1.36465800 | 5.08356600  | -0.19120100 |
| H  | 3.18584800  | 3.20090300  | -0.13155400 |
| H  | -3.20090300 | 3.18584900  | -0.13155900 |
| H  | -5.08992800 | 1.34073800  | -0.19079800 |
| H  | -5.08357900 | -1.36466000 | -0.19083100 |
| H  | -3.18584900 | -3.20090500 | -0.13151500 |
| H  | -1.34073800 | -5.08991700 | -0.19110600 |
| H  | 1.36465800  | -5.08356800 | -0.19113200 |
| H  | 3.20090300  | -3.18585000 | -0.13148600 |
| H  | 5.08992900  | -1.34074000 | -0.19070900 |
| H  | 5.08357900  | 1.36465700  | -0.19085200 |
| Ru | -0.00000100 | 0.00000100  | 0.14224900  |
| O  | 0.00000900  | 0.00001600  | 1.89153600  |

### <sup>1</sup>Ru (por\*) O<sub>2</sub> (OSS)

|       |   |            |            |             |   |
|-------|---|------------|------------|-------------|---|
| C-C_R | 0 | 2.55409300 | 1.72319900 | -0.01429300 | H |
| C-C_R | 0 | 2.99239500 | 3.10188300 | -0.03990700 | H |
| C-C_R | 0 | 1.88462100 | 3.87896900 | -0.04450200 | H |
| C-C_R | 0 | 0.73918000 | 2.99617200 | -0.01813500 | H |
| N-N_R | 0 | 1.19302300 | 1.71463500 | -0.00429900 | H |

|          |   |             |             |             |   |
|----------|---|-------------|-------------|-------------|---|
| C-C_R    | 0 | 3.39624000  | 0.60197400  | 0.00086300  | H |
| C-C_R    | 0 | -0.60407400 | 3.40045600  | -0.00404600 | H |
| C-C_R    | 0 | -1.71970400 | 2.55422600  | 0.01322600  | H |
| C-C_R    | 0 | -3.09615200 | 2.98866700  | 0.03984500  | H |
| C-C_R    | 0 | -3.87591500 | 1.88160100  | 0.04150100  | H |
| C-C_R    | 0 | -3.00035500 | 0.73531600  | 0.01826200  | H |
| N-N_R    | 0 | -1.71181700 | 1.18565900  | 0.00449400  | H |
| C-C_R    | 0 | -3.41026200 | -0.60427500 | 0.00697300  | H |
| C-C_R    | 0 | -2.56306100 | -1.71832200 | -0.00769800 | H |
| C-C_R    | 0 | -2.99078100 | -3.09465500 | -0.03073200 | H |
| C-C_R    | 0 | -1.87953200 | -3.86905200 | -0.03635200 | H |
| C-C_R    | 0 | -0.73469400 | -2.99272200 | -0.01373800 | H |
| N-N_R    | 0 | -1.19419800 | -1.70088000 | -0.00019300 | H |
| C-C_R    | 0 | 0.60241100  | -3.40590200 | -0.00375600 | H |
| C-C_R    | 0 | 1.72316300  | -2.56250400 | 0.00996600  | H |
| C-C_R    | 0 | 3.10163300  | -2.99449400 | 0.03474200  | H |
| C-C_R    | 0 | 3.87310900  | -1.88236900 | 0.03506200  | H |
| C-C_R    | 0 | 2.98829100  | -0.73903400 | 0.01250100  | H |
| N-N_R    | 0 | 1.70501800  | -1.20219800 | 0.00009500  | H |
| H-H_     | 0 | 4.02433900  | 3.43776300  | -0.05453500 | H |
| H-H_     | 0 | 1.84791900  | 4.96345700  | -0.06463100 | H |
| H-H_     | 0 | -3.43240800 | 4.02044300  | 0.05628300  | H |
| H-H_     | 0 | -4.96050600 | 1.84799500  | 0.05835100  | H |
| H-H_     | 0 | -4.02122400 | -3.43496900 | -0.04269100 | H |
| H-H_     | 0 | -1.84343700 | -4.95354100 | -0.05499400 | H |
| H-H_     | 0 | 3.44167600  | -4.02493100 | 0.05118100  | H |
| H-H_     | 0 | 4.95758500  | -1.84224000 | 0.05021800  | H |
| Ru-Ru6+2 | 0 | -0.02079900 | -0.01146500 | 0.00005300  | H |
| O-O_3    | 0 | 0.13229000  | 0.07635000  | -1.74332300 | H |
| O-O_3    | 0 | 0.13760300  | 0.07687500  | 1.74291700  | H |
| C-C_3    | 0 | 0.98674400  | -5.15652300 | -2.63581500 | L |
| C-C_3    | 0 | 1.39024700  | -7.36759500 | -2.63598300 | L |
| C-C_R    | 0 | 1.29741200  | -6.94874000 | -1.19973800 | L |
| C-C_3    | 0 | 0.36659300  | -6.41168000 | -3.24106200 | L |
| H-H_     | 0 | 0.37280200  | -6.41020100 | -4.35608700 | L |
| H-H_     | 0 | -0.67169900 | -6.60004700 | -2.87770500 | L |
| C-C_3    | 0 | 2.42077600  | -5.24674800 | -3.19757500 | L |
| H-H_     | 0 | 2.45686900  | -4.84182200 | -4.23269500 | L |



|       |   |             |             |             |   |
|-------|---|-------------|-------------|-------------|---|
| H-H_  | 0 | 3.14670100  | -4.69569000 | -2.55989900 | L |
| C-C_3 | 0 | 2.70036400  | -6.77389600 | -3.19671500 | L |
| H-H_  | 0 | 2.87968100  | -7.14011900 | -4.23139400 | L |
| H-H_  | 0 | 3.57343600  | -7.03032700 | -2.55661700 | L |
| H-H_  | 0 | 0.44867300  | -4.20526800 | -2.83363900 | L |
| H-H_  | 0 | 1.22461100  | -8.44793000 | -2.83306200 | L |
| C-C_3 | 0 | -0.19152000 | -7.31006500 | 3.17637500  | L |
| C-C_3 | 0 | 1.23939800  | -7.40953300 | 2.60558100  | L |
| C-C_3 | 0 | 0.85041100  | -5.19596600 | 2.61800500  | L |
| C-C_3 | 0 | -0.45941700 | -5.78086200 | 3.18575700  | L |
| H-H_  | 0 | -0.92557800 | -7.85086900 | 2.53886700  | L |
| H-H_  | 0 | -0.22553800 | -7.72027800 | 4.20953100  | L |
| H-H_  | 0 | -1.33561100 | -5.51323400 | 2.55489300  | L |
| H-H_  | 0 | -0.62703700 | -5.41824400 | 4.22361300  | L |
| C-C_3 | 0 | 1.87173400  | -6.16048600 | 3.21203800  | L |
| H-H_  | 0 | 2.90837100  | -5.97507700 | 2.84245900  | L |
| H-H_  | 0 | 1.87292400  | -6.16624200 | 4.32705800  | L |
| C-C_R | 0 | 1.17149700  | -6.97809000 | 1.17165900  | L |
| C-C_R | 0 | 0.92941300  | -5.61152900 | 1.17805400  | L |
| H-H_  | 0 | 1.77095100  | -8.36610800 | 2.79482400  | L |
| H-H_  | 0 | 1.02607800  | -4.11798700 | 2.81963300  | L |
| C-C_R | 0 | 0.85895500  | -4.86458900 | -0.00804000 | L |
| C-C_R | 0 | 1.36618100  | -7.69530100 | -0.01611700 | L |
| H-H_  | 0 | 1.55880400  | -8.75973700 | -0.01908300 | L |
| C-C_R | 0 | 1.05013500  | -5.58316200 | -1.19832900 | L |
| C-C_3 | 0 | -5.21458400 | -0.72704200 | -2.61215300 | L |
| C-C_3 | 0 | -7.42658900 | -1.12503700 | -2.60633100 | L |
| C-C_R | 0 | -6.97804600 | -1.17651000 | -1.17696200 | L |
| C-C_3 | 0 | -6.47952600 | -0.04785000 | -3.12651700 | L |
| H-H_  | 0 | -6.50079400 | 0.05678300  | -4.23641400 | L |
| H-H_  | 0 | -6.65634700 | 0.94951600  | -2.65790100 | L |
| C-C_3 | 0 | -5.32114000 | -2.09850600 | -3.31035600 | L |
| H-H_  | 0 | -4.93646300 | -2.03347400 | -4.35176800 | L |
| H-H_  | 0 | -4.76039800 | -2.88423900 | -2.75701900 | L |
| C-C_3 | 0 | -6.84915000 | -2.37381700 | -3.30677900 | L |
| H-H_  | 0 | -7.23640800 | -2.44810300 | -4.34666200 | L |
| H-H_  | 0 | -7.09634800 | -3.30598000 | -2.75210300 | L |
| H-H_  | 0 | -4.26569500 | -0.17346800 | -2.77570200 | L |

|       |   |             |             |             |   |
|-------|---|-------------|-------------|-------------|---|
| H-H_  | 0 | -8.51009400 | -0.93891400 | -2.76345800 | L |
| C-C_3 | 0 | -7.24208000 | -0.10982700 | 3.31961800  | L |
| C-C_3 | 0 | -7.36037500 | -1.48389100 | 2.62565800  | L |
| C-C_3 | 0 | -5.14490900 | -1.10518100 | 2.62874800  | L |
| C-C_3 | 0 | -5.71155500 | 0.15129400  | 3.32147700  | L |
| H-H_  | 0 | -7.79185100 | 0.67995600  | 2.76131000  | L |
| H-H_  | 0 | -7.63120300 | -0.16677300 | 4.35989000  | L |
| H-H_  | 0 | -5.45185100 | 1.07841500  | 2.76383400  | L |
| H-H_  | 0 | -5.32729700 | 0.22577700  | 4.36240300  | L |
| C-C_3 | 0 | -6.10300100 | -2.17194900 | 3.14851300  | L |
| H-H_  | 0 | -5.93005900 | -3.17215500 | 2.68453200  | L |
| H-H_  | 0 | -6.08697500 | -2.27239900 | 4.25889200  | L |
| C-C_R | 0 | -6.95670300 | -1.28949600 | 1.19523400  | L |
| C-C_R | 0 | -5.58920600 | -1.05372500 | 1.19632900  | L |
| H-H_  | 0 | -8.31577000 | -2.02696100 | 2.78570300  | L |
| H-H_  | 0 | -4.06419500 | -1.30217800 | 2.79255900  | L |
| C-C_R | 0 | -4.86794300 | -0.86360600 | 0.00791300  | L |
| C-C_R | 0 | -7.70004500 | -1.36100400 | 0.00963500  | L |
| H-H_  | 0 | -8.76568900 | -1.54642100 | 0.01039500  | L |
| C-C_R | 0 | -5.61198000 | -0.93244100 | -1.17972500 | L |
| C-C_3 | 0 | 5.12171200  | 1.10114000  | 2.62957500  | L |
| C-C_3 | 0 | 7.33650600  | 1.48359600  | 2.63478500  | L |
| C-C_R | 0 | 6.93886200  | 1.28579000  | 1.20320800  | L |
| C-C_3 | 0 | 6.07589600  | 2.17047500  | 3.15130100  | L |
| H-H_  | 0 | 6.05529000  | 2.27291800  | 4.26141800  | L |
| H-H_  | 0 | 5.90321000  | 3.16954600  | 2.68477900  | L |
| C-C_3 | 0 | 5.68796700  | -0.15321100 | 3.32673000  | L |
| H-H_  | 0 | 5.29972000  | -0.22672800 | 4.36624700  | L |
| H-H_  | 0 | 5.43240500  | -1.08178000 | 2.76958700  | L |
| C-C_3 | 0 | 7.21799200  | 0.11071600  | 3.33077000  | L |
| H-H_  | 0 | 7.60274500  | 0.17047500  | 4.37251800  | L |
| H-H_  | 0 | 7.77169300  | -0.67903500 | 2.77630200  | L |
| H-H_  | 0 | 4.04003100  | 1.29634500  | 2.78900900  | L |
| H-H_  | 0 | 8.29034600  | 2.02864800  | 2.79748900  | L |
| C-C_3 | 0 | 6.84938800  | 2.37667300  | -3.29547300 | L |
| C-C_3 | 0 | 7.42437600  | 1.12623500  | -2.59614300 | L |
| C-C_3 | 0 | 5.21252000  | 0.72731400  | -2.61196000 | L |
| C-C_3 | 0 | 5.32150400  | 2.10073200  | -3.30609400 | L |

|       |   |             |             |             |   |
|-------|---|-------------|-------------|-------------|---|
| H-H_  | 0 | 7.09397700  | 3.30734200  | -2.73711200 | L |
| H-H_  | 0 | 7.24102600  | 2.45403500  | -4.33348200 | L |
| H-H_  | 0 | 4.75825600  | 2.88480000  | -2.75298700 | L |
| H-H_  | 0 | 4.94123000  | 2.03840700  | -4.34927500 | L |
| C-C_3 | 0 | 6.47995300  | 0.05007200  | -3.12303100 | L |
| H-H_  | 0 | 6.65549200  | -0.94845600 | -2.65640800 | L |
| H-H_  | 0 | 6.50597500  | -0.05152700 | -4.23311600 | L |
| C-C_R | 0 | 6.96985100  | 1.17373900  | -1.16864900 | L |
| C-C_R | 0 | 5.60382500  | 0.92906700  | -1.17730700 | L |
| H-H_  | 0 | 8.50864800  | 0.94097000  | -2.74913000 | L |
| H-H_  | 0 | 4.26460300  | 0.17372600  | -2.78092500 | L |
| C-C_R | 0 | 4.85466400  | 0.85955200  | 0.00730800  | L |
| C-C_R | 0 | 7.68673000  | 1.35899800  | 0.02075100  | L |
| H-H_  | 0 | 8.75196100  | 1.54692900  | 0.02580300  | L |
| C-C_R | 0 | 5.57158600  | 1.04825400  | 1.19886800  | L |
| C-C_3 | 0 | -0.98525800 | 5.15216300  | -2.63495800 | L |
| C-C_3 | 0 | -1.38287700 | 7.36423200  | -2.63415600 | L |
| C-C_R | 0 | -1.29786700 | 6.94346900  | -1.19803400 | L |
| C-C_3 | 0 | -0.35894400 | 6.40634700  | -3.23571600 | L |
| H-H_  | 0 | -0.35998300 | 6.40630000  | -4.35074700 | L |
| H-H_  | 0 | 0.67815600  | 6.59141600  | -2.86725700 | L |
| C-C_3 | 0 | -2.41651600 | 5.24686300  | -3.20299000 | L |
| H-H_  | 0 | -2.44914100 | 4.84321900  | -4.23872800 | L |
| H-H_  | 0 | -3.14670200 | 4.69704600  | -2.56903000 | L |
| C-C_3 | 0 | -2.69195800 | 6.77476300  | -3.20165300 | L |
| H-H_  | 0 | -2.86534100 | 7.14270500  | -4.23672500 | L |
| H-H_  | 0 | -3.56731600 | 7.03287800  | -2.56537500 | L |
| H-H_  | 0 | -0.44893100 | 4.19963700  | -2.83167600 | L |
| H-H_  | 0 | -1.21346500 | 8.44434100  | -2.82899700 | L |
| C-C_3 | 0 | 0.19931800  | 7.30056500  | 3.17208000  | L |
| C-C_3 | 0 | -1.23388200 | 7.40303400  | 2.60754500  | L |
| C-C_3 | 0 | -0.84969900 | 5.18857600  | 2.61892300  | L |
| C-C_3 | 0 | 0.46383600  | 5.77076000  | 3.18093600  | L |
| H-H_  | 0 | 0.93175500  | 7.83940900  | 2.53104800  | L |
| H-H_  | 0 | 0.23881400  | 7.71118900  | 4.20485900  | L |
| H-H_  | 0 | 1.33678400  | 5.50094500  | 2.54654400  | L |
| H-H_  | 0 | 0.63506000  | 5.40818400  | 4.21822700  | L |
| C-C_3 | 0 | -1.86626500 | 6.15549200  | 3.21713400  | L |

|       |   |             |            |             |   |
|-------|---|-------------|------------|-------------|---|
| H-H_  | 0 | -2.90491500 | 5.97222000 | 2.85217300  | L |
| H-H_  | 0 | -1.86256400 | 6.16163000 | 4.33214400  | L |
| C-C_R | 0 | -1.17307900 | 6.97112100 | 1.17352200  | L |
| C-C_R | 0 | -0.93414500 | 5.60420100 | 1.17926300  | L |
| H-H_  | 0 | -1.76259000 | 8.36076000 | 2.79867400  | L |
| H-H_  | 0 | -1.02689000 | 4.11099900 | 2.82157500  | L |
| C-C_R | 0 | -0.86459800 | 4.85810000 | -0.00726800 | L |
| C-C_R | 0 | -1.36447400 | 7.68961500 | -0.01400200 | L |
| H-H_  | 0 | -1.55153400 | 8.75494000 | -0.01657500 | L |
| C-C_R | 0 | -1.05410000 | 5.57736200 | -1.19726700 | L |

### **R\_1TS1 (OSS)**

|       |   |             |             |             |   |
|-------|---|-------------|-------------|-------------|---|
| C-C_R | 0 | 2.86447000  | -0.82186300 | -0.70090900 | H |
| C-C_R | 0 | 4.19330800  | -0.26750300 | -0.78223700 | H |
| C-C_R | 0 | 4.07223900  | 1.08109200  | -0.78509800 | H |
| C-C_R | 0 | 2.66526900  | 1.39293100  | -0.72709700 | H |
| N-N_R | 0 | 1.96946300  | 0.21294000  | -0.70369100 | H |
| C-C_R | 0 | 2.55954600  | -2.18205000 | -0.57468600 | H |
| C-C_R | 0 | 2.12648400  | 2.68301200  | -0.67859600 | H |
| C-C_R | 0 | 0.76127200  | 3.00455100  | -0.67029900 | H |
| C-C_R | 0 | 0.21359500  | 4.34281800  | -0.61820400 | H |
| C-C_R | 0 | -1.13187500 | 4.22160800  | -0.55921000 | H |
| C-C_R | 0 | -1.43893700 | 2.80584900  | -0.55455600 | H |
| N-N_R | 0 | -0.26790200 | 2.11846000  | -0.66593200 | H |
| C-C_R | 0 | -2.71834100 | 2.25958400  | -0.38343000 | H |
| C-C_R | 0 | -3.03271300 | 0.89613700  | -0.27603000 | H |
| C-C_R | 0 | -4.36530400 | 0.35547600  | -0.12168800 | H |
| C-C_R | 0 | -4.25384000 | -0.99361200 | -0.08866900 | H |
| C-C_R | 0 | -2.84801300 | -1.30918000 | -0.20516900 | H |
| N-N_R | 0 | -2.15429800 | -0.14444000 | -0.30877100 | H |
| C-C_R | 0 | -2.29748000 | -2.60056500 | -0.18156700 | H |
| C-C_R | 0 | -0.93221400 | -2.90516100 | -0.22878500 | H |
| C-C_R | 0 | -0.37536200 | -4.23391400 | -0.15907000 | H |
| C-C_R | 0 | 0.97076100  | -4.11924700 | -0.25624200 | H |
| C-C_R | 0 | 1.27737400  | -2.71734900 | -0.39716700 | H |
| N-N_R | 0 | 0.10492800  | -2.01317000 | -0.35508200 | H |
| H-H_  | 0 | 5.11571000  | -0.83845200 | -0.81508500 | H |

|          |   |             |             |             |   |
|----------|---|-------------|-------------|-------------|---|
| H-H_     | 0 | 4.87826000  | 1.80663200  | -0.82854100 | H |
| H-H_     | 0 | 0.78840900  | 5.26325000  | -0.62628300 | H |
| H-H_     | 0 | -1.85711700 | 5.02760600  | -0.50789200 | H |
| H-H_     | 0 | -5.28099500 | 0.93475800  | -0.05698700 | H |
| H-H_     | 0 | -5.05929100 | -1.71392600 | 0.01407300  | H |
| H-H_     | 0 | -0.94411700 | -5.15162400 | -0.04769700 | H |
| H-H_     | 0 | 1.69643900  | -4.92623600 | -0.24151000 | H |
| Ru-Ru6+2 | 0 | -0.07001000 | 0.03285200  | -0.57331000 | H |
| O-O_3    | 0 | -0.41887500 | -0.00518400 | -2.28828400 | H |
| O-O_3    | 0 | -0.04064600 | 0.38683700  | 1.24286300  | H |
| C-C_3    | 0 | -3.67278700 | -3.75922800 | -2.79687500 | L |
| C-C_3    | 0 | -5.15093400 | -5.45166400 | -2.81146900 | L |
| C-C_R    | 0 | -4.73078900 | -5.26163800 | -1.38518900 | L |
| C-C_3    | 0 | -5.09793700 | -4.00168000 | -3.28256700 | L |
| H-H_     | 0 | -5.20918200 | -3.89448200 | -4.38684700 | L |
| H-H_     | 0 | -5.84619300 | -3.35071500 | -2.77070500 | L |
| C-C_3    | 0 | -2.91781400 | -4.87094200 | -3.55427700 | L |
| H-H_     | 0 | -2.68486000 | -4.54343500 | -4.59121400 | L |
| H-H_     | 0 | -1.97523600 | -5.15259100 | -3.03412100 | L |
| C-C_3    | 0 | -3.93897000 | -6.04041800 | -3.56518800 | L |
| H-H_     | 0 | -4.22226600 | -6.30364300 | -4.60794200 | L |
| H-H_     | 0 | -3.53563900 | -6.94156000 | -3.05234500 | L |
| H-H_     | 0 | -3.28197000 | -2.72897600 | -2.93603400 | L |
| H-H_     | 0 | -6.11713400 | -5.97821500 | -2.96166500 | L |
| C-C_3    | 0 | -5.51182200 | -4.72113000 | 3.14164700  | L |
| C-C_3    | 0 | -4.76756300 | -5.85358500 | 2.40122300  | L |
| C-C_3    | 0 | -3.26186400 | -4.18713700 | 2.42644300  | L |
| C-C_3    | 0 | -4.46995400 | -3.57027700 | 3.16013300  | L |
| H-H_     | 0 | -6.44119500 | -4.42383400 | 2.60723800  | L |
| H-H_     | 0 | -5.76518700 | -5.03692000 | 4.17745700  | L |
| H-H_     | 0 | -4.84814700 | -2.66426100 | 2.63676600  | L |
| H-H_     | 0 | -4.19428400 | -3.30589000 | 4.20457000  | L |
| C-C_3    | 0 | -3.34597600 | -5.63230600 | 2.90563300  | L |
| H-H_     | 0 | -2.59980900 | -6.29714800 | 2.40879100  | L |
| H-H_     | 0 | -3.25167100 | -5.73370300 | 4.01205800  | L |
| C-C_R    | 0 | -4.59347000 | -5.40983700 | 0.98031300  | L |
| C-C_R    | 0 | -3.66670700 | -4.37625500 | 0.99449200  | L |
| H-H_     | 0 | -5.18015600 | -6.87547900 | 2.53844600  | L |

|       |   |             |             |             |   |
|-------|---|-------------|-------------|-------------|---|
| H-H_  | 0 | -2.28705300 | -3.68793800 | 2.58851100  | L |
| C-C_R | 0 | -3.25084900 | -3.73567900 | -0.18401500 | L |
| C-C_R | 0 | -5.15730500 | -5.89031500 | -0.20853600 | L |
| H-H_  | 0 | -5.87941800 | -6.69561200 | -0.21711500 | L |
| C-C_R | 0 | -3.81618000 | -4.21810300 | -1.37487700 | L |
| C-C_3 | 0 | -4.36445300 | 3.49925300  | -2.81605700 | L |
| C-C_3 | 0 | -6.07644100 | 4.93647200  | -2.57917600 | L |
| C-C_R | 0 | -5.60254600 | 4.60267100  | -1.19687100 | L |
| C-C_3 | 0 | -4.74268600 | 4.88877800  | -3.31854600 | L |
| H-H_  | 0 | -4.85318000 | 4.93937000  | -4.42693700 | L |
| H-H_  | 0 | -4.03075500 | 5.67955500  | -2.98178300 | L |
| C-C_3 | 0 | -5.57565500 | 2.67829400  | -3.30489700 | L |
| H-H_  | 0 | -5.44568900 | 2.39507000  | -4.37243100 | L |
| H-H_  | 0 | -5.72165200 | 1.76015300  | -2.69369100 | L |
| C-C_3 | 0 | -6.75856300 | 3.67064600  | -3.14135000 | L |
| H-H_  | 0 | -7.22662400 | 3.88826800  | -4.12643700 | L |
| H-H_  | 0 | -7.53040700 | 3.27680100  | -2.44358700 | L |
| H-H_  | 0 | -3.36718600 | 3.12427300  | -3.12972200 | L |
| H-H_  | 0 | -6.65328200 | 5.88067800  | -2.67435200 | L |
| C-C_3 | 0 | -4.28396900 | 5.58270700  | 3.13757100  | L |
| C-C_3 | 0 | -5.50196000 | 4.77923800  | 2.63244900  | L |
| C-C_3 | 0 | -3.80369900 | 3.32509300  | 2.40547900  | L |
| C-C_3 | 0 | -3.11117700 | 4.57730900  | 2.98091500  | L |
| H-H_  | 0 | -4.11957300 | 6.50157700  | 2.53230500  | L |
| H-H_  | 0 | -4.42044000 | 5.86221800  | 4.20531200  | L |
| H-H_  | 0 | -2.32676400 | 4.96396700  | 2.29314700  | L |
| H-H_  | 0 | -2.65575600 | 4.34757600  | 3.96917500  | L |
| C-C_3 | 0 | -5.14349200 | 3.38259000  | 3.13149400  | L |
| H-H_  | 0 | -5.85841200 | 2.59960700  | 2.78305000  | L |
| H-H_  | 0 | -5.04408200 | 3.32448600  | 4.24056200  | L |
| C-C_R | 0 | -5.31082500 | 4.57042700  | 1.16024600  | L |
| C-C_R | 0 | -4.26101800 | 3.67446200  | 1.01950100  | L |
| H-H_  | 0 | -6.49744300 | 5.16552800  | 2.93760100  | L |
| H-H_  | 0 | -3.23972300 | 2.37375600  | 2.50209000  | L |
| C-C_R | 0 | -3.84004300 | 3.21522800  | -0.23769100 | L |
| C-C_R | 0 | -6.02195600 | 5.06391600  | 0.05826400  | L |
| H-H_  | 0 | -6.84523100 | 5.75659700  | 0.16967000  | L |
| C-C_R | 0 | -4.54661400 | 3.71391200  | -1.34225300 | L |

|       |   |            |             |             |   |
|-------|---|------------|-------------|-------------|---|
| C-C_3 | 0 | 4.29417200 | -3.11811300 | 1.93141800  | L |
| C-C_3 | 0 | 6.05974900 | -4.50146200 | 1.79758400  | L |
| C-C_R | 0 | 5.49803600 | -4.38836100 | 0.41273800  | L |
| C-C_3 | 0 | 5.77320700 | -3.08929400 | 2.29995800  | L |
| H-H_  | 0 | 5.94950300 | -2.96763900 | 3.39428000  | L |
| H-H_  | 0 | 6.34229600 | -2.30629600 | 1.74444800  | L |
| C-C_3 | 0 | 3.82641200 | -4.35679400 | 2.72444600  | L |
| H-H_  | 0 | 3.62681000 | -4.08819200 | 3.78434600  | L |
| H-H_  | 0 | 2.91259100 | -4.80778500 | 2.27809200  | L |
| C-C_3 | 0 | 5.04521800 | -5.31299800 | 2.63035400  | L |
| H-H_  | 0 | 5.45646800 | -5.52489900 | 3.64172600  | L |
| H-H_  | 0 | 4.77743500 | -6.27061800 | 2.13137000  | L |
| H-H_  | 0 | 3.73073200 | -2.17980300 | 2.11736500  | L |
| H-H_  | 0 | 7.11659400 | -4.83666100 | 1.86142600  | L |
| C-C_3 | 0 | 5.89043200 | -3.60328800 | -4.11343100 | L |
| C-C_3 | 0 | 5.39557400 | -4.87378700 | -3.38913600 | L |
| C-C_3 | 0 | 3.62345900 | -3.49642700 | -3.26699100 | L |
| C-C_3 | 0 | 4.66598500 | -2.65234000 | -4.02907500 | L |
| H-H_  | 0 | 6.78308400 | -3.16738900 | -3.61252600 | L |
| H-H_  | 0 | 6.13607600 | -3.83290600 | -5.17351100 | L |
| H-H_  | 0 | 4.91107200 | -1.71400500 | -3.48396700 | L |
| H-H_  | 0 | 4.29247500 | -2.40220000 | -5.04624900 | L |
| C-C_3 | 0 | 3.93040400 | -4.88656700 | -3.81428100 | L |
| H-H_  | 0 | 3.33950300 | -5.68954100 | -3.31266500 | L |
| H-H_  | 0 | 3.79427300 | -4.96331400 | -4.91832400 | L |
| C-C_R | 0 | 5.22785100 | -4.51750300 | -1.94290200 | L |
| C-C_R | 0 | 4.13514600 | -3.66610000 | -1.86646900 | L |
| H-H_  | 0 | 5.96995900 | -5.80243300 | -3.59163600 | L |
| H-H_  | 0 | 2.56848300 | -3.16122500 | -3.35805000 | L |
| C-C_R | 0 | 3.69079600 | -3.13540600 | -0.64587800 | L |
| C-C_R | 0 | 5.95228000 | -4.90427800 | -0.80813700 | L |
| H-H_  | 0 | 6.81506700 | -5.55356900 | -0.87169700 | L |
| C-C_R | 0 | 4.40658500 | -3.53430800 | 0.49396000  | L |
| C-C_3 | 0 | 3.51592000 | 4.35480300  | -3.01954900 | L |
| C-C_3 | 0 | 5.01009800 | 5.99781500  | -2.67486300 | L |
| C-C_R | 0 | 4.56233300 | 5.53546500  | -1.32105900 | L |
| C-C_3 | 0 | 4.95240400 | 4.66980900  | -3.42384300 | L |
| H-H_  | 0 | 5.08372100 | 4.78116700  | -4.52549000 | L |

|       |   |             |             |             |   |
|-------|---|-------------|-------------|-------------|---|
| H-H_  | 0 | 5.68482400  | 3.92118300  | -3.03816000 | L |
| C-C_3 | 0 | 2.78690600  | 5.60396600  | -3.55618300 | L |
| H-H_  | 0 | 2.57294800  | 5.49046100  | -4.64158500 | L |
| H-H_  | 0 | 1.83618300  | 5.79043000  | -3.00965400 | L |
| C-C_3 | 0 | 3.81828200  | 6.73947500  | -3.31713500 | L |
| H-H_  | 0 | 4.12389900  | 7.20081800  | -4.28180900 | L |
| H-H_  | 0 | 3.41318600  | 7.52585800  | -2.64243900 | L |
| H-H_  | 0 | 3.11756400  | 3.37707400  | -3.36437900 | L |
| H-H_  | 0 | 5.98378900  | 6.53123500  | -2.70249900 | L |
| C-C_3 | 0 | 5.37478600  | 4.00694500  | 2.95802500  | L |
| C-C_3 | 0 | 4.62341500  | 5.27846500  | 2.50670100  | L |
| C-C_3 | 0 | 3.11274200  | 3.64822400  | 2.17202600  | L |
| C-C_3 | 0 | 4.32991000  | 2.88163700  | 2.72870000  | L |
| H-H_  | 0 | 6.29550600  | 3.83975100  | 2.35637400  | L |
| H-H_  | 0 | 5.64388200  | 4.07788300  | 4.03477100  | L |
| H-H_  | 0 | 4.69843600  | 2.11814200  | 2.00865700  | L |
| H-H_  | 0 | 4.06892200  | 2.38669700  | 3.68961000  | L |
| C-C_3 | 0 | 3.20758100  | 4.94526200  | 2.96827200  | L |
| H-H_  | 0 | 2.45594000  | 5.70552000  | 2.64813300  | L |
| H-H_  | 0 | 3.12932000  | 4.79005300  | 4.06978100  | L |
| C-C_R | 0 | 4.42992000  | 5.17243200  | 1.02354300  | L |
| C-C_R | 0 | 3.50020300  | 4.16499200  | 0.81611500  | L |
| H-H_  | 0 | 5.03996800  | 6.24205600  | 2.86897200  | L |
| H-H_  | 0 | 2.13954300  | 3.11524000  | 2.22744200  | L |
| C-C_R | 0 | 3.07870500  | 3.79645100  | -0.47059200 | L |
| C-C_R | 0 | 4.99852800  | 5.89065500  | -0.03689000 | L |
| H-H_  | 0 | 5.73701400  | 6.66425000  | 0.12493300  | L |
| C-C_R | 0 | 3.63741800  | 4.52192900  | -1.53329500 | L |
| C-C_R | 0 | 2.75046400  | -1.15099400 | 4.90037500  | H |
| C-C_R | 0 | 1.65163400  | -1.58543100 | 4.17311800  | H |
| C-C_R | 0 | 0.54297700  | -0.75153600 | 3.96403800  | H |
| C-C_R | 0 | 0.57794500  | 0.54458600  | 4.50418800  | H |
| C-C_R | 0 | 1.67810100  | 0.98101400  | 5.22794100  | H |
| C-C_R | 0 | 2.76861200  | 0.13697000  | 5.43053900  | H |
| H-H_  | 0 | 3.59950300  | -1.81585000 | 5.05233100  | H |
| H-H_  | 0 | 1.63202700  | -2.58923500 | 3.74784900  | H |
| H-H_  | 0 | -0.25578500 | 1.22274600  | 4.32734100  | H |
| H-H_  | 0 | 1.69260900  | 1.99345900  | 5.62912500  | H |



|       |   |             |             |            |   |
|-------|---|-------------|-------------|------------|---|
| H-H_  | 0 | 3.63265900  | 0.48538800  | 5.99408100 | H |
| C-C_3 | 0 | -0.55205100 | -1.20142600 | 3.09944600 | H |
| C-C_3 | 0 | -1.96705900 | -0.75494300 | 3.35930000 | H |
| H-H_  | 0 | -0.45069200 | -2.25286500 | 2.80166800 | H |
| H-H_  | 0 | -0.27775900 | -0.54599300 | 2.03017800 | H |
| H-H_  | 0 | -2.62890900 | -1.07562900 | 2.54334900 | H |
| H-H_  | 0 | -2.35978300 | -1.17012400 | 4.29993900 | H |
| H-H_  | 0 | -2.03716200 | 0.33872700  | 3.41852700 | H |

**R\_1INT (OSS)**

|       |   |             |             |             |   |
|-------|---|-------------|-------------|-------------|---|
| C-C_R | 0 | -0.28562400 | -2.99142000 | -0.56517100 | H |
| C-C_R | 0 | 0.42321400  | -4.23846900 | -0.36982100 | H |
| C-C_R | 0 | 1.74394200  | -3.95180000 | -0.33494400 | H |
| C-C_R | 0 | 1.87346200  | -2.51918000 | -0.49185000 | H |
| N-N_R | 0 | 0.63463700  | -1.98771700 | -0.64040100 | H |
| C-C_R | 0 | -1.67663400 | -2.85690800 | -0.66603200 | H |
| C-C_R | 0 | 3.08078000  | -1.80300400 | -0.46619900 | H |
| C-C_R | 0 | 3.20064000  | -0.41024200 | -0.47716500 | H |
| C-C_R | 0 | 4.44532600  | 0.31965500  | -0.48598800 | H |
| C-C_R | 0 | 4.14705400  | 1.63797200  | -0.41660700 | H |
| C-C_R | 0 | 2.71095400  | 1.75582600  | -0.35439800 | H |
| N-N_R | 0 | 2.17310100  | 0.49914600  | -0.42874200 | H |
| C-C_R | 0 | 1.99882600  | 2.94899500  | -0.19194100 | H |
| C-C_R | 0 | 0.60300000  | 3.05978200  | -0.14124700 | H |
| C-C_R | 0 | -0.13117400 | 4.27510000  | 0.10285200  | H |
| C-C_R | 0 | -1.45132100 | 3.97889700  | 0.02084000  | H |
| C-C_R | 0 | -1.56499200 | 2.57323100  | -0.27313600 | H |
| N-N_R | 0 | -0.29594000 | 2.04524500  | -0.33796500 | H |
| C-C_R | 0 | -2.76514700 | 1.88997400  | -0.50068100 | H |
| C-C_R | 0 | -2.88344500 | 0.50717600  | -0.70837500 | H |
| C-C_R | 0 | -4.10470400 | -0.20772400 | -0.99509700 | H |
| C-C_R | 0 | -3.79797900 | -1.52630700 | -1.02875300 | H |
| C-C_R | 0 | -2.38226500 | -1.64818500 | -0.77196600 | H |
| N-N_R | 0 | -1.86923800 | -0.39602200 | -0.60765700 | H |
| H-H_  | 0 | -0.03289000 | -5.21710900 | -0.26183000 | H |
| H-H_  | 0 | 2.56114900  | -4.65264900 | -0.19823700 | H |
| H-H_  | 0 | 5.43524300  | -0.12192800 | -0.54000500 | H |
| H-H_  | 0 | 4.84939900  | 2.46523100  | -0.40751700 | H |

|          |   |             |             |             |   |
|----------|---|-------------|-------------|-------------|---|
| H-H_     | 0 | 0.30635100  | 5.24573100  | 0.31393200  | H |
| H-H_     | 0 | -2.28170700 | 4.66602300  | 0.14856400  | H |
| H-H_     | 0 | -5.08117900 | 0.23912600  | -1.15118000 | H |
| H-H_     | 0 | -4.47753800 | -2.35028700 | -1.22225000 | H |
| Ru-Ru6+2 | 0 | 0.17965900  | 0.06260000  | -0.59360900 | H |
| O-O_3    | 0 | 0.07320000  | -0.01212900 | -2.33135900 | H |
| O-O_3    | 0 | 0.06167800  | -0.34444100 | 1.30786000  | H |
| C-C_3    | 0 | -3.57869300 | 3.71727600  | -2.97166200 | L |
| C-C_3    | 0 | -5.53318900 | 4.81241000  | -3.14737600 | L |
| C-C_R    | 0 | -5.53052800 | 4.15217200  | -1.80175900 | L |
| C-C_3    | 0 | -4.04780700 | 5.13720900  | -3.26934900 | L |
| H-H_     | 0 | -3.75753500 | 5.49100000  | -4.28616300 | L |
| H-H_     | 0 | -3.70050500 | 5.87598900  | -2.50832500 | L |
| C-C_3    | 0 | -4.31607100 | 2.93392900  | -4.07739800 | L |
| H-H_     | 0 | -3.74862900 | 2.98537300  | -5.03243500 | L |
| H-H_     | 0 | -4.46664700 | 1.86881700  | -3.79257100 | L |
| C-C_3    | 0 | -5.66584700 | 3.69123600  | -4.20031800 | L |
| H-H_     | 0 | -5.77979100 | 4.12679200  | -5.21726600 | L |
| H-H_     | 0 | -6.53052700 | 3.02557300  | -3.98363400 | L |
| H-H_     | 0 | -2.47864100 | 3.57214200  | -2.92806900 | L |
| H-H_     | 0 | -6.22958300 | 5.67008600  | -3.26024700 | L |
| C-C_3    | 0 | -6.35527400 | 3.66508900  | 2.75176000  | L |
| C-C_3    | 0 | -7.00626100 | 2.97987300  | 1.53302900  | L |
| C-C_3    | 0 | -5.05090600 | 1.89320600  | 1.73578100  | L |
| C-C_3    | 0 | -5.00237000 | 2.91836600  | 2.88916300  | L |
| H-H_     | 0 | -6.20742900 | 4.75423500  | 2.57964800  | L |
| H-H_     | 0 | -6.97993000 | 3.51507500  | 3.65960700  | L |
| H-H_     | 0 | -4.14046900 | 3.61386400  | 2.78262700  | L |
| H-H_     | 0 | -4.94044800 | 2.39786400  | 3.86974200  | L |
| C-C_3    | 0 | -6.53425800 | 1.54251000  | 1.73106800  | L |
| H-H_     | 0 | -6.81794500 | 0.87125600  | 0.88593100  | L |
| H-H_     | 0 | -6.88106400 | 1.09394300  | 2.69117100  | L |
| C-C_R    | 0 | -6.18492400 | 3.34682400  | 0.33375800  | L |
| C-C_R    | 0 | -4.97713600 | 2.67130800  | 0.45330400  | L |
| H-H_     | 0 | -8.10249600 | 3.12230800  | 1.42643100  | L |
| H-H_     | 0 | -4.35225700 | 1.03478300  | 1.82347900  | L |
| C-C_R    | 0 | -4.01045500 | 2.69313400  | -0.56742400 | L |
| C-C_R    | 0 | -6.50984100 | 4.09867400  | -0.80241400 | L |

|       |   |             |             |             |   |
|-------|---|-------------|-------------|-------------|---|
| H-H_  | 0 | -7.46624600 | 4.59252000  | -0.90959100 | L |
| C-C_R | 0 | -4.32410400 | 3.47591400  | -1.69065600 | L |
| C-C_3 | 0 | 2.60659900  | 4.96364000  | -2.58373600 | L |
| C-C_3 | 0 | 3.76620800  | 6.87596900  | -2.36161100 | L |
| C-C_R | 0 | 3.70169500  | 6.25290200  | -0.99981600 | L |
| C-C_3 | 0 | 3.83732000  | 5.61050700  | -3.21097800 | L |
| H-H_  | 0 | 3.72171700  | 5.80740000  | -4.30241800 | L |
| H-H_  | 0 | 4.77068800  | 5.02343400  | -3.03861700 | L |
| C-C_3 | 0 | 1.54391700  | 6.04775700  | -2.86003200 | L |
| H-H_  | 0 | 1.15067700  | 5.94834100  | -3.89555100 | L |
| H-H_  | 0 | 0.69953700  | 5.99107200  | -2.13931000 | L |
| C-C_3 | 0 | 2.34371000  | 7.36873000  | -2.70273400 | L |
| H-H_  | 0 | 2.35007900  | 7.93912100  | -3.65742500 | L |
| H-H_  | 0 | 1.92587500  | 8.00684500  | -1.89281900 | L |
| H-H_  | 0 | 2.35917300  | 3.94197900  | -2.94229700 | L |
| H-H_  | 0 | 4.58342500  | 7.61225500  | -2.51458400 | L |
| C-C_3 | 0 | 5.50071700  | 4.82144300  | 3.03944000  | L |
| C-C_3 | 0 | 4.43496200  | 5.89829700  | 2.74535600  | L |
| C-C_3 | 0 | 3.28653000  | 3.97906300  | 2.53624700  | L |
| C-C_3 | 0 | 4.70641900  | 3.49574800  | 2.89772900  | L |
| H-H_  | 0 | 6.34526800  | 4.87254000  | 2.31704600  | L |
| H-H_  | 0 | 5.89121500  | 4.93562500  | 4.07446400  | L |
| H-H_  | 0 | 5.13442300  | 2.84358000  | 2.10586700  | L |
| H-H_  | 0 | 4.69196600  | 2.94194700  | 3.86206300  | L |
| C-C_3 | 0 | 3.20139700  | 5.25270800  | 3.37005400  | L |
| H-H_  | 0 | 2.26546900  | 5.83106600  | 3.18259800  | L |
| H-H_  | 0 | 3.30847500  | 5.06852500  | 4.46453800  | L |
| C-C_R | 0 | 4.07031500  | 5.77236200  | 1.29675500  | L |
| C-C_R | 0 | 3.35937800  | 4.58753400  | 1.16592100  | L |
| H-H_  | 0 | 4.67601300  | 6.92535700  | 3.09231700  | L |
| H-H_  | 0 | 2.47521300  | 3.24010000  | 2.69239400  | L |
| C-C_R | 0 | 2.78414000  | 4.19796300  | -0.05462700 | L |
| C-C_R | 0 | 4.26652600  | 6.64703300  | 0.22007200  | L |
| H-H_  | 0 | 4.81875600  | 7.57120900  | 0.32476300  | L |
| C-C_R | 0 | 2.98453600  | 5.07256600  | -1.13469600 | L |
| C-C_3 | 0 | -3.21420400 | -3.76953400 | 1.96344800  | L |
| C-C_3 | 0 | -4.44505300 | -5.64329900 | 2.12460600  | L |
| C-C_R | 0 | -3.91940100 | -5.59476200 | 0.72113000  | L |

|       |   |             |             |             |   |
|-------|---|-------------|-------------|-------------|---|
| C-C_3 | 0 | -3.26771000 | -5.00396900 | 2.85640800  | L |
| H-H_  | 0 | -3.49011900 | -4.76413300 | 3.92253100  | L |
| H-H_  | 0 | -2.33731300 | -5.61772100 | 2.80255900  | L |
| C-C_3 | 0 | -4.65093000 | -3.23043100 | 2.13889900  | L |
| H-H_  | 0 | -4.73265400 | -2.62851300 | 3.06813100  | L |
| H-H_  | 0 | -4.96938200 | -2.60812400 | 1.27611300  | L |
| C-C_3 | 0 | -5.49969800 | -4.52435600 | 2.25134200  | L |
| H-H_  | 0 | -6.00360700 | -4.57765600 | 3.24136400  | L |
| H-H_  | 0 | -6.26223200 | -4.58611700 | 1.44360200  | L |
| H-H_  | 0 | -2.39742600 | -3.04823000 | 2.18012000  | L |
| H-H_  | 0 | -4.75640300 | -6.64607300 | 2.48622900  | L |
| C-C_3 | 0 | -2.07224600 | -7.29307100 | -3.21736600 | L |
| C-C_3 | 0 | -3.47692500 | -6.73274300 | -2.91005100 | L |
| C-C_3 | 0 | -2.21833000 | -4.87910800 | -3.07889500 | L |
| C-C_3 | 0 | -1.20416700 | -6.01246400 | -3.33962500 | L |
| H-H_  | 0 | -1.70918200 | -7.95829300 | -2.40286800 | L |
| H-H_  | 0 | -2.08070100 | -7.85402400 | -4.17761200 | L |
| H-H_  | 0 | -0.37645500 | -6.00591100 | -2.59831600 | L |
| H-H_  | 0 | -0.78017300 | -5.92289400 | -4.36385200 | L |
| C-C_3 | 0 | -3.46195100 | -5.45684500 | -3.74653600 | L |
| H-H_  | 0 | -4.36930900 | -4.82547900 | -3.59255800 | L |
| H-H_  | 0 | -3.32635100 | -5.64828100 | -4.83663100 | L |
| C-C_R | 0 | -3.42032100 | -6.12743200 | -1.53984000 | L |
| C-C_R | 0 | -2.64184300 | -4.98205900 | -1.64176600 | L |
| H-H_  | 0 | -4.32494700 | -7.42586900 | -3.09404500 | L |
| H-H_  | 0 | -1.91019100 | -3.86792500 | -3.41968500 | L |
| C-C_R | 0 | -2.48622500 | -4.09413500 | -0.56461800 | L |
| C-C_R | 0 | -4.08933000 | -6.47207500 | -0.35760500 | L |
| H-H_  | 0 | -4.71302500 | -7.35303500 | -0.28727700 | L |
| C-C_R | 0 | -3.15537400 | -4.44157400 | 0.62088200  | L |
| C-C_3 | 0 | 4.45829600  | -3.43833900 | -2.83593400 | L |
| C-C_3 | 0 | 6.31672000  | -4.67893700 | -2.59779600 | L |
| C-C_R | 0 | 6.05446000  | -4.04029900 | -1.26728500 | L |
| C-C_3 | 0 | 4.87878500  | -4.88648300 | -3.06334000 | L |
| H-H_  | 0 | 4.80397400  | -5.20257300 | -4.12998900 | L |
| H-H_  | 0 | 4.31448300  | -5.60651600 | -2.42401300 | L |
| C-C_3 | 0 | 5.48371600  | -2.69909500 | -3.72011900 | L |
| H-H_  | 0 | 5.14787800  | -2.69342700 | -4.78028500 | L |

|       |   |             |             |             |   |
|-------|---|-------------|-------------|-------------|---|
| H-H_  | 0 | 5.64147500  | -1.65285300 | -3.37564200 | L |
| C-C_3 | 0 | 6.76758700  | -3.55652400 | -3.55672300 | L |
| H-H_  | 0 | 7.07987800  | -3.98497800 | -4.53435300 | L |
| H-H_  | 0 | 7.60526700  | -2.96302600 | -3.12803900 | L |
| H-H_  | 0 | 3.39130800  | -3.20628200 | -3.03823900 | L |
| H-H_  | 0 | 6.95832100  | -5.58519500 | -2.57759000 | L |
| C-C_3 | 0 | 5.47866200  | -4.18878800 | 3.29809600  | L |
| C-C_3 | 0 | 6.53389900  | -3.40848400 | 2.48459100  | L |
| C-C_3 | 0 | 4.68459400  | -2.15190700 | 2.25648300  | L |
| C-C_3 | 0 | 4.20112000  | -3.32074300 | 3.13926400  | L |
| H-H_  | 0 | 5.32889500  | -5.21558300 | 2.89690600  | L |
| H-H_  | 0 | 5.78085900  | -4.24932900 | 4.36666500  | L |
| H-H_  | 0 | 3.37662300  | -3.88722600 | 2.65186100  | L |
| H-H_  | 0 | 3.85701700  | -2.94314400 | 4.12714500  | L |
| C-C_3 | 0 | 6.10703500  | -1.97305600 | 2.77600700  | L |
| H-H_  | 0 | 6.68877300  | -1.21964000 | 2.19330600  | L |
| H-H_  | 0 | 6.14872300  | -1.71372500 | 3.85966200  | L |
| C-C_R | 0 | 6.13065400  | -3.49701200 | 1.04347200  | L |
| C-C_R | 0 | 4.98876400  | -2.72234400 | 0.90127200  | L |
| H-H_  | 0 | 7.59447600  | -3.65521000 | 2.70270000  | L |
| H-H_  | 0 | 4.04747000  | -1.24234700 | 2.26883900  | L |
| C-C_R | 0 | 4.32892700  | -2.58994400 | -0.33089100 | L |
| C-C_R | 0 | 6.70170900  | -4.18767000 | -0.03323800 | L |
| H-H_  | 0 | 7.58202400  | -4.80531400 | 0.08317000  | L |
| C-C_R | 0 | 4.90663100  | -3.27301700 | -1.41286900 | L |
| C-C_R | 0 | -2.88957800 | -1.61164300 | 5.05367800  | H |
| C-C_R | 0 | -2.77546300 | -0.38664500 | 4.42421200  | H |
| C-C_R | 0 | -1.50505800 | 0.16455000  | 4.10934000  | H |
| C-C_R | 0 | -0.35927800 | -0.60044800 | 4.45571200  | H |
| C-C_R | 0 | -0.48659200 | -1.83352400 | 5.06887100  | H |
| C-C_R | 0 | -1.74760400 | -2.34974500 | 5.37639800  | H |
| H-H_  | 0 | -3.87536500 | -2.00409700 | 5.29970500  | H |
| H-H_  | 0 | -3.67001700 | 0.18268700  | 4.17017400  | H |
| H-H_  | 0 | 0.62910900  | -0.21828100 | 4.20715000  | H |
| H-H_  | 0 | 0.40766300  | -2.40651400 | 5.31052900  | H |
| H-H_  | 0 | -1.84117800 | -3.31986100 | 5.86148100  | H |
| C-C_R | 0 | -1.40596100 | 1.42502700  | 3.47640800  | H |
| C-C_3 | 0 | -0.12925000 | 2.14590700  | 3.22364300  | H |

|      |   |             |             |            |   |
|------|---|-------------|-------------|------------|---|
| H-H_ | 0 | -2.33987500 | 1.92897600  | 3.22593700 | H |
| H-H_ | 0 | -0.81795700 | -0.12351800 | 1.66477900 | H |
| H-H_ | 0 | -0.30460600 | 3.08817200  | 2.69018700 | H |
| H-H_ | 0 | 0.39722300  | 2.38460600  | 4.16296400 | H |
| H-H_ | 0 | 0.56030900  | 1.54170500  | 2.61142500 | H |

**S\_1TS1 (OSS)**

|       |   |             |             |             |   |
|-------|---|-------------|-------------|-------------|---|
| C-C_R | 0 | 1.55853900  | 2.53910700  | -0.66855300 | H |
| C-C_R | 0 | 1.47084300  | 3.97850300  | -0.69394000 | H |
| C-C_R | 0 | 0.17893900  | 4.31536300  | -0.46568300 | H |
| C-C_R | 0 | -0.57242000 | 3.09195900  | -0.32824800 | H |
| N-N_R | 0 | 0.29578400  | 2.04105600  | -0.45799700 | H |
| C-C_R | 0 | 2.73678400  | 1.79144900  | -0.78336200 | H |
| C-C_R | 0 | -1.95513700 | 3.00972000  | -0.11764400 | H |
| C-C_R | 0 | -2.71720600 | 1.83379300  | -0.12527100 | H |
| C-C_R | 0 | -4.15221900 | 1.76061900  | 0.02372800  | H |
| C-C_R | 0 | -4.50448400 | 0.45850200  | -0.08702400 | H |
| C-C_R | 0 | -3.29254200 | -0.30510500 | -0.27790300 | H |
| N-N_R | 0 | -2.24112800 | 0.56891600  | -0.30504200 | H |
| C-C_R | 0 | -3.22176000 | -1.69989200 | -0.37428900 | H |
| C-C_R | 0 | -2.04355100 | -2.46040200 | -0.42955600 | H |
| C-C_R | 0 | -1.97230900 | -3.90617800 | -0.43479800 | H |
| C-C_R | 0 | -0.66274500 | -4.24255800 | -0.39664900 | H |
| C-C_R | 0 | 0.09963500  | -3.01080900 | -0.38602500 | H |
| N-N_R | 0 | -0.77688800 | -1.97179500 | -0.42120700 | H |
| C-C_R | 0 | 1.49921900  | -2.91986100 | -0.34822500 | H |
| C-C_R | 0 | 2.25758000  | -1.74251400 | -0.43238300 | H |
| C-C_R | 0 | 3.69936700  | -1.67924000 | -0.48807400 | H |
| C-C_R | 0 | 4.04441100  | -0.37843400 | -0.65091700 | H |
| C-C_R | 0 | 2.82208900  | 0.39151600  | -0.67626700 | H |
| N-N_R | 0 | 1.77522700  | -0.46780000 | -0.53027200 | H |
| H-H_  | 0 | 2.29842900  | 4.66091500  | -0.85800500 | H |
| H-H_  | 0 | -0.23197500 | 5.31867300  | -0.41521400 | H |
| H-H_  | 0 | -4.81532100 | 2.60455200  | 0.18431500  | H |
| H-H_  | 0 | -5.50748100 | 0.04788900  | -0.02895900 | H |
| H-H_  | 0 | -2.82071800 | -4.58279100 | -0.45236300 | H |
| H-H_  | 0 | -0.24742000 | -5.24530200 | -0.38438400 | H |
| H-H_  | 0 | 4.37355000  | -2.52724500 | -0.42172000 | H |

|          |   |             |             |             |   |
|----------|---|-------------|-------------|-------------|---|
| H-H_     | 0 | 5.04946900  | 0.02244000  | -0.73687800 | H |
| Ru-Ru6+2 | 0 | -0.24425800 | 0.05723600  | -0.47102800 | H |
| O-O_3    | 0 | -0.31008500 | -0.11453400 | -2.21449300 | H |
| O-O_3    | 0 | -0.17437900 | -0.16330800 | 1.37242100  | H |
| C-C_3    | 0 | 2.53044700  | -4.67452600 | -2.79821200 | L |
| C-C_3    | 0 | 3.59018600  | -6.64421400 | -2.58268500 | L |
| C-C_R    | 0 | 3.35755000  | -6.12903800 | -1.19433500 | L |
| C-C_3    | 0 | 2.32991000  | -6.11419900 | -3.25974100 | L |
| H-H_     | 0 | 2.34752500  | -6.22587200 | -4.36901900 | L |
| H-H_     | 0 | 1.39495700  | -6.57171100 | -2.85702000 | L |
| C-C_3    | 0 | 3.92926400  | -4.38030900 | -3.37848600 | L |
| H-H_     | 0 | 3.85079700  | -4.09367900 | -4.45014600 | L |
| H-H_     | 0 | 4.44526000  | -3.57076800 | -2.81706700 | L |
| C-C_3    | 0 | 4.66247100  | -5.74026000 | -3.22766000 | L |
| H-H_     | 0 | 4.95724000  | -6.13909500 | -4.22308100 | L |
| H-H_     | 0 | 5.56453800  | -5.65028100 | -2.58275900 | L |
| H-H_     | 0 | 1.72999200  | -3.95827200 | -3.08076800 | L |
| H-H_     | 0 | 3.76524200  | -7.73772700 | -2.66615900 | L |
| C-C_3    | 0 | 1.80238200  | -6.58606600 | 3.13006300  | L |
| C-C_3    | 0 | 3.23297900  | -6.28215100 | 2.63545200  | L |
| C-C_3    | 0 | 2.19235300  | -4.30002600 | 2.43255600  | L |
| C-C_3    | 0 | 1.08514300  | -5.21610900 | 2.99237700  | L |
| H-H_     | 0 | 1.31232700  | -7.36918100 | 2.51017000  | L |
| H-H_     | 0 | 1.82154200  | -6.91317600 | 4.19281300  | L |
| H-H_     | 0 | 0.21391200  | -5.27555200 | 2.30371800  | L |
| H-H_     | 0 | 0.74603200  | -4.84873100 | 3.98583000  | L |
| C-C_3    | 0 | 3.41328100  | -4.86003100 | 3.15563500  | L |
| H-H_     | 0 | 4.36931400  | -4.39535800 | 2.81680600  | L |
| H-H_     | 0 | 3.33888700  | -4.78501200 | 4.26564400  | L |
| C-C_R    | 0 | 3.13992400  | -5.99466400 | 1.16722900  | L |
| C-C_R    | 0 | 2.49482300  | -4.77302100 | 1.04067100  | L |
| H-H_     | 0 | 4.01455500  | -7.01269700 | 2.93331900  | L |
| H-H_     | 0 | 2.01678000  | -3.20934200 | 2.54349000  | L |
| C-C_R    | 0 | 2.24449700  | -4.19211300 | -0.21188700 | L |
| C-C_R    | 0 | 3.58994000  | -6.71871800 | 0.05548300  | L |
| H-H_     | 0 | 4.07684100  | -7.67943900 | 0.15525800  | L |
| C-C_R    | 0 | 2.70508500  | -4.91087100 | -1.32618000 | L |
| C-C_3    | 0 | -4.99580900 | -2.28545100 | -2.95210900 | L |

|       |   |             |             |             |   |
|-------|---|-------------|-------------|-------------|---|
| C-C_3 | 0 | -6.92119300 | -3.44504200 | -2.92491600 | L |
| C-C_R | 0 | -6.42442500 | -3.40532600 | -1.51126300 | L |
| C-C_3 | 0 | -6.43959600 | -2.07658600 | -3.39721000 | L |
| H-H_  | 0 | -6.54253900 | -1.93079000 | -4.49787000 | L |
| H-H_  | 0 | -6.93903500 | -1.23259700 | -2.86446300 | L |
| C-C_3 | 0 | -4.63823500 | -3.56807600 | -3.73114500 | L |
| H-H_  | 0 | -4.34454200 | -3.31821100 | -4.77424000 | L |
| H-H_  | 0 | -3.81336500 | -4.12934000 | -3.23840900 | L |
| C-C_3 | 0 | -5.96817900 | -4.36922600 | -3.71316500 | L |
| H-H_  | 0 | -6.34658300 | -4.52387900 | -4.74744800 | L |
| H-H_  | 0 | -5.84601000 | -5.35510500 | -3.21232300 | L |
| H-H_  | 0 | -4.31258400 | -1.42247000 | -3.10052300 | L |
| H-H_  | 0 | -8.00592400 | -3.64919200 | -3.04742900 | L |
| C-C_3 | 0 | -6.80676100 | -2.82484500 | 3.07429000  | L |
| C-C_3 | 0 | -6.47219200 | -4.09303900 | 2.25993500  | L |
| C-C_3 | 0 | -4.53646900 | -2.95145100 | 2.24042000  | L |
| C-C_3 | 0 | -5.46926000 | -2.03655500 | 3.06040600  | L |
| H-H_  | 0 | -7.63070300 | -2.24236700 | 2.60572500  | L |
| H-H_  | 0 | -7.09070300 | -3.09663000 | 4.11465100  | L |
| H-H_  | 0 | -5.58542400 | -1.03781700 | 2.58402100  | L |
| H-H_  | 0 | -5.07723900 | -1.91033200 | 4.09343000  | L |
| C-C_3 | 0 | -5.02529200 | -4.32617300 | 2.68421100  | L |
| H-H_  | 0 | -4.53739300 | -5.16008100 | 2.12547900  | L |
| H-H_  | 0 | -4.91148100 | -4.49950500 | 3.77978100  | L |
| C-C_R | 0 | -6.24554200 | -3.65818300 | 0.84341100  | L |
| C-C_R | 0 | -5.05112100 | -2.95175300 | 0.83050800  | L |
| H-H_  | 0 | -7.16405500 | -4.95132700 | 2.39413200  | L |
| H-H_  | 0 | -3.44837700 | -2.76225300 | 2.35823200  | L |
| C-C_R | 0 | -4.50176700 | -2.44397100 | -0.35707400 | L |
| C-C_R | 0 | -6.97219100 | -3.91525800 | -0.32672700 | L |
| H-H_  | 0 | -7.89666600 | -4.47673600 | -0.31684100 | L |
| C-C_R | 0 | -5.23484100 | -2.69100600 | -1.52735600 | L |
| C-C_3 | 0 | 4.25085100  | 3.51780500  | 1.44748400  | L |
| C-C_3 | 0 | 6.24566800  | 4.50178600  | 1.13698800  | L |
| C-C_R | 0 | 5.87296200  | 3.86452900  | -0.16757100 | L |
| C-C_3 | 0 | 4.85818200  | 4.90546100  | 1.62089300  | L |
| H-H_  | 0 | 4.84721300  | 5.25981100  | 2.67810000  | L |
| H-H_  | 0 | 4.37653100  | 5.67287700  | 0.96928400  | L |



|       |   |             |            |             |   |
|-------|---|-------------|------------|-------------|---|
| C-C_3 | 0 | 5.18982900  | 2.67907200 | 2.33770500  | L |
| H-H_  | 0 | 4.87616300  | 2.74493500 | 3.40264200  | L |
| H-H_  | 0 | 5.20760200  | 1.61310900 | 2.02169000  | L |
| C-C_3 | 0 | 6.56887000  | 3.35940900 | 2.12456500  | L |
| H-H_  | 0 | 6.95374700  | 3.77288000 | 3.08252800  | L |
| H-H_  | 0 | 7.31437700  | 2.65052700 | 1.70102800  | L |
| H-H_  | 0 | 3.16872500  | 3.44762200 | 1.67751700  | L |
| H-H_  | 0 | 6.99681200  | 5.31749300 | 1.07612500  | L |
| C-C_3 | 0 | 5.40442100  | 3.58056100 | -4.78171900 | L |
| C-C_3 | 0 | 6.33861400  | 2.81336200 | -3.82216300 | L |
| C-C_3 | 0 | 4.35912800  | 1.79392700 | -3.52455000 | L |
| C-C_3 | 0 | 4.03648000  | 2.87667200 | -4.57491400 | L |
| H-H_  | 0 | 5.35211100  | 4.66195500 | -4.52567000 | L |
| H-H_  | 0 | 5.74970000  | 3.46525100 | -5.83260100 | L |
| H-H_  | 0 | 3.26111600  | 3.58488900 | -4.20706200 | L |
| H-H_  | 0 | 3.68985800  | 2.40677400 | -5.52140700 | L |
| C-C_3 | 0 | 5.77176300  | 1.40254700 | -3.94439900 | L |
| H-H_  | 0 | 6.24819700  | 0.67994000 | -3.23985400 | L |
| H-H_  | 0 | 5.82441800  | 0.99647000 | -4.98149300 | L |
| C-C_R | 0 | 5.89559800  | 3.13630800 | -2.42704200 | L |
| C-C_R | 0 | 4.67214400  | 2.50727100 | -2.24017300 | L |
| H-H_  | 0 | 7.42663000  | 2.92017000 | -4.01761200 | L |
| H-H_  | 0 | 3.62784800  | 0.96143100 | -3.45363900 | L |
| C-C_R | 0 | 4.00451900  | 2.53059700 | -1.00372700 | L |
| C-C_R | 0 | 6.54504800  | 3.82547300 | -1.39535200 | L |
| H-H_  | 0 | 7.51156500  | 4.29052500 | -1.53541600 | L |
| C-C_R | 0 | 4.64260900  | 3.25047400 | 0.02212800  | L |
| C-C_3 | 0 | -3.29087900 | 4.83079400 | -2.36735800 | L |
| C-C_3 | 0 | -4.30333700 | 6.79554600 | -1.96238500 | L |
| C-C_R | 0 | -3.89519300 | 6.24172200 | -0.63055700 | L |
| C-C_3 | 0 | -3.14446600 | 6.28236400 | -2.81166900 | L |
| H-H_  | 0 | -3.30543000 | 6.42469000 | -3.90579400 | L |
| H-H_  | 0 | -2.16274900 | 6.72702000 | -2.52157800 | L |
| C-C_3 | 0 | -4.75480900 | 4.55499100 | -2.76828300 | L |
| H-H_  | 0 | -4.81798600 | 4.29750200 | -3.84831700 | L |
| H-H_  | 0 | -5.19740800 | 3.73139700 | -2.16597100 | L |
| C-C_3 | 0 | -5.45501300 | 5.91161600 | -2.48690900 | L |
| H-H_  | 0 | -5.87421800 | 6.33819500 | -3.42452900 | L |

|       |   |             |             |             |   |
|-------|---|-------------|-------------|-------------|---|
| H-H_  | 0 | -6.26632500 | 5.80561300  | -1.73308300 | L |
| H-H_  | 0 | -2.53767900 | 4.12129500  | -2.77093000 | L |
| H-H_  | 0 | -4.48200100 | 7.89124400  | -1.99261100 | L |
| C-C_3 | 0 | -1.77238900 | 6.58730200  | 3.45018400  | L |
| C-C_3 | 0 | -3.25896900 | 6.29498400  | 3.15135400  | L |
| C-C_3 | 0 | -2.26291400 | 4.31853400  | 2.75973800  | L |
| C-C_3 | 0 | -1.08521800 | 5.22124700  | 3.18141100  | L |
| H-H_  | 0 | -1.37046100 | 7.38538000  | 2.78744500  | L |
| H-H_  | 0 | -1.64302400 | 6.88851500  | 4.51288000  | L |
| H-H_  | 0 | -0.31852800 | 5.29733300  | 2.37912000  | L |
| H-H_  | 0 | -0.61116900 | 4.83038200  | 4.10841500  | L |
| C-C_3 | 0 | -3.36978800 | 4.86032000  | 3.65820500  | L |
| H-H_  | 0 | -4.36406200 | 4.40012400  | 3.44577300  | L |
| H-H_  | 0 | -3.14134900 | 4.75959500  | 4.74496000  | L |
| C-C_R | 0 | -3.37035500 | 6.04325700  | 1.67775500  | L |
| C-C_R | 0 | -2.75284600 | 4.82530400  | 1.43469400  | L |
| H-H_  | 0 | -3.98948500 | 7.01815500  | 3.57166500  | L |
| H-H_  | 0 | -2.08232100 | 3.22447300  | 2.82061900  | L |
| C-C_R | 0 | -2.67067400 | 4.27870100  | 0.14523100  | L |
| C-C_R | 0 | -3.95787400 | 6.79827100  | 0.65418900  | L |
| H-H_  | 0 | -4.42021500 | 7.75792600  | 0.84211100  | L |
| C-C_R | 0 | -3.27157600 | 5.02651700  | -0.87933800 | L |
| C-C_R | 0 | 2.49753200  | -1.12995400 | 5.70032600  | H |
| C-C_R | 0 | 1.86410600  | -0.23554800 | 4.84833400  | H |
| C-C_R | 0 | 2.36336800  | 0.00357800  | 3.55839900  | H |
| C-C_R | 0 | 3.51231900  | -0.69676600 | 3.15260600  | H |
| C-C_R | 0 | 4.15311300  | -1.57737800 | 4.00973600  | H |
| C-C_R | 0 | 3.64684800  | -1.80113100 | 5.28867800  | H |
| H-H_  | 0 | 2.09460900  | -1.30279600 | 6.69725300  | H |
| H-H_  | 0 | 0.96889200  | 0.28694000  | 5.18331800  | H |
| H-H_  | 0 | 3.89774900  | -0.53211900 | 2.14470400  | H |
| H-H_  | 0 | 5.05335200  | -2.09430100 | 3.68070800  | H |
| H-H_  | 0 | 4.14500700  | -2.49764900 | 5.96109600  | H |
| C-C_3 | 0 | 1.72299300  | 0.93000200  | 2.62402200  | H |
| C-C_3 | 0 | 0.89767100  | 2.07962000  | 3.14041600  | H |
| H-H_  | 0 | 0.84292100  | 0.25227700  | 1.97595500  | H |
| H-H_  | 0 | 2.38688100  | 1.20099000  | 1.79421900  | H |
| H-H_  | 0 | 1.49053500  | 2.74759200  | 3.78393900  | H |

|      |   |            |            |            |   |
|------|---|------------|------------|------------|---|
| H-H_ | 0 | 0.50625100 | 2.66885600 | 2.30098400 | H |
| H-H_ | 0 | 0.03366700 | 1.73325600 | 3.72314700 | H |

**S\_1INT (OSS)**

|          |   |             |             |             |   |
|----------|---|-------------|-------------|-------------|---|
| C-C_R    | 0 | 1.78322300  | 2.38118600  | -0.67395500 | H |
| C-C_R    | 0 | 1.82727200  | 3.82034200  | -0.70503800 | H |
| C-C_R    | 0 | 0.57062200  | 4.27635400  | -0.48327600 | H |
| C-C_R    | 0 | -0.29178600 | 3.13112900  | -0.34813400 | H |
| N-N_R    | 0 | 0.47371400  | 2.00013300  | -0.47609900 | H |
| C-C_R    | 0 | 2.88822000  | 1.52981000  | -0.77582800 | H |
| C-C_R    | 0 | -1.67468500 | 3.17941100  | -0.13677000 | H |
| C-C_R    | 0 | -2.53931700 | 2.07850100  | -0.14405000 | H |
| C-C_R    | 0 | -3.97225600 | 2.13523100  | 0.02848600  | H |
| C-C_R    | 0 | -4.44191200 | 0.87146600  | -0.07907700 | H |
| C-C_R    | 0 | -3.30698800 | 0.00166500  | -0.29240300 | H |
| N-N_R    | 0 | -2.17907700 | 0.77771400  | -0.34043600 | H |
| C-C_R    | 0 | -3.36950400 | -1.39189500 | -0.39072200 | H |
| C-C_R    | 0 | -2.26867600 | -2.26028900 | -0.46185400 | H |
| C-C_R    | 0 | -2.33432800 | -3.70644100 | -0.46570000 | H |
| C-C_R    | 0 | -1.06173800 | -4.16311900 | -0.42846200 | H |
| C-C_R    | 0 | -0.18889300 | -3.00661600 | -0.41699800 | H |
| N-N_R    | 0 | -0.96482000 | -1.89096300 | -0.46058800 | H |
| C-C_R    | 0 | 1.21204200  | -3.04457300 | -0.35521100 | H |
| C-C_R    | 0 | 2.07691400  | -1.94139500 | -0.41715400 | H |
| C-C_R    | 0 | 3.51815200  | -2.01447000 | -0.46427400 | H |
| C-C_R    | 0 | 3.98542000  | -0.75198600 | -0.62370700 | H |
| C-C_R    | 0 | 2.84173000  | 0.12899500  | -0.65383600 | H |
| N-N_R    | 0 | 1.71556600  | -0.62480600 | -0.50758200 | H |
| H-H_     | 0 | 2.71479800  | 4.42358200  | -0.86527200 | H |
| H-H_     | 0 | 0.25520600  | 5.31372500  | -0.43500300 | H |
| H-H_     | 0 | -4.55278600 | 3.03502000  | 0.20446600  | H |
| H-H_     | 0 | -5.47659200 | 0.55269100  | -0.00323600 | H |
| H-H_     | 0 | -3.24238300 | -4.30064400 | -0.48017900 | H |
| H-H_     | 0 | -0.74134500 | -5.20006300 | -0.41394600 | H |
| H-H_     | 0 | 4.10859900  | -2.92264500 | -0.39676700 | H |
| H-H_     | 0 | 5.02398800  | -0.44691000 | -0.70406800 | H |
| Ru-Ru6+2 | 0 | -0.24776200 | 0.08885000  | -0.52579800 | H |

|       |   |             |             |             |   |
|-------|---|-------------|-------------|-------------|---|
| O-O_3 | 0 | -0.27592300 | -0.14465800 | -2.25348700 | H |
| O-O_3 | 0 | -0.25836900 | -0.17987300 | 1.40170100  | H |
| C-C_3 | 0 | 2.09478700  | -4.88767700 | -2.79647700 | L |
| C-C_3 | 0 | 2.93620600  | -6.95929400 | -2.57491400 | L |
| C-C_R | 0 | 2.74670100  | -6.42362400 | -1.18781100 | L |
| C-C_3 | 0 | 1.74619100  | -6.29724700 | -3.26264400 | L |
| H-H_  | 0 | 1.76233900  | -6.40908200 | -4.37191200 | L |
| H-H_  | 0 | 0.76399700  | -6.65272100 | -2.86947500 | L |
| C-C_3 | 0 | 3.52262000  | -4.74365200 | -3.36259600 | L |
| H-H_  | 0 | 3.48577700  | -4.44884200 | -4.43426700 | L |
| H-H_  | 0 | 4.11641100  | -3.99452600 | -2.79407900 | L |
| C-C_3 | 0 | 4.10499700  | -6.17430200 | -3.20786200 | L |
| H-H_  | 0 | 4.36500700  | -6.60120900 | -4.20131200 | L |
| H-H_  | 0 | 5.00531200  | -6.18191500 | -2.55432200 | L |
| H-H_  | 0 | 1.37818300  | -4.08978000 | -3.08522100 | L |
| H-H_  | 0 | 2.99444900  | -8.06517100 | -2.65888400 | L |
| C-C_3 | 0 | 1.08670600  | -6.72073700 | 3.10874600  | L |
| C-C_3 | 0 | 2.55020000  | -6.57544300 | 2.63875700  | L |
| C-C_3 | 0 | 1.73914000  | -4.48896700 | 2.43169700  | L |
| C-C_3 | 0 | 0.52842700  | -5.27878700 | 2.96932300  | L |
| H-H_  | 0 | 0.52288200  | -7.44129500 | 2.47582500  | L |
| H-H_  | 0 | 1.05194300  | -7.05343200 | 4.16937200  | L |
| H-H_  | 0 | -0.33356400 | -5.23778000 | 2.26799300  | L |
| H-H_  | 0 | 0.21712600  | -4.88078100 | 3.96006500  | L |
| C-C_3 | 0 | 2.87854800  | -5.18484200 | 3.17028600  | L |
| H-H_  | 0 | 3.88587500  | -4.82982400 | 2.84869500  | L |
| H-H_  | 0 | 2.79547700  | -5.10677300 | 4.27948400  | L |
| C-C_R | 0 | 2.51442400  | -6.27236400 | 1.17119300  | L |
| C-C_R | 0 | 2.00907500  | -4.98679900 | 1.04155600  | L |
| H-H_  | 0 | 3.24089300  | -7.38956100 | 2.94450600  | L |
| H-H_  | 0 | 1.68622000  | -3.38562100 | 2.54715200  | L |
| C-C_R | 0 | 1.83354000  | -4.38128300 | -0.21241600 | L |
| C-C_R | 0 | 2.89650600  | -7.03851700 | 0.06237600  | L |
| H-H_  | 0 | 3.27245000  | -8.04762500 | 0.16438600  | L |
| C-C_R | 0 | 2.22934400  | -5.14249700 | -1.32335300 | L |
| C-C_3 | 0 | -5.23686100 | -1.83405900 | -2.93061400 | L |
| C-C_3 | 0 | -7.25587200 | -2.81951900 | -2.85902400 | L |
| C-C_R | 0 | -6.73388600 | -2.80880300 | -1.45400300 | L |

|       |   |             |             |             |   |
|-------|---|-------------|-------------|-------------|---|
| C-C_3 | 0 | -6.66399200 | -1.50373500 | -3.35517500 | L |
| H-H_  | 0 | -6.77222200 | -1.36092500 | -4.45571000 | L |
| H-H_  | 0 | -7.07832400 | -0.61353800 | -2.82464300 | L |
| C-C_3 | 0 | -5.00632600 | -3.15118600 | -3.69988400 | L |
| H-H_  | 0 | -4.70951400 | -2.93898500 | -4.75040500 | L |
| H-H_  | 0 | -4.22559000 | -3.77755200 | -3.21376700 | L |
| C-C_3 | 0 | -6.40089600 | -3.83216400 | -3.65113500 | L |
| H-H_  | 0 | -6.80874000 | -3.96401000 | -4.67733700 | L |
| H-H_  | 0 | -6.35709000 | -4.81956200 | -3.14039000 | L |
| H-H_  | 0 | -4.48312300 | -1.03602300 | -3.09975600 | L |
| H-H_  | 0 | -8.35622100 | -2.92870700 | -2.96189900 | L |
| C-C_3 | 0 | -6.97178900 | -2.17556100 | 3.13739400  | L |
| C-C_3 | 0 | -6.76778000 | -3.47055200 | 2.32201500  | L |
| C-C_3 | 0 | -4.73962000 | -2.50479000 | 2.25744800  | L |
| C-C_3 | 0 | -5.57037700 | -1.50886000 | 3.09256200  | L |
| H-H_  | 0 | -7.75052600 | -1.52362400 | 2.68325000  | L |
| H-H_  | 0 | -7.25692600 | -2.41838000 | 4.18457700  | L |
| H-H_  | 0 | -5.60758400 | -0.50489900 | 2.61448200  | L |
| H-H_  | 0 | -5.14720400 | -1.41539500 | 4.11674500  | L |
| C-C_3 | 0 | -5.33859000 | -3.82969200 | 2.71743200  | L |
| H-H_  | 0 | -4.93807700 | -4.70497300 | 2.15255700  | L |
| H-H_  | 0 | -5.21765500 | -4.00946800 | 3.81120400  | L |
| C-C_R | 0 | -6.53333900 | -3.06128400 | 0.89908300  | L |
| C-C_R | 0 | -5.28177700 | -2.46321000 | 0.85840800  | L |
| H-H_  | 0 | -7.52985400 | -4.26385700 | 2.47444700  | L |
| H-H_  | 0 | -3.63681700 | -2.41230500 | 2.35206900  | L |
| C-C_R | 0 | -4.71228300 | -2.01428000 | -0.34340300 | L |
| C-C_R | 0 | -7.30141900 | -3.26173800 | -0.25564200 | L |
| H-H_  | 0 | -8.27005600 | -3.74212400 | -0.22467100 | L |
| C-C_R | 0 | -5.48666500 | -2.20217800 | -1.49768900 | L |
| C-C_3 | 0 | 4.57606700  | 3.16834300  | 1.40718300  | L |
| C-C_3 | 0 | 6.64797900  | 3.96026000  | 1.05706800  | L |
| C-C_R | 0 | 6.20912600  | 3.32082200  | -0.22553900 | L |
| C-C_3 | 0 | 5.30623100  | 4.50059300  | 1.53568700  | L |
| H-H_  | 0 | 5.33530000  | 4.88543400  | 2.58184500  | L |
| H-H_  | 0 | 4.89001400  | 5.28854300  | 0.86386200  | L |
| C-C_3 | 0 | 5.44387000  | 2.27573900  | 2.31749700  | L |
| H-H_  | 0 | 5.14612500  | 2.40097200  | 3.38167800  | L |

|       |   |             |            |             |   |
|-------|---|-------------|------------|-------------|---|
| H-H_  | 0 | 5.36416700  | 1.20348200 | 2.03393600  | L |
| C-C_3 | 0 | 6.87616600  | 2.82330200 | 2.07662600  | L |
| H-H_  | 0 | 7.30410200  | 3.22870900 | 3.01966500  | L |
| H-H_  | 0 | 7.55202100  | 2.03842800 | 1.67057100  | L |
| H-H_  | 0 | 3.49411100  | 3.20427300 | 1.64521000  | L |
| H-H_  | 0 | 7.46855600  | 4.70321400 | 0.96765500  | L |
| C-C_3 | 0 | 5.66366600  | 3.00448900 | -4.82291000 | L |
| C-C_3 | 0 | 6.53628000  | 2.16753200 | -3.86378100 | L |
| C-C_3 | 0 | 4.47610500  | 1.33708900 | -3.52858500 | L |
| C-C_3 | 0 | 4.24000700  | 2.43132700 | -4.59011400 | L |
| H-H_  | 0 | 5.71364700  | 4.08935000 | -4.58136300 | L |
| H-H_  | 0 | 5.98335900  | 2.84466300 | -5.87604000 | L |
| H-H_  | 0 | 3.53748900  | 3.21219900 | -4.22295600 | L |
| H-H_  | 0 | 3.83959000  | 1.98313000 | -5.52581900 | L |
| C-C_3 | 0 | 5.84163200  | 0.81299100 | -3.95948500 | L |
| H-H_  | 0 | 6.25932300  | 0.05906800 | -3.25048700 | L |
| H-H_  | 0 | 5.84363100  | 0.39049400 | -4.99133600 | L |
| C-C_R | 0 | 6.14239100  | 2.54764200 | -2.46849300 | L |
| C-C_R | 0 | 4.86935200  | 2.03541000 | -2.25797700 | L |
| H-H_  | 0 | 7.62694600  | 2.17204400 | -4.07316300 | L |
| H-H_  | 0 | 3.67301300  | 0.57580700 | -3.43774600 | L |
| C-C_R | 0 | 4.21804100  | 2.14460100 | -1.01714700 | L |
| C-C_R | 0 | 6.86127300  | 3.19770100 | -1.45821100 | L |
| H-H_  | 0 | 7.86213700  | 3.57555500 | -1.61811100 | L |
| C-C_R | 0 | 4.93016400  | 2.82435400 | -0.01172400 | L |
| C-C_3 | 0 | -2.85617200 | 5.12630400 | -2.36676700 | L |
| C-C_3 | 0 | -3.68072000 | 7.17361300 | -1.94491000 | L |
| C-C_R | 0 | -3.31335300 | 6.57851900 | -0.61906800 | L |
| C-C_3 | 0 | -2.58124100 | 6.56041900 | -2.80674600 | L |
| H-H_  | 0 | -2.73802300 | 6.72202500 | -3.89879300 | L |
| H-H_  | 0 | -1.56039200 | 6.91190500 | -2.52391300 | L |
| C-C_3 | 0 | -4.34267200 | 4.98751900 | -2.75505500 | L |
| H-H_  | 0 | -4.43879100 | 4.74169000 | -3.83537100 | L |
| H-H_  | 0 | -4.85333900 | 4.20521700 | -2.15149000 | L |
| C-C_3 | 0 | -4.91309100 | 6.40131300 | -2.46222300 | L |
| H-H_  | 0 | -5.29957900 | 6.86880200 | -3.39436700 | L |
| H-H_  | 0 | -5.72405100 | 6.36665500 | -1.70140400 | L |
| H-H_  | 0 | -2.17467300 | 4.35269000 | -2.77987200 | L |

|       |   |             |             |             |   |
|-------|---|-------------|-------------|-------------|---|
| H-H_  | 0 | -3.75844600 | 8.28120100  | -1.96923300 | L |
| C-C_3 | 0 | -1.13438600 | 6.71081100  | 3.44496400  | L |
| C-C_3 | 0 | -2.64342400 | 6.55502000  | 3.15717300  | L |
| C-C_3 | 0 | -1.83274800 | 4.49881700  | 2.74856000  | L |
| C-C_3 | 0 | -0.57538400 | 5.28975500  | 3.16493200  | L |
| H-H_  | 0 | -0.66727000 | 7.47263900  | 2.78230900  | L |
| H-H_  | 0 | -0.97016500 | 6.99399600  | 4.50781700  | L |
| H-H_  | 0 | 0.18942100  | 5.30010200  | 2.35737000  | L |
| H-H_  | 0 | -0.13225700 | 4.85377200  | 4.08700900  | L |
| C-C_3 | 0 | -2.87922800 | 5.13348200  | 3.65855100  | L |
| H-H_  | 0 | -3.91257300 | 4.76589500  | 3.45227400  | L |
| H-H_  | 0 | -2.65235900 | 5.00699000  | 4.74293900  | L |
| C-C_R | 0 | -2.78837200 | 6.32206600  | 1.68344000  | L |
| C-C_R | 0 | -2.28573900 | 5.05445800  | 1.42978600  | L |
| H-H_  | 0 | -3.30249500 | 7.33888700  | 3.58667200  | L |
| H-H_  | 0 | -1.75009100 | 3.39264800  | 2.80317700  | L |
| C-C_R | 0 | -2.26709200 | 4.50798200  | 0.13759500  | L |
| C-C_R | 0 | -3.31395100 | 7.13220600  | 0.66839300  | L |
| H-H_  | 0 | -3.68565400 | 8.12890100  | 0.86446700  | L |
| C-C_R | 0 | -2.80599400 | 5.31245900  | -0.87831900 | L |
| C-C_R | 0 | 2.52623300  | -1.30674500 | 5.75566100  | H |
| C-C_R | 0 | 2.04868200  | -0.28658800 | 4.95218600  | H |
| C-C_R | 0 | 2.55151100  | -0.09966700 | 3.63899800  | H |
| C-C_R | 0 | 3.55046800  | -1.00090100 | 3.18477000  | H |
| C-C_R | 0 | 4.03253400  | -2.00393600 | 4.00240700  | H |
| C-C_R | 0 | 3.52323600  | -2.16948600 | 5.29382100  | H |
| H-H_  | 0 | 2.12304600  | -1.43430300 | 6.75950500  | H |
| H-H_  | 0 | 1.27605900  | 0.38415400  | 5.32636500  | H |
| H-H_  | 0 | 3.93491900  | -0.88215800 | 2.16984900  | H |
| H-H_  | 0 | 4.81358700  | -2.66882500 | 3.63636600  | H |
| H-H_  | 0 | 3.89906900  | -2.96619600 | 5.93338100  | H |
| C-C_R | 0 | 2.10517100  | 0.93824800  | 2.79252800  | H |
| C-C_3 | 0 | 1.11158900  | 1.98029600  | 3.16590400  | H |
| H-H_  | 0 | 0.63627400  | -0.35477000 | 1.75055900  | H |
| H-H_  | 0 | 2.57355700  | 0.99937300  | 1.80839300  | H |
| H-H_  | 0 | 1.49521100  | 2.64790800  | 3.95546300  | H |
| H-H_  | 0 | 0.85286400  | 2.59926700  | 2.29850200  | H |
| H-H_  | 0 | 0.17413700  | 1.54106600  | 3.53813900  | H |

## R\_1TS2 (OSS)

|       |   |             |             |             |   |
|-------|---|-------------|-------------|-------------|---|
| C-C_R | 0 | -1.29649600 | 2.88337600  | -0.16730200 | H |
| C-C_R | 0 | -0.95770700 | 4.28863800  | -0.14407900 | H |
| C-C_R | 0 | 0.39194400  | 4.37389900  | -0.14982400 | H |
| C-C_R | 0 | 0.91075400  | 3.02323600  | -0.19367700 | H |
| N-N_R | 0 | -0.14611400 | 2.16215700  | -0.21071500 | H |
| H-H_  | 0 | -1.66488600 | 5.11128500  | -0.11949000 | H |
| H-H_  | 0 | 0.98721800  | 5.28119500  | -0.12797900 | H |
| C-C_R | 0 | 2.26965900  | 2.68262500  | -0.22144100 | H |
| C-C_R | 0 | 4.20492100  | 1.06068000  | -0.37069800 | H |
| C-C_R | 0 | 4.30511800  | -0.28694800 | -0.43785600 | H |
| C-C_R | 0 | 2.96292300  | -0.82058800 | -0.36923200 | H |
| N-N_R | 0 | 2.09307700  | 0.21996900  | -0.26854200 | H |
| C-C_R | 0 | 2.79902500  | 1.38507000  | -0.27414200 | H |
| H-H_  | 0 | 5.02106500  | 1.77584100  | -0.39390800 | H |
| H-H_  | 0 | 5.21769500  | -0.86754500 | -0.52409500 | H |
| C-C_R | 0 | -2.59600100 | 2.35785400  | -0.12628700 | H |
| N-N_R | 0 | -2.04347700 | -0.05728000 | -0.16957100 | H |
| C-C_R | 0 | -2.76625600 | -1.22237400 | -0.16322600 | H |
| C-C_R | 0 | -4.16455900 | -0.88505400 | -0.06790300 | H |
| C-C_R | 0 | -4.25811100 | 0.46585400  | -0.02694000 | H |
| C-C_R | 0 | -2.92173300 | 0.99845100  | -0.10491600 | H |
| H-H_  | 0 | -4.98512800 | -1.59438700 | -0.02966500 | H |
| H-H_  | 0 | -5.16836100 | 1.05187700  | 0.05070800  | H |
| C-C_R | 0 | -2.25308500 | -2.52563500 | -0.22222300 | H |
| N-N_R | 0 | 0.15538100  | -1.98070700 | -0.23220100 | H |
| C-C_R | 0 | 1.32339600  | -2.70011100 | -0.30569200 | H |
| C-C_R | 0 | 0.98882400  | -4.10352900 | -0.31106100 | H |
| C-C_R | 0 | -0.36179900 | -4.20250000 | -0.27137400 | H |
| C-C_R | 0 | -0.89259300 | -2.86145600 | -0.23485400 | H |
| H-H_  | 0 | 1.70182400  | -4.92124000 | -0.34399400 | H |
| H-H_  | 0 | -0.94993900 | -5.11460100 | -0.26706300 | H |
| C-C_R | 0 | 2.62137500  | -2.18291100 | -0.39114000 | H |
| O-O_3 | 0 | 0.18843700  | 0.26175800  | 1.62957600  | H |
| H-H_  | 0 | 0.81802600  | -0.39243800 | 1.98007100  | H |
| C-C_3 | 0 | -1.63697600 | -1.08451700 | 3.20246000  | H |
| H-H_  | 0 | -1.91847600 | -1.58703100 | 2.27764100  | H |



|          |   |             |             |             |   |
|----------|---|-------------|-------------|-------------|---|
| C-C_R    | 0 | -0.53221300 | -1.60795600 | 3.90920200  | H |
| C-C_R    | 0 | 0.17682700  | -2.72308600 | 3.39161900  | H |
| C-C_R    | 0 | 1.26176200  | -3.25519800 | 4.06105200  | H |
| C-C_R    | 0 | 1.70283100  | -2.68956000 | 5.26066300  | H |
| C-C_R    | 0 | 1.03446900  | -1.57711100 | 5.77748500  | H |
| C-C_R    | 0 | -0.06116100 | -1.04276100 | 5.12080700  | H |
| H-H_     | 0 | -0.14523800 | -3.15688500 | 2.44314600  | H |
| H-H_     | 0 | 1.76390600  | -4.12760600 | 3.64942100  | H |
| H-H_     | 0 | 2.56007800  | -3.10931400 | 5.78410200  | H |
| H-H_     | 0 | 1.37723300  | -1.12362600 | 6.70689300  | H |
| H-H_     | 0 | -0.56972100 | -0.17296100 | 5.53510200  | H |
| C-C_3    | 0 | -2.39758200 | 0.12763300  | 3.59363300  | H |
| H-H_     | 0 | -1.76572600 | 1.02531200  | 3.49212800  | H |
| H-H_     | 0 | -3.27400900 | 0.26457400  | 2.94865200  | H |
| H-H_     | 0 | -2.74849900 | 0.09123000  | 4.63688200  | H |
| O-O_3    | 0 | 0.15099300  | 0.19908100  | -2.03704800 | H |
| Ru-Ru6+2 | 0 | -0.00623100 | 0.08221700  | -0.30358300 | H |
| C-C_3    | 0 | -4.08829800 | 3.32044400  | -2.76475500 | L |
| C-C_3    | 0 | -5.82578800 | 4.74594800  | -2.78857400 | L |
| C-C_R    | 0 | -5.43500400 | 4.56996100  | -1.35223000 | L |
| C-C_3    | 0 | -4.44814100 | 4.64195900  | -3.43592600 | L |
| H-H_     | 0 | -4.48980600 | 4.57233600  | -4.54802200 | L |
| H-H_     | 0 | -3.76660500 | 5.47594500  | -3.14348400 | L |
| C-C_3    | 0 | -5.25824600 | 2.43271000  | -3.23768700 | L |
| H-H_     | 0 | -5.05874200 | 2.04234800  | -4.25973300 | L |
| H-H_     | 0 | -5.43385300 | 1.58028200  | -2.54556000 | L |
| C-C_3    | 0 | -6.45906900 | 3.41646000  | -3.25187700 | L |
| H-H_     | 0 | -6.86841500 | 3.52041200  | -4.28068400 | L |
| H-H_     | 0 | -7.26781500 | 3.08583200  | -2.56314500 | L |
| H-H_     | 0 | -3.06971400 | 2.93075300  | -2.97510900 | L |
| H-H_     | 0 | -6.40484800 | 5.66498800  | -3.01963400 | L |
| C-C_3    | 0 | -4.43993000 | 6.01471400  | 2.95244900  | L |
| C-C_3    | 0 | -5.59821100 | 5.13596400  | 2.43445800  | L |
| C-C_3    | 0 | -3.86066300 | 3.71294800  | 2.47203300  | L |
| C-C_3    | 0 | -3.24004400 | 5.03064000  | 2.98027300  | L |
| H-H_     | 0 | -4.24672100 | 6.87780800  | 2.27757000  | L |
| H-H_     | 0 | -4.66470500 | 6.38779500  | 3.97573400  | L |
| H-H_     | 0 | -2.41099800 | 5.37498100  | 2.32427300  | L |

|       |   |             |            |             |   |
|-------|---|-------------|------------|-------------|---|
| H-H_  | 0 | -2.86056400 | 4.90386400 | 4.01793500  | L |
| C-C_3 | 0 | -5.25315000 | 3.80057400 | 3.08694500  | L |
| H-H_  | 0 | -5.92376400 | 2.97047400 | 2.76009900  | L |
| H-H_  | 0 | -5.23869600 | 3.84663500 | 4.20092600  | L |
| C-C_R | 0 | -5.28927500 | 4.79808200 | 1.00706600  | L |
| C-C_R | 0 | -4.21588000 | 3.91797800 | 1.02870200  | L |
| H-H_  | 0 | -6.62176700 | 5.52200000 | 2.62596500  | L |
| H-H_  | 0 | -3.28620200 | 2.79312700 | 2.69895600  | L |
| C-C_R | 0 | -3.71874700 | 3.32492500 | -0.14300700 | L |
| C-C_R | 0 | -5.93929000 | 5.15244600 | -0.18237600 | L |
| H-H_  | 0 | -6.78233700 | 5.83002300 | -0.19595900 | L |
| C-C_R | 0 | -4.36345800 | 3.68873500 | -1.33571900 | L |
| C-C_3 | 0 | 3.50739900  | 3.89346700 | 2.44685000  | L |
| C-C_3 | 0 | 5.01450600  | 5.56022500 | 2.49983400  | L |
| C-C_R | 0 | 4.70585700  | 5.30715600 | 1.05496600  | L |
| C-C_3 | 0 | 3.64489000  | 5.26336900 | 3.10313700  | L |
| H-H_  | 0 | 3.65659300  | 5.21693200 | 4.21714800  | L |
| H-H_  | 0 | 2.85890600  | 5.98305600 | 2.77172100  | L |
| C-C_3 | 0 | 4.77752600  | 3.19469000 | 2.97442500  | L |
| H-H_  | 0 | 4.60159800  | 2.79242700 | 3.99618500  | L |
| H-H_  | 0 | 5.10024700  | 2.36875600 | 2.30274200  | L |
| C-C_3 | 0 | 5.81922700  | 4.34543800 | 3.01026700  | L |
| H-H_  | 0 | 6.17094800  | 4.52339500 | 4.05019200  | L |
| H-H_  | 0 | 6.69246900  | 4.12816700 | 2.35607800  | L |
| H-H_  | 0 | 2.55019300  | 3.36079900 | 2.63065000  | L |
| H-H_  | 0 | 5.44358400  | 6.55793000 | 2.73177700  | L |
| C-C_3 | 0 | 3.65444200  | 6.50996400 | -3.30555800 | L |
| C-C_3 | 0 | 4.91827700  | 5.83000300 | -2.73670300 | L |
| C-C_3 | 0 | 3.42432400  | 4.15225500 | -2.80106200 | L |
| C-C_3 | 0 | 2.62307200  | 5.35042900 | -3.35080500 | L |
| H-H_  | 0 | 3.30766900  | 7.34172600 | -2.65314800 | L |
| H-H_  | 0 | 3.85153100  | 6.89931800 | -4.32849000 | L |
| H-H_  | 0 | 1.73066600  | 5.56937700 | -2.72385900 | L |
| H-H_  | 0 | 2.30040900  | 5.15284600 | -4.39655500 | L |
| C-C_3 | 0 | 4.80610600  | 4.44858500 | -3.37462600 | L |
| H-H_  | 0 | 5.58671400  | 3.73791900 | -3.01238200 | L |
| H-H_  | 0 | 4.82155200  | 4.47719600 | -4.48917700 | L |
| C-C_R | 0 | 4.61943800  | 5.46757300 | -1.31323600 | L |

|       |   |            |             |             |   |
|-------|---|------------|-------------|-------------|---|
| C-C_R | 0 | 3.69521300 | 4.43286400  | -1.35186800 | L |
| H-H_  | 0 | 5.87497700 | 6.36841300  | -2.90461200 | L |
| H-H_  | 0 | 3.00925600 | 3.14756400  | -3.02899300 | L |
| C-C_R | 0 | 3.24228600 | 3.79899300  | -0.18462800 | L |
| C-C_R | 0 | 5.16162800 | 5.93844300  | -0.10991000 | L |
| H-H_  | 0 | 5.89105200 | 6.73668400  | -0.08234800 | L |
| C-C_R | 0 | 3.77723300 | 4.27689900  | 1.02120800  | L |
| C-C_3 | 0 | 4.67253500 | -3.18446700 | 1.84528400  | L |
| C-C_3 | 0 | 6.51411200 | -4.39164100 | 1.40166700  | L |
| C-C_R | 0 | 5.73269300 | -4.31505900 | 0.12425700  | L |
| C-C_3 | 0 | 6.18183400 | -3.02089500 | 1.98348200  | L |
| H-H_  | 0 | 6.51425500 | -2.89998900 | 3.04089100  | L |
| H-H_  | 0 | 6.58493300 | -2.17980000 | 1.37093500  | L |
| C-C_3 | 0 | 4.44852100 | -4.47826600 | 2.65719800  | L |
| H-H_  | 0 | 4.37466400 | -4.24800800 | 3.74271800  | L |
| H-H_  | 0 | 3.53355900 | -5.01557000 | 2.32362100  | L |
| C-C_3 | 0 | 5.72509900 | -5.30711800 | 2.35846600  | L |
| H-H_  | 0 | 6.30482500 | -5.48437500 | 3.29090300  | L |
| H-H_  | 0 | 5.47988900 | -6.28288800 | 1.88358300  | L |
| H-H_  | 0 | 4.05831300 | -2.31152600 | 2.15274900  | L |
| H-H_  | 0 | 7.59436200 | -4.62457500 | 1.29101400  | L |
| C-C_3 | 0 | 5.60335700 | -3.14160800 | -4.25963100 | L |
| C-C_3 | 0 | 5.23960700 | -4.52141700 | -3.66970200 | L |
| C-C_3 | 0 | 3.40736300 | -3.29051000 | -3.24901600 | L |
| C-C_3 | 0 | 4.33715600 | -2.29144000 | -3.96863300 | L |
| H-H_  | 0 | 6.50618600 | -2.71216700 | -3.77153500 | L |
| H-H_  | 0 | 5.77791300 | -3.22265600 | -5.35497200 | L |
| H-H_  | 0 | 4.57027200 | -1.41316800 | -3.32675600 | L |
| H-H_  | 0 | 3.87154700 | -1.94329500 | -4.91662600 | L |
| C-C_3 | 0 | 3.74957100 | -4.57858700 | -3.98940300 | L |
| H-H_  | 0 | 3.24614800 | -5.47463600 | -3.55449700 | L |
| H-H_  | 0 | 3.53246600 | -4.52772900 | -5.08195600 | L |
| C-C_R | 0 | 5.16555700 | -4.35700700 | -2.18157700 | L |
| C-C_R | 0 | 4.03472600 | -3.59691800 | -1.91989300 | L |
| H-H_  | 0 | 5.84607500 | -5.37981400 | -4.02831300 | L |
| H-H_  | 0 | 2.33033400 | -3.02052700 | -3.22364100 | L |
| C-C_R | 0 | 3.72671400 | -3.14288300 | -0.62749300 | L |
| C-C_R | 0 | 6.06830000 | -4.71868700 | -1.17436000 | L |

|       |   |             |             |             |   |
|-------|---|-------------|-------------|-------------|---|
| H-H_  | 0 | 6.98522800  | -5.25023700 | -1.39064100 | L |
| C-C_R | 0 | 4.59704000  | -3.56066600 | 0.39386100  | L |
| C-C_3 | 0 | -3.35128700 | -4.32974700 | 2.18794600  | L |
| C-C_3 | 0 | -4.99649300 | -5.84243900 | 1.97122700  | L |
| C-C_R | 0 | -4.71122200 | -5.31701600 | 0.59703600  | L |
| C-C_3 | 0 | -3.58888000 | -5.79111800 | 2.55211400  | L |
| H-H_  | 0 | -3.55970900 | -5.97989700 | 3.65071500  | L |
| H-H_  | 0 | -2.88121800 | -6.48532800 | 2.03942900  | L |
| C-C_3 | 0 | -4.53243600 | -3.65670600 | 2.91495000  | L |
| H-H_  | 0 | -4.28549300 | -3.49674200 | 3.98745900  | L |
| H-H_  | 0 | -4.79935200 | -2.68265800 | 2.44853200  | L |
| C-C_3 | 0 | -5.67195400 | -4.70040500 | 2.76242800  | L |
| H-H_  | 0 | -6.00573200 | -5.06434300 | 3.75887400  | L |
| H-H_  | 0 | -6.54183200 | -4.27914400 | 2.21148200  | L |
| H-H_  | 0 | -2.34460500 | -3.94336000 | 2.43223400  | L |
| H-H_  | 0 | -5.50467700 | -6.82901200 | 2.01260600  | L |
| C-C_3 | 0 | -4.13553800 | -5.40646300 | -4.02983500 | L |
| C-C_3 | 0 | -5.27825800 | -4.83933800 | -3.16077400 | L |
| C-C_3 | 0 | -3.66733100 | -3.28788900 | -2.95497100 | L |
| C-C_3 | 0 | -3.02219200 | -4.33419100 | -3.88673000 | L |
| H-H_  | 0 | -3.79670900 | -6.40083200 | -3.66362000 | L |
| H-H_  | 0 | -4.46184300 | -5.49365900 | -5.08944500 | L |
| H-H_  | 0 | -2.09500200 | -4.76037700 | -3.44296800 | L |
| H-H_  | 0 | -2.78546700 | -3.87989600 | -4.87382400 | L |
| C-C_3 | 0 | -5.11741800 | -3.34528400 | -3.42246800 | L |
| H-H_  | 0 | -5.79823300 | -2.71855300 | -2.79846200 | L |
| H-H_  | 0 | -5.24329800 | -3.07144200 | -4.49595600 | L |
| C-C_R | 0 | -4.81380400 | -4.89084400 | -1.73635500 | L |
| C-C_R | 0 | -3.81650800 | -3.93381000 | -1.60739600 | L |
| H-H_  | 0 | -6.28726100 | -5.26181300 | -3.35270100 | L |
| H-H_  | 0 | -3.19636800 | -2.28215600 | -2.96208600 | L |
| C-C_R | 0 | -3.23420200 | -3.62833100 | -0.36622500 | L |
| C-C_R | 0 | -5.31071200 | -5.60084000 | -0.63628100 | L |
| H-H_  | 0 | -6.12190100 | -6.31023100 | -0.73002700 | L |
| C-C_R | 0 | -3.69931900 | -4.37571000 | 0.72892700  | L |

**S\_1TS2 (OSS)**

|       |   |             |            |             |   |
|-------|---|-------------|------------|-------------|---|
| C-C_R | 0 | -1.29649600 | 2.88337600 | -0.16730200 | H |
|-------|---|-------------|------------|-------------|---|

|       |   |             |             |             |   |
|-------|---|-------------|-------------|-------------|---|
| C-C_R | 0 | -0.95770700 | 4.28863800  | -0.14407900 | H |
| C-C_R | 0 | 0.39194400  | 4.37389900  | -0.14982400 | H |
| C-C_R | 0 | 0.91075400  | 3.02323600  | -0.19367700 | H |
| N-N_R | 0 | -0.14611400 | 2.16215700  | -0.21071500 | H |
| H-H_  | 0 | -1.66488600 | 5.11128500  | -0.11949000 | H |
| H-H_  | 0 | 0.98721800  | 5.28119500  | -0.12797900 | H |
| C-C_R | 0 | 2.26965900  | 2.68262500  | -0.22144100 | H |
| C-C_R | 0 | 4.20492100  | 1.06068000  | -0.37069800 | H |
| C-C_R | 0 | 4.30511800  | -0.28694800 | -0.43785600 | H |
| C-C_R | 0 | 2.96292300  | -0.82058800 | -0.36923200 | H |
| N-N_R | 0 | 2.09307700  | 0.21996900  | -0.26854200 | H |
| C-C_R | 0 | 2.79902500  | 1.38507000  | -0.27414200 | H |
| H-H_  | 0 | 5.02106500  | 1.77584100  | -0.39390800 | H |
| H-H_  | 0 | 5.21769500  | -0.86754500 | -0.52409500 | H |
| C-C_R | 0 | -2.59600100 | 2.35785400  | -0.12628700 | H |
| N-N_R | 0 | -2.04347700 | -0.05728000 | -0.16957100 | H |
| C-C_R | 0 | -2.76625600 | -1.22237400 | -0.16322600 | H |
| C-C_R | 0 | -4.16455900 | -0.88505400 | -0.06790300 | H |
| C-C_R | 0 | -4.25811100 | 0.46585400  | -0.02694000 | H |
| C-C_R | 0 | -2.92173300 | 0.99845100  | -0.10491600 | H |
| H-H_  | 0 | -4.98512800 | -1.59438700 | -0.02966500 | H |
| H-H_  | 0 | -5.16836100 | 1.05187700  | 0.05070800  | H |
| C-C_R | 0 | -2.25308500 | -2.52563500 | -0.22222300 | H |
| N-N_R | 0 | 0.15538100  | -1.98070700 | -0.23220100 | H |
| C-C_R | 0 | 1.32339600  | -2.70011100 | -0.30569200 | H |
| C-C_R | 0 | 0.98882400  | -4.10352900 | -0.31106100 | H |
| C-C_R | 0 | -0.36179900 | -4.20250000 | -0.27137400 | H |
| C-C_R | 0 | -0.89259300 | -2.86145600 | -0.23485400 | H |
| H-H_  | 0 | 1.70182400  | -4.92124000 | -0.34399400 | H |
| H-H_  | 0 | -0.94993900 | -5.11460100 | -0.26706300 | H |
| C-C_R | 0 | 2.62137500  | -2.18291100 | -0.39114000 | H |
| O-O_3 | 0 | 0.18843700  | 0.26175800  | 1.62957600  | H |
| H-H_  | 0 | 0.81802600  | -0.39243800 | 1.98007100  | H |
| C-C_3 | 0 | -1.63697600 | -1.08451700 | 3.20246000  | H |
| H-H_  | 0 | -1.91847600 | -1.58703100 | 2.27764100  | H |
| C-C_R | 0 | -0.53221300 | -1.60795600 | 3.90920200  | H |
| C-C_R | 0 | 0.17682700  | -2.72308600 | 3.39161900  | H |
| C-C_R | 0 | 1.26176200  | -3.25519800 | 4.06105200  | H |

|          |   |             |             |             |   |
|----------|---|-------------|-------------|-------------|---|
| C-C_R    | 0 | 1.70283100  | -2.68956000 | 5.26066300  | H |
| C-C_R    | 0 | 1.03446900  | -1.57711100 | 5.77748500  | H |
| C-C_R    | 0 | -0.06116100 | -1.04276100 | 5.12080700  | H |
| H-H_     | 0 | -0.14523800 | -3.15688500 | 2.44314600  | H |
| H-H_     | 0 | 1.76390600  | -4.12760600 | 3.64942100  | H |
| H-H_     | 0 | 2.56007800  | -3.10931400 | 5.78410200  | H |
| H-H_     | 0 | 1.37723300  | -1.12362600 | 6.70689300  | H |
| H-H_     | 0 | -0.56972100 | -0.17296100 | 5.53510200  | H |
| C-C_3    | 0 | -2.39758200 | 0.12763300  | 3.59363300  | H |
| H-H_     | 0 | -1.76572600 | 1.02531200  | 3.49212800  | H |
| H-H_     | 0 | -3.27400900 | 0.26457400  | 2.94865200  | H |
| H-H_     | 0 | -2.74849900 | 0.09123000  | 4.63688200  | H |
| O-O_3    | 0 | 0.15099300  | 0.19908100  | -2.03704800 | H |
| Ru-Ru6+2 | 0 | -0.00623100 | 0.08221700  | -0.30358300 | H |
| C-C_3    | 0 | -4.08829800 | 3.32044400  | -2.76475500 | L |
| C-C_3    | 0 | -5.82578800 | 4.74594800  | -2.78857400 | L |
| C-C_R    | 0 | -5.43500400 | 4.56996100  | -1.35223000 | L |
| C-C_3    | 0 | -4.44814100 | 4.64195900  | -3.43592600 | L |
| H-H_     | 0 | -4.48980600 | 4.57233600  | -4.54802200 | L |
| H-H_     | 0 | -3.76660500 | 5.47594500  | -3.14348400 | L |
| C-C_3    | 0 | -5.25824600 | 2.43271000  | -3.23768700 | L |
| H-H_     | 0 | -5.05874200 | 2.04234800  | -4.25973300 | L |
| H-H_     | 0 | -5.43385300 | 1.58028200  | -2.54556000 | L |
| C-C_3    | 0 | -6.45906900 | 3.41646000  | -3.25187700 | L |
| H-H_     | 0 | -6.86841500 | 3.52041200  | -4.28068400 | L |
| H-H_     | 0 | -7.26781500 | 3.08583200  | -2.56314500 | L |
| H-H_     | 0 | -3.06971400 | 2.93075300  | -2.97510900 | L |
| H-H_     | 0 | -6.40484800 | 5.66498800  | -3.01963400 | L |
| C-C_3    | 0 | -4.43993000 | 6.01471400  | 2.95244900  | L |
| C-C_3    | 0 | -5.59821100 | 5.13596400  | 2.43445800  | L |
| C-C_3    | 0 | -3.86066300 | 3.71294800  | 2.47203300  | L |
| C-C_3    | 0 | -3.24004400 | 5.03064000  | 2.98027300  | L |
| H-H_     | 0 | -4.24672100 | 6.87780800  | 2.27757000  | L |
| H-H_     | 0 | -4.66470500 | 6.38779500  | 3.97573400  | L |
| H-H_     | 0 | -2.41099800 | 5.37498100  | 2.32427300  | L |
| H-H_     | 0 | -2.86056400 | 4.90386400  | 4.01793500  | L |
| C-C_3    | 0 | -5.25315000 | 3.80057400  | 3.08694500  | L |
| H-H_     | 0 | -5.92376400 | 2.97047400  | 2.76009900  | L |

|       |   |             |            |             |   |
|-------|---|-------------|------------|-------------|---|
| H-H_  | 0 | -5.23869600 | 3.84663500 | 4.20092600  | L |
| C-C_R | 0 | -5.28927500 | 4.79808200 | 1.00706600  | L |
| C-C_R | 0 | -4.21588000 | 3.91797800 | 1.02870200  | L |
| H-H_  | 0 | -6.62176700 | 5.52200000 | 2.62596500  | L |
| H-H_  | 0 | -3.28620200 | 2.79312700 | 2.69895600  | L |
| C-C_R | 0 | -3.71874700 | 3.32492500 | -0.14300700 | L |
| C-C_R | 0 | -5.93929000 | 5.15244600 | -0.18237600 | L |
| H-H_  | 0 | -6.78233700 | 5.83002300 | -0.19595900 | L |
| C-C_R | 0 | -4.36345800 | 3.68873500 | -1.33571900 | L |
| C-C_3 | 0 | 3.50739900  | 3.89346700 | 2.44685000  | L |
| C-C_3 | 0 | 5.01450600  | 5.56022500 | 2.49983400  | L |
| C-C_R | 0 | 4.70585700  | 5.30715600 | 1.05496600  | L |
| C-C_3 | 0 | 3.64489000  | 5.26336900 | 3.10313700  | L |
| H-H_  | 0 | 3.65659300  | 5.21693200 | 4.21714800  | L |
| H-H_  | 0 | 2.85890600  | 5.98305600 | 2.77172100  | L |
| C-C_3 | 0 | 4.77752600  | 3.19469000 | 2.97442500  | L |
| H-H_  | 0 | 4.60159800  | 2.79242700 | 3.99618500  | L |
| H-H_  | 0 | 5.10024700  | 2.36875600 | 2.30274200  | L |
| C-C_3 | 0 | 5.81922700  | 4.34543800 | 3.01026700  | L |
| H-H_  | 0 | 6.17094800  | 4.52339500 | 4.05019200  | L |
| H-H_  | 0 | 6.69246900  | 4.12816700 | 2.35607800  | L |
| H-H_  | 0 | 2.55019300  | 3.36079900 | 2.63065000  | L |
| H-H_  | 0 | 5.44358400  | 6.55793000 | 2.73177700  | L |
| C-C_3 | 0 | 3.65444200  | 6.50996400 | -3.30555800 | L |
| C-C_3 | 0 | 4.91827700  | 5.83000300 | -2.73670300 | L |
| C-C_3 | 0 | 3.42432400  | 4.15225500 | -2.80106200 | L |
| C-C_3 | 0 | 2.62307200  | 5.35042900 | -3.35080500 | L |
| H-H_  | 0 | 3.30766900  | 7.34172600 | -2.65314800 | L |
| H-H_  | 0 | 3.85153100  | 6.89931800 | -4.32849000 | L |
| H-H_  | 0 | 1.73066600  | 5.56937700 | -2.72385900 | L |
| H-H_  | 0 | 2.30040900  | 5.15284600 | -4.39655500 | L |
| C-C_3 | 0 | 4.80610600  | 4.44858500 | -3.37462600 | L |
| H-H_  | 0 | 5.58671400  | 3.73791900 | -3.01238200 | L |
| H-H_  | 0 | 4.82155200  | 4.47719600 | -4.48917700 | L |
| C-C_R | 0 | 4.61943800  | 5.46757300 | -1.31323600 | L |
| C-C_R | 0 | 3.69521300  | 4.43286400 | -1.35186800 | L |
| H-H_  | 0 | 5.87497700  | 6.36841300 | -2.90461200 | L |
| H-H_  | 0 | 3.00925600  | 3.14756400 | -3.02899300 | L |

|       |   |             |             |             |   |
|-------|---|-------------|-------------|-------------|---|
| C-C_R | 0 | 3.24228600  | 3.79899300  | -0.18462800 | L |
| C-C_R | 0 | 5.16162800  | 5.93844300  | -0.10991000 | L |
| H-H_  | 0 | 5.89105200  | 6.73668400  | -0.08234800 | L |
| C-C_R | 0 | 3.77723300  | 4.27689900  | 1.02120800  | L |
| C-C_3 | 0 | 4.67253500  | -3.18446700 | 1.84528400  | L |
| C-C_3 | 0 | 6.51411200  | -4.39164100 | 1.40166700  | L |
| C-C_R | 0 | 5.73269300  | -4.31505900 | 0.12425700  | L |
| C-C_3 | 0 | 6.18183400  | -3.02089500 | 1.98348200  | L |
| H-H_  | 0 | 6.51425500  | -2.89998900 | 3.04089100  | L |
| H-H_  | 0 | 6.58493300  | -2.17980000 | 1.37093500  | L |
| C-C_3 | 0 | 4.44852100  | -4.47826600 | 2.65719800  | L |
| H-H_  | 0 | 4.37466400  | -4.24800800 | 3.74271800  | L |
| H-H_  | 0 | 3.53355900  | -5.01557000 | 2.32362100  | L |
| C-C_3 | 0 | 5.72509900  | -5.30711800 | 2.35846600  | L |
| H-H_  | 0 | 6.30482500  | -5.48437500 | 3.29090300  | L |
| H-H_  | 0 | 5.47988900  | -6.28288800 | 1.88358300  | L |
| H-H_  | 0 | 4.05831300  | -2.31152600 | 2.15274900  | L |
| H-H_  | 0 | 7.59436200  | -4.62457500 | 1.29101400  | L |
| C-C_3 | 0 | 5.60335700  | -3.14160800 | -4.25963100 | L |
| C-C_3 | 0 | 5.23960700  | -4.52141700 | -3.66970200 | L |
| C-C_3 | 0 | 3.40736300  | -3.29051000 | -3.24901600 | L |
| C-C_3 | 0 | 4.33715600  | -2.29144000 | -3.96863300 | L |
| H-H_  | 0 | 6.50618600  | -2.71216700 | -3.77153500 | L |
| H-H_  | 0 | 5.77791300  | -3.22265600 | -5.35497200 | L |
| H-H_  | 0 | 4.57027200  | -1.41316800 | -3.32675600 | L |
| H-H_  | 0 | 3.87154700  | -1.94329500 | -4.91662600 | L |
| C-C_3 | 0 | 3.74957100  | -4.57858700 | -3.98940300 | L |
| H-H_  | 0 | 3.24614800  | -5.47463600 | -3.55449700 | L |
| H-H_  | 0 | 3.53246600  | -4.52772900 | -5.08195600 | L |
| C-C_R | 0 | 5.16555700  | -4.35700700 | -2.18157700 | L |
| C-C_R | 0 | 4.03472600  | -3.59691800 | -1.91989300 | L |
| H-H_  | 0 | 5.84607500  | -5.37981400 | -4.02831300 | L |
| H-H_  | 0 | 2.33033400  | -3.02052700 | -3.22364100 | L |
| C-C_R | 0 | 3.72671400  | -3.14288300 | -0.62749300 | L |
| C-C_R | 0 | 6.06830000  | -4.71868700 | -1.17436000 | L |
| H-H_  | 0 | 6.98522800  | -5.25023700 | -1.39064100 | L |
| C-C_R | 0 | 4.59704000  | -3.56066600 | 0.39386100  | L |
| C-C_3 | 0 | -3.35128700 | -4.32974700 | 2.18794600  | L |



|       |   |             |             |             |   |
|-------|---|-------------|-------------|-------------|---|
| C-C_3 | 0 | -4.99649300 | -5.84243900 | 1.97122700  | L |
| C-C_R | 0 | -4.71122200 | -5.31701600 | 0.59703600  | L |
| C-C_3 | 0 | -3.58888000 | -5.79111800 | 2.55211400  | L |
| H-H_  | 0 | -3.55970900 | -5.97989700 | 3.65071500  | L |
| H-H_  | 0 | -2.88121800 | -6.48532800 | 2.03942900  | L |
| C-C_3 | 0 | -4.53243600 | -3.65670600 | 2.91495000  | L |
| H-H_  | 0 | -4.28549300 | -3.49674200 | 3.98745900  | L |
| H-H_  | 0 | -4.79935200 | -2.68265800 | 2.44853200  | L |
| C-C_3 | 0 | -5.67195400 | -4.70040500 | 2.76242800  | L |
| H-H_  | 0 | -6.00573200 | -5.06434300 | 3.75887400  | L |
| H-H_  | 0 | -6.54183200 | -4.27914400 | 2.21148200  | L |
| H-H_  | 0 | -2.34460500 | -3.94336000 | 2.43223400  | L |
| H-H_  | 0 | -5.50467700 | -6.82901200 | 2.01260600  | L |
| C-C_3 | 0 | -4.13553800 | -5.40646300 | -4.02983500 | L |
| C-C_3 | 0 | -5.27825800 | -4.83933800 | -3.16077400 | L |
| C-C_3 | 0 | -3.66733100 | -3.28788900 | -2.95497100 | L |
| C-C_3 | 0 | -3.02219200 | -4.33419100 | -3.88673000 | L |
| H-H_  | 0 | -3.79670900 | -6.40083200 | -3.66362000 | L |
| H-H_  | 0 | -4.46184300 | -5.49365900 | -5.08944500 | L |
| H-H_  | 0 | -2.09500200 | -4.76037700 | -3.44296800 | L |
| H-H_  | 0 | -2.78546700 | -3.87989600 | -4.87382400 | L |
| C-C_3 | 0 | -5.11741800 | -3.34528400 | -3.42246800 | L |
| H-H_  | 0 | -5.79823300 | -2.71855300 | -2.79846200 | L |
| H-H_  | 0 | -5.24329800 | -3.07144200 | -4.49595600 | L |
| C-C_R | 0 | -4.81380400 | -4.89084400 | -1.73635500 | L |
| C-C_R | 0 | -3.81650800 | -3.93381000 | -1.60739600 | L |
| H-H_  | 0 | -6.28726100 | -5.26181300 | -3.35270100 | L |
| H-H_  | 0 | -3.19636800 | -2.28215600 | -2.96208600 | L |
| C-C_R | 0 | -3.23420200 | -3.62833100 | -0.36622500 | L |
| C-C_R | 0 | -5.31071200 | -5.60084000 | -0.63628100 | L |
| H-H_  | 0 | -6.12190100 | -6.31023100 | -0.73002700 | L |
| C-C_R | 0 | -3.69931900 | -4.37571000 | 0.72892700  | L |

**<sup>1</sup>Ru (por\*) O (OSS)**

|       |   |            |             |            |   |
|-------|---|------------|-------------|------------|---|
| C-C_R | 0 | 3.03849100 | -0.45317100 | 0.04364900 | H |
| C-C_R | 0 | 4.01996100 | -1.50708500 | 0.11015700 | H |
| C-C_R | 0 | 3.35115400 | -2.68335700 | 0.11470000 | H |
| C-C_R | 0 | 1.94339300 | -2.37956800 | 0.04751800 | H |

|          |   |             |             |             |   |
|----------|---|-------------|-------------|-------------|---|
| N-N_R    | 0 | 1.78746600  | -1.01641100 | 0.01757900  | H |
| C-C_R    | 0 | 3.32712300  | 0.91479500  | 0.01901100  | H |
| C-C_R    | 0 | 0.91553500  | -3.32737200 | 0.02379100  | H |
| C-C_R    | 0 | -0.45284600 | -3.03983600 | 0.00827300  | H |
| C-C_R    | 0 | -1.50767900 | -4.02250400 | 0.01658100  | H |
| C-C_R    | 0 | -2.68407800 | -3.35390500 | 0.01503800  | H |
| C-C_R    | 0 | -2.37926900 | -1.94485000 | 0.00298200  | H |
| N-N_R    | 0 | -1.01592700 | -1.78856700 | 0.00147400  | H |
| C-C_R    | 0 | -3.32625900 | -0.91596700 | 0.01095300  | H |
| C-C_R    | 0 | -3.03703700 | 0.45204800  | 0.03310600  | H |
| C-C_R    | 0 | -4.01850800 | 1.50618400  | 0.09438000  | H |
| C-C_R    | 0 | -3.34967500 | 2.68242000  | 0.09988900  | H |
| C-C_R    | 0 | -1.94171800 | 2.37865900  | 0.03899400  | H |
| N-N_R    | 0 | -1.78578600 | 1.01534100  | 0.01002400  | H |
| C-C_R    | 0 | -0.91396800 | 3.32687400  | 0.02167500  | H |
| C-C_R    | 0 | 0.45443100  | 3.03922400  | 0.01205700  | H |
| C-C_R    | 0 | 1.50950300  | 4.02160800  | 0.02469800  | H |
| C-C_R    | 0 | 2.68571500  | 3.35274000  | 0.02461500  | H |
| C-C_R    | 0 | 2.38044100  | 1.94377900  | 0.01009700  | H |
| N-N_R    | 0 | 1.01719600  | 1.78779900  | 0.00571700  | H |
| H-H_     | 0 | 5.09558500  | -1.36863400 | 0.15450200  | H |
| H-H_     | 0 | 3.78257200  | -3.67808800 | 0.16431100  | H |
| H-H_     | 0 | -1.36999200 | -5.09906500 | 0.02631600  | H |
| H-H_     | 0 | -3.67948900 | -3.78643600 | 0.02476700  | H |
| H-H_     | 0 | -5.09430500 | 1.36789800  | 0.13409600  | H |
| H-H_     | 0 | -3.78121300 | 3.67722800  | 0.14619500  | H |
| H-H_     | 0 | 1.37220700  | 5.09818700  | 0.03577500  | H |
| H-H_     | 0 | 3.68124300  | 3.78497100  | 0.03774000  | H |
| Ru-Ru6+2 | 0 | 0.00131000  | -0.00049200 | -0.23792900 | H |
| O-O_3    | 0 | 0.00608500  | -0.00078800 | -1.98401200 | H |
| C-C_3    | 0 | -1.33076500 | 5.04555200  | 2.66940400  | L |
| C-C_3    | 0 | -1.93099900 | 7.21120300  | 2.69017800  | L |
| C-C_R    | 0 | -1.81823600 | 6.81144700  | 1.24989500  | L |
| C-C_3    | 0 | -2.44180400 | 5.89755600  | 3.27424500  | L |
| H-H_     | 0 | -2.44652100 | 5.88527700  | 4.38920500  | L |
| H-H_     | 0 | -3.45476700 | 5.61916600  | 2.89742500  | L |
| C-C_3    | 0 | -0.08493600 | 5.74448100  | 3.25201900  | L |
| H-H_     | 0 | 0.11371300  | 5.38312800  | 4.28484100  | L |

|       |   |             |             |             |   |
|-------|---|-------------|-------------|-------------|---|
| H-H_  | 0 | 0.81487300  | 5.57245400  | 2.62120600  | L |
| C-C_3 | 0 | -0.49866000 | 7.24074000  | 3.26529300  | L |
| H-H_  | 0 | -0.50698800 | 7.63582200  | 4.30485000  | L |
| H-H_  | 0 | 0.18167200  | 7.85963700  | 2.63933200  | L |
| H-H_  | 0 | -1.40239800 | 3.95261400  | 2.85353900  | L |
| H-H_  | 0 | -2.55259400 | 8.10904800  | 2.89226700  | L |
| C-C_3 | 0 | -3.34024500 | 6.52246100  | -3.11197600 | L |
| C-C_3 | 0 | -2.08910800 | 7.23200000  | -2.55117600 | L |
| C-C_3 | 0 | -1.47485300 | 5.07013700  | -2.58432100 | L |
| C-C_3 | 0 | -2.91527400 | 5.02935100  | -3.13548200 | L |
| H-H_  | 0 | -4.22915600 | 6.68542100  | -2.46311000 | L |
| H-H_  | 0 | -3.56151000 | 6.88330600  | -4.14039900 | L |
| H-H_  | 0 | -3.57979400 | 4.40286100  | -2.50034600 | L |
| H-H_  | 0 | -2.92048400 | 4.63625100  | -4.17575600 | L |
| C-C_3 | 0 | -0.98291600 | 6.38710000  | -3.17589500 | L |
| H-H_  | 0 | 0.03516900  | 6.66970900  | -2.81645000 | L |
| H-H_  | 0 | -0.99739100 | 6.39984900  | -4.29076400 | L |
| C-C_R | 0 | -1.94577900 | 6.80493100  | -1.12160000 | L |
| C-C_R | 0 | -1.56820300 | 5.46966700  | -1.14079100 | L |
| H-H_  | 0 | -2.02947900 | 8.32579500  | -2.73401400 | L |
| H-H_  | 0 | -0.84929800 | 4.17776500  | -2.79866300 | L |
| C-C_R | 0 | -1.30733500 | 4.75520400  | 0.03844200  | L |
| C-C_R | 0 | -2.08467700 | 7.52358900  | 0.07307600  | L |
| H-H_  | 0 | -2.38220200 | 8.56347300  | 0.08621800  | L |
| C-C_R | 0 | -1.44570400 | 5.47465200  | 1.23572400  | L |
| C-C_3 | 0 | -4.98831700 | -1.57417700 | 2.64556200  | L |
| C-C_3 | 0 | -7.15636600 | -2.16611700 | 2.65876300  | L |
| C-C_R | 0 | -6.78587500 | -1.92738200 | 1.22606400  | L |
| C-C_3 | 0 | -5.83372700 | -2.73118100 | 3.16772000  | L |
| H-H_  | 0 | -5.79840900 | -2.83439900 | 4.27739800  | L |
| H-H_  | 0 | -5.56854100 | -3.70784300 | 2.69717000  | L |
| C-C_3 | 0 | -5.66826500 | -0.38167100 | 3.34941000  | L |
| H-H_  | 0 | -5.28411200 | -0.27479600 | 4.38755800  | L |
| H-H_  | 0 | -5.50469800 | 0.56878000  | 2.79468500  | L |
| C-C_3 | 0 | -7.16611100 | -0.79014900 | 3.35875600  | L |
| H-H_  | 0 | -7.53881500 | -0.88920900 | 4.40189100  | L |
| H-H_  | 0 | -7.79482600 | -0.05509700 | 2.80910600  | L |
| H-H_  | 0 | -3.89228900 | -1.66588000 | 2.79993100  | L |

|       |   |             |             |             |   |
|-------|---|-------------|-------------|-------------|---|
| H-H_  | 0 | -8.05318200 | -2.80000800 | 2.82386800  | L |
| C-C_3 | 0 | -6.60120700 | -3.02766400 | -3.26383300 | L |
| C-C_3 | 0 | -7.29273000 | -1.83273600 | -2.57293400 | L |
| C-C_3 | 0 | -5.12930700 | -1.22352600 | -2.59625200 | L |
| C-C_3 | 0 | -5.10682900 | -2.60649400 | -3.27955500 | L |
| H-H_  | 0 | -6.75462800 | -3.97314600 | -2.69790900 | L |
| H-H_  | 0 | -6.98486500 | -3.15035400 | -4.30045300 | L |
| H-H_  | 0 | -4.47024800 | -3.32847900 | -2.72140500 | L |
| H-H_  | 0 | -4.73551800 | -2.51621500 | -4.32391900 | L |
| C-C_3 | 0 | -6.45653500 | -0.67511100 | -3.10998900 | L |
| H-H_  | 0 | -6.72646000 | 0.30561300  | -2.65073600 | L |
| H-H_  | 0 | -6.49352500 | -0.58518200 | -4.22076700 | L |
| C-C_R | 0 | -6.83392500 | -1.82526200 | -1.14604400 | L |
| C-C_R | 0 | -5.49768500 | -1.45072300 | -1.15943900 | L |
| H-H_  | 0 | -8.38997000 | -1.75349400 | -2.72513700 | L |
| H-H_  | 0 | -4.23908600 | -0.58282000 | -2.77111200 | L |
| C-C_R | 0 | -4.75506700 | -1.30791100 | 0.02246300  | L |
| C-C_R | 0 | -7.52620700 | -2.07625500 | 0.04592500  | L |
| H-H_  | 0 | -8.56755900 | -2.36883200 | 0.05444500  | L |
| C-C_R | 0 | -5.44757800 | -1.56022100 | 1.21686100  | L |
| C-C_3 | 0 | 5.11894000  | 1.22027600  | -2.59530800 | L |
| C-C_3 | 0 | 7.28156000  | 1.83264600  | -2.58158700 | L |
| C-C_R | 0 | 6.82889200  | 1.82524700  | -1.15268100 | L |
| C-C_3 | 0 | 6.44474700  | 0.67352000  | -3.11443800 | L |
| H-H_  | 0 | 6.47705000  | 0.58303300  | -4.22531500 | L |
| H-H_  | 0 | 6.71812800  | -0.30654600 | -2.65582600 | L |
| C-C_3 | 0 | 5.09144700  | 2.60286200  | -3.27915300 | L |
| H-H_  | 0 | 4.71554900  | 2.51153600  | -4.32178400 | L |
| H-H_  | 0 | 4.45637500  | 3.32423000  | -2.71847300 | L |
| C-C_3 | 0 | 6.58528700  | 3.02613100  | -3.27027000 | L |
| H-H_  | 0 | 6.96415500  | 3.14858900  | -4.30868200 | L |
| H-H_  | 0 | 6.73991300  | 3.97223400  | -2.70573000 | L |
| H-H_  | 0 | 4.22891300  | 0.57814600  | -2.76592400 | L |
| H-H_  | 0 | 8.37822000  | 1.75490900  | -2.73852700 | L |
| C-C_3 | 0 | 7.17864600  | 0.79779500  | 3.35361100  | L |
| C-C_3 | 0 | 7.16534400  | 2.17219700  | 2.65054100  | L |
| C-C_3 | 0 | 4.99778100  | 1.57837600  | 2.64624000  | L |
| C-C_3 | 0 | 5.68113600  | 0.38805300  | 3.35041000  | L |

|       |   |             |             |             |   |
|-------|---|-------------|-------------|-------------|---|
| H-H_  | 0 | 7.80608100  | 0.06202200  | 2.80347100  | L |
| H-H_  | 0 | 7.55483500  | 0.89949800  | 4.39523800  | L |
| H-H_  | 0 | 5.51646000  | -0.56381100 | 2.79845800  | L |
| H-H_  | 0 | 5.30062400  | 0.28326000  | 4.39010700  | L |
| C-C_3 | 0 | 5.84400100  | 2.73728900  | 3.16281600  | L |
| H-H_  | 0 | 5.57640700  | 3.71267100  | 2.69097300  | L |
| H-H_  | 0 | 5.81242700  | 2.84297500  | 4.27237400  | L |
| C-C_R | 0 | 6.79007300  | 1.93001000  | 1.21961700  | L |
| C-C_R | 0 | 5.45220300  | 1.56151700  | 1.21603600  | L |
| H-H_  | 0 | 8.06217600  | 2.80715600  | 2.81120700  | L |
| H-H_  | 0 | 3.90220600  | 1.66953000  | 2.80414700  | L |
| C-C_R | 0 | 4.75547300  | 1.30697400  | 0.02466400  | L |
| C-C_R | 0 | 7.52551700  | 2.07869800  | 0.03631400  | L |
| H-H_  | 0 | 8.56628100  | 2.37322400  | 0.04035200  | L |
| C-C_R | 0 | 5.49324300  | 1.44881600  | -1.16026600 | L |
| C-C_3 | 0 | 1.33015600  | -5.04873300 | 2.66971800  | L |
| C-C_3 | 0 | 1.92734200  | -7.21526100 | 2.68849900  | L |
| C-C_R | 0 | 1.81704200  | -6.81349200 | 1.24855700  | L |
| C-C_3 | 0 | 2.43919800  | -5.90307900 | 3.27492800  | L |
| H-H_  | 0 | 2.44244200  | -5.89222100 | 4.38990800  | L |
| H-H_  | 0 | 3.45306200  | -5.62566400 | 2.89981800  | L |
| C-C_3 | 0 | 0.08255000  | -5.74662000 | 3.24971800  | L |
| H-H_  | 0 | -0.11706300 | -5.38621100 | 4.28268300  | L |
| H-H_  | 0 | -0.81610300 | -5.57257100 | 2.61778100  | L |
| C-C_3 | 0 | 0.49419700  | -7.24346700 | 3.26174000  | L |
| H-H_  | 0 | 0.50063300  | -7.63975500 | 4.30085200  | L |
| H-H_  | 0 | -0.18618100 | -7.86069600 | 2.63419300  | L |
| H-H_  | 0 | 1.40313300  | -3.95613000 | 2.85530800  | L |
| H-H_  | 0 | 2.54739600  | -8.11421800 | 2.89029800  | L |
| C-C_3 | 0 | 3.33930700  | -6.52141300 | -3.11354100 | L |
| C-C_3 | 0 | 2.08765000  | -7.23031000 | -2.55304600 | L |
| C-C_3 | 0 | 1.47555800  | -5.06780400 | -2.58380200 | L |
| C-C_3 | 0 | 2.91589000  | -5.02782400 | -3.13518000 | L |
| H-H_  | 0 | 4.22832000  | -6.68606800 | -2.46524900 | L |
| H-H_  | 0 | 3.55975400  | -6.88129200 | -4.14248000 | L |
| H-H_  | 0 | 3.58112000  | -4.40278500 | -2.49929000 | L |
| H-H_  | 0 | 2.92130300  | -4.63344100 | -4.17496700 | L |
| C-C_3 | 0 | 0.98211500  | -6.38365900 | -3.17656100 | L |

|       |   |             |             |             |   |
|-------|---|-------------|-------------|-------------|---|
| H-H_  | 0 | -0.03613600 | -6.66562600 | -2.81706800 | L |
| H-H_  | 0 | 0.99622000  | -6.39524600 | -4.29144400 | L |
| C-C_R | 0 | 1.94518800  | -6.80457500 | -1.12296000 | L |
| C-C_R | 0 | 1.56898900  | -5.46894100 | -1.14076000 | L |
| H-H_  | 0 | 2.02688200  | -8.32384000 | -2.73702700 | L |
| H-H_  | 0 | 0.85083200  | -4.17457600 | -2.79702200 | L |
| C-C_R | 0 | 1.30870300  | -4.75554000 | 0.03914700  | L |
| C-C_R | 0 | 2.08273700  | -7.52476600 | 0.07100500  | L |
| H-H_  | 0 | 2.37844100  | -8.56514900 | 0.08308000  | L |
| C-C_R | 0 | 1.44634400  | -5.47624000 | 1.23568900  | L |

### **S\_1TS1 (M06)**

|   |  |             |             |             |  |
|---|--|-------------|-------------|-------------|--|
| C |  | 1.09840800  | 2.75833300  | -0.58495700 |  |
| C |  | 0.76688300  | 4.15770600  | -0.60514100 |  |
| C |  | -0.57658900 | 4.26286200  | -0.41357100 |  |
| C |  | -1.09951800 | 2.92792300  | -0.30531600 |  |
| N |  | -0.06027700 | 2.04218900  | -0.40989600 |  |
| C |  | 2.39377100  | 2.23724600  | -0.69044500 |  |
| C |  | -2.45179200 | 2.60878100  | -0.13462300 |  |
| C |  | -2.98864100 | 1.31409500  | -0.11492100 |  |
| C |  | -4.38487200 | 0.99979200  | 0.03825200  |  |
| C |  | -4.49947100 | -0.35527500 | -0.01249600 |  |
| C |  | -3.17434400 | -0.89187500 | -0.18528000 |  |
| N |  | -2.29120100 | 0.15154300  | -0.25106900 |  |
| C |  | -2.86431700 | -2.25574800 | -0.24312600 |  |
| C |  | -1.56952700 | -2.79560800 | -0.32785700 |  |
| C |  | -1.25148200 | -4.20300900 | -0.34168400 |  |
| C |  | 0.10445000  | -4.30366900 | -0.37021900 |  |
| C |  | 0.62988300  | -2.95890500 | -0.38994500 |  |
| N |  | -0.41353100 | -2.08842300 | -0.37127300 |  |
| C |  | 1.99341200  | -2.62630400 | -0.41302400 |  |
| C |  | 2.53302600  | -1.33124500 | -0.46293400 |  |
| C |  | 3.93870800  | -1.02822200 | -0.53831200 |  |
| C |  | 4.05557400  | 0.32579300  | -0.64044500 |  |
| C |  | 2.72137400  | 0.86879400  | -0.62397200 |  |
| N |  | 1.83708600  | -0.15734100 | -0.50034200 |  |
| H |  | 1.48469900  | 4.95884300  | -0.74514800 |  |
| H |  | -1.17716000 | 5.16558800  | -0.36996300 |  |

|    |             |             |             |
|----|-------------|-------------|-------------|
| H  | -5.17212300 | 1.73467600  | 0.17070100  |
| H  | -5.40113500 | -0.95382300 | 0.06467300  |
| H  | -1.98337200 | -5.00370100 | -0.32015200 |
| H  | 0.70880500  | -5.20469100 | -0.38111300 |
| H  | 4.73219100  | -1.76829200 | -0.51555700 |
| H  | 4.96359800  | 0.91488100  | -0.71867600 |
| Ru | -0.24547900 | 0.00282800  | -0.42914700 |
| O  | -0.26203000 | -0.19749400 | -2.17029000 |
| O  | -0.10140300 | -0.21214300 | 1.41218800  |
| C  | 2.79202200  | -4.33471800 | -2.97574400 |
| C  | 4.24141900  | -6.06485300 | -2.95077800 |
| C  | 4.13381400  | -5.58252200 | -1.52548800 |
| C  | 2.80729400  | -5.80015400 | -3.44301900 |
| H  | 2.69750400  | -5.90693700 | -4.53204600 |
| H  | 2.05532000  | -6.41901900 | -2.93541200 |
| C  | 4.01809500  | -3.77688700 | -3.74220600 |
| H  | 3.73451300  | -3.50663900 | -4.76824900 |
| H  | 4.41652900  | -2.87357000 | -3.26244600 |
| C  | 5.01331200  | -4.96645600 | -3.72812100 |
| H  | 5.23684800  | -5.30875700 | -4.74784400 |
| H  | 5.96746300  | -4.72218900 | -3.24500900 |
| H  | 1.86709600  | -3.76699800 | -3.12590100 |
| H  | 4.64002100  | -7.07727300 | -3.08296100 |
| C  | 3.72819200  | -5.92023400 | 3.00037100  |
| C  | 4.95484800  | -5.37866600 | 2.21987100  |
| C  | 3.51015600  | -3.64287000 | 2.18415600  |
| C  | 2.73817300  | -4.72668600 | 2.97658600  |
| H  | 3.31996600  | -6.82625100 | 2.53556200  |
| H  | 4.01624700  | -6.17744400 | 4.02893900  |
| H  | 1.77858800  | -4.96962300 | 2.50231100  |
| H  | 2.52217700  | -4.36471000 | 3.99132000  |
| C  | 4.94516200  | -3.90733200 | 2.67136500  |
| H  | 5.69281700  | -3.29217800 | 2.15098300  |
| H  | 5.05858400  | -3.78472200 | 3.75902500  |
| C  | 4.51678000  | -5.22228500 | 0.78492700  |
| C  | 3.61909200  | -4.14448300 | 0.76652800  |
| H  | 5.87824000  | -5.94810400 | 2.37672300  |
| H  | 3.11664300  | -2.62690400 | 2.30984600  |

|   |             |             |             |
|---|-------------|-------------|-------------|
| C | 2.95634700  | -3.76136100 | -0.39855000 |
| C | 4.79165700  | -5.96091500 | -0.36029200 |
| H | 5.49152500  | -6.79815400 | -0.34576000 |
| C | 3.23405100  | -4.50716400 | -1.54396000 |
| C | -4.74942300 | -2.94401500 | -2.70202500 |
| C | -6.45636000 | -4.41866600 | -2.62841600 |
| C | -5.88381200 | -4.36410400 | -1.23393600 |
| C | -6.24120600 | -2.96182600 | -3.07546000 |
| H | -6.41888900 | -2.80893600 | -4.14986200 |
| H | -6.83526800 | -2.24067600 | -2.49816100 |
| C | -4.22472800 | -4.13034000 | -3.55009600 |
| H | -4.01877900 | -3.80291000 | -4.57789700 |
| H | -3.29027000 | -4.53462200 | -3.13954900 |
| C | -5.40011200 | -5.14137200 | -3.50539800 |
| H | -5.80346300 | -5.32533000 | -4.51061600 |
| H | -5.11550600 | -6.11191500 | -3.08068100 |
| H | -4.20357900 | -2.00571900 | -2.84933300 |
| H | -7.47004700 | -4.82683000 | -2.71279600 |
| C | -5.92210100 | -4.16820200 | 3.30735200  |
| C | -5.41609100 | -5.35430400 | 2.44522100  |
| C | -3.70210800 | -3.88797900 | 2.36153300  |
| C | -4.74539000 | -3.15971400 | 3.24644000  |
| H | -6.86135000 | -3.75573400 | 2.91865100  |
| H | -6.10768700 | -4.49974300 | 4.33817700  |
| H | -5.02945100 | -2.18908700 | 2.82004100  |
| H | -4.33045500 | -2.97103200 | 4.24573300  |
| C | -3.92008400 | -5.34436000 | 2.80643400  |
| H | -3.32991700 | -6.06350500 | 2.22278200  |
| H | -3.73345800 | -5.50020800 | 3.87896300  |
| C | -5.35673500 | -4.85271900 | 1.02391200  |
| C | -4.29123800 | -3.94218200 | 0.97371800  |
| H | -5.96465900 | -6.29083600 | 2.59783700  |
| H | -2.68604600 | -3.48525200 | 2.43520900  |
| C | -3.99812400 | -3.21711500 | -0.18183500 |
| C | -6.17145400 | -5.08266500 | -0.07905400 |
| H | -6.99716700 | -5.79513100 | -0.04024800 |
| C | -4.82313200 | -3.44799000 | -1.28258100 |
| C | 3.45297100  | 4.24624200  | 1.57472000  |



|   |             |            |             |
|---|-------------|------------|-------------|
| C | 5.19290700  | 5.65363600 | 1.29940900  |
| C | 4.99500400  | 4.95853200 | -0.02470800 |
| C | 3.73654600  | 5.74333700 | 1.78433700  |
| H | 3.64848400  | 6.05416700 | 2.83548700  |
| H | 3.11041500  | 6.39126100 | 1.15635900  |
| C | 4.55479400  | 3.61604100 | 2.46272700  |
| H | 4.22442100  | 3.56737700 | 3.51010500  |
| H | 4.78848700  | 2.58945300 | 2.14973100  |
| C | 5.74911300  | 4.58909500 | 2.28110700  |
| H | 6.02555500  | 5.06000800 | 3.23428600  |
| H | 6.64493800  | 4.09697100 | 1.88310200  |
| H | 2.43621900  | 3.90206700 | 1.79516100  |
| H | 5.77102000  | 6.58418000 | 1.26651000  |
| C | 4.61242200  | 4.64875200 | -4.52364900 |
| C | 5.74242700  | 4.01802900 | -3.66799600 |
| C | 4.02239800  | 2.58450900 | -3.38708800 |
| C | 3.42806100  | 3.66775200 | -4.32298800 |
| H | 4.38202200  | 5.67175100 | -4.20160900 |
| H | 4.91583800  | 4.69400300 | -5.57853000 |
| H | 2.54397700  | 4.14235700 | -3.87727200 |
| H | 3.11591200  | 3.21856800 | -5.27519600 |
| C | 5.46951600  | 2.52231200 | -3.90346400 |
| H | 6.11189000  | 1.86556600 | -3.30149000 |
| H | 5.53719800  | 2.23227200 | -4.96194400 |
| C | 5.30744300  | 4.15363000 | -2.23033300 |
| C | 4.23967700  | 3.26178000 | -2.05606300 |
| H | 6.74699900  | 4.38991500 | -3.89989600 |
| H | 3.45578800  | 1.64767200 | -3.36385700 |
| C | 3.51657400  | 3.19802200 | -0.86256800 |
| C | 5.70996200  | 5.01377100 | -1.21524300 |
| H | 6.54482600  | 5.70380300 | -1.34809200 |
| C | 3.91526300  | 4.07888900 | 0.14661700  |
| C | -3.76552000 | 4.30895300 | -2.50036700 |
| C | -5.18640700 | 6.03391400 | -2.18262700 |
| C | -4.78877400 | 5.55522900 | -0.80837900 |
| C | -3.88077300 | 5.77412400 | -2.95545900 |
| H | -3.99445400 | 5.88011800 | -4.04413700 |
| H | -3.04416900 | 6.39667800 | -2.61097200 |

|   |             |             |             |
|---|-------------|-------------|-------------|
| C | -5.11864500 | 3.74605900  | -3.00403600 |
| H | -5.04751000 | 3.47884400  | -4.06692100 |
| H | -5.40814400 | 2.84012400  | -2.45603600 |
| C | -6.09533300 | 4.93100300  | -2.78619300 |
| H | -6.52442800 | 5.27162200  | -3.73837600 |
| H | -6.92921700 | 4.68217700  | -2.11830300 |
| H | -2.88678700 | 3.74507000  | -2.83285000 |
| H | -5.60775500 | 7.04446000  | -2.23243000 |
| C | -3.42286100 | 5.92768700  | 3.51060900  |
| C | -4.79255500 | 5.38052900  | 3.02818400  |
| C | -3.39362700 | 3.64056800  | 2.69598700  |
| C | -2.46140100 | 4.73197700  | 3.28063300  |
| H | -3.12752500 | 6.82762600  | 2.95727200  |
| H | -3.47453700 | 6.19547600  | 4.57479300  |
| H | -1.63531500 | 4.96722800  | 2.59559800  |
| H | -2.01872900 | 4.38984800  | 4.22649900  |
| C | -4.68458100 | 3.91501900  | 3.48624300  |
| H | -5.52845000 | 3.29578500  | 3.15463900  |
| H | -4.55578700 | 3.81077200  | 4.57345400  |
| C | -4.67993100 | 5.20838200  | 1.53347500  |
| C | -3.80719500 | 4.13017800  | 1.33109000  |
| H | -5.65741300 | 5.95479200  | 3.37951400  |
| H | -2.98400500 | 2.62417600  | 2.73374700  |
| C | -3.39696100 | 3.74273900  | 0.05614500  |
| C | -5.18873900 | 5.94072900  | 0.46630400  |
| H | -5.86852400 | 6.78011800  | 0.62174500  |
| C | -3.90907200 | 4.48108100  | -1.00924700 |
| C | 2.79503000  | -0.90697400 | 5.54184800  |
| C | 1.96323200  | -0.10979800 | 4.76680900  |
| C | 2.39451600  | 0.38675800  | 3.52628000  |
| C | 3.68302900  | 0.03602800  | 3.08597700  |
| C | 4.51998700  | -0.74570500 | 3.86841700  |
| C | 4.07978200  | -1.22158900 | 5.10243400  |
| H | 2.44192500  | -1.28095400 | 6.50194000  |
| H | 0.96303700  | 0.13278300  | 5.12397700  |
| H | 4.01627700  | 0.38708300  | 2.10692800  |
| H | 5.52047300  | -0.99073300 | 3.51338200  |
| H | 4.73505900  | -1.83593600 | 5.71880700  |

|   |             |            |            |
|---|-------------|------------|------------|
| C | 1.54570400  | 1.22143100 | 2.67282700 |
| C | 0.50100000  | 2.11771600 | 3.28622100 |
| H | 0.81522400  | 0.40823600 | 1.98734900 |
| H | 2.11775700  | 1.70567600 | 1.87090500 |
| H | 0.95221100  | 2.86504700 | 3.95915100 |
| H | -0.04871500 | 2.65343900 | 2.49859300 |
| H | -0.23948300 | 1.54924200 | 3.86554300 |

**R\_1TS1 (M06)**

|   |             |             |             |
|---|-------------|-------------|-------------|
| C | 2.65819700  | 1.45142500  | -0.35518700 |
| C | 3.26427400  | 2.75589200  | -0.36444700 |
| C | 2.25580600  | 3.67009400  | -0.36045300 |
| C | 1.01473100  | 2.94202600  | -0.35368600 |
| N | 1.30064100  | 1.60155800  | -0.35227100 |
| C | 3.35918400  | 0.23807400  | -0.35508200 |
| C | -0.25612200 | 3.52725000  | -0.33891100 |
| C | -1.47719400 | 2.83190300  | -0.30822400 |
| C | -2.78307000 | 3.44201800  | -0.24038800 |
| C | -3.69071600 | 2.43134700  | -0.17983400 |
| C | -2.95165900 | 1.19165000  | -0.22380500 |
| N | -1.62567000 | 1.48433400  | -0.30977000 |
| C | -3.52410700 | -0.08858400 | -0.17248500 |
| C | -2.82995000 | -1.30941400 | -0.20507200 |
| C | -3.44974900 | -2.61052500 | -0.23613900 |
| C | -2.45082700 | -3.53111900 | -0.33335000 |
| C | -1.20784000 | -2.80316700 | -0.34805200 |
| N | -1.47874100 | -1.47480800 | -0.25785700 |
| C | 0.07190400  | -3.38107000 | -0.41563700 |
| C | 1.28051300  | -2.67673400 | -0.37519500 |
| C | 2.58518800  | -3.28159000 | -0.40019800 |
| C | 3.50181900  | -2.27570800 | -0.36335500 |
| C | 2.77500100  | -1.03533800 | -0.33035300 |
| N | 1.43513300  | -1.31316200 | -0.31391500 |
| H | 4.33393400  | 2.93862200  | -0.36416800 |
| H | 2.33450800  | 4.75224800  | -0.36209900 |
| H | -2.96756000 | 4.51112300  | -0.22820600 |
| H | -4.77109600 | 2.50514900  | -0.11203500 |
| H | -4.51962300 | -2.78725800 | -0.19884700 |

|    |             |             |             |
|----|-------------|-------------|-------------|
| H  | -2.53764300 | -4.61105000 | -0.39319400 |
| H  | 2.76748900  | -4.35043600 | -0.44119600 |
| H  | 4.58389600  | -2.35587500 | -0.37686100 |
| Ru | -0.07123300 | 0.07995200  | -0.35369300 |
| O  | -0.32139700 | 0.03381500  | -2.08750300 |
| O  | -0.28252200 | 0.18142800  | 1.48896800  |
| C  | -0.38568000 | -4.76852500 | -3.19750700 |
| C  | -0.27336600 | -6.99277000 | -3.56613100 |
| C  | -0.04121500 | -6.79574500 | -2.08885600 |
| C  | -1.26598900 | -5.85030800 | -3.84612800 |
| H  | -1.43777900 | -5.68050200 | -4.91888600 |
| H  | -2.22954700 | -5.97993300 | -3.33539800 |
| C  | 0.91595800  | -4.92289800 | -4.02460600 |
| H  | 0.83661600  | -4.36222300 | -4.96549800 |
| H  | 1.78708200  | -4.53336300 | -3.48214700 |
| C  | 0.99078300  | -6.45015700 | -4.28297100 |
| H  | 0.94275500  | -6.67391500 | -5.35745200 |
| H  | 1.90759800  | -6.90744500 | -3.89082700 |
| H  | -0.78195800 | -3.74757600 | -3.16496600 |
| H  | -0.56850100 | -8.00304600 | -3.87197100 |
| C  | -0.47832700 | -7.63043300 | 2.35760500  |
| C  | 0.81815700  | -7.77437200 | 1.51967500  |
| C  | 0.69287900  | -5.55294100 | 1.89116100  |
| C  | -0.56650200 | -6.10294700 | 2.60888900  |
| H  | -1.35154900 | -8.02825600 | 1.82622900  |
| H  | -0.38497500 | -8.18316300 | 3.30238300  |
| H  | -1.48716500 | -5.65269400 | 2.21463100  |
| H  | -0.52221900 | -5.87507700 | 3.68322400  |
| C  | 1.69377400  | -6.68771200 | 2.16813100  |
| H  | 2.65523100  | -6.54583900 | 1.65680300  |
| H  | 1.86910800  | -6.85583100 | 3.24065600  |
| C  | 0.53493500  | -7.13533900 | 0.18328200  |
| C  | 0.46112000  | -5.75265800 | 0.41320100  |
| H  | 1.22330500  | -8.79209900 | 1.48412000  |
| H  | 0.98360700  | -4.54171700 | 2.20027200  |
| C  | 0.13999400  | -4.85655600 | -0.60717600 |
| C  | 0.28624700  | -7.68256800 | -1.06982400 |
| H  | 0.34660800  | -8.75802400 | -1.24480300 |

|   |             |             |             |
|---|-------------|-------------|-------------|
| C | -0.11253900 | -5.41417600 | -1.86169300 |
| C | -5.52653300 | 0.37416200  | -2.61364800 |
| C | -7.77451600 | 0.25162700  | -2.45068000 |
| C | -7.23598100 | 0.01677300  | -1.06135300 |
| C | -6.73412600 | 1.25073000  | -2.98741700 |
| H | -6.82134600 | 1.42580600  | -4.06956800 |
| H | -6.74568000 | 2.21273500  | -2.45768100 |
| C | -5.86487400 | -0.92485200 | -3.38802700 |
| H | -5.54277300 | -0.83835900 | -4.43439500 |
| H | -5.35361500 | -1.79571400 | -2.95796400 |
| C | -7.40972800 | -1.00780600 | -3.27954900 |
| H | -7.88037800 | -0.95926400 | -4.27103900 |
| H | -7.75699400 | -1.92796400 | -2.79361800 |
| H | -4.52861200 | 0.77673500  | -2.81868800 |
| H | -8.82955700 | 0.54256200  | -2.51026600 |
| C | -6.98140200 | 0.45627100  | 3.45213100  |
| C | -7.33571200 | -0.84173700 | 2.67966900  |
| C | -5.08845000 | -0.73275200 | 2.50471600  |
| C | -5.43738000 | 0.53363900  | 3.32651900  |
| H | -7.49041800 | 1.33146700  | 3.02998400  |
| H | -7.28998400 | 0.36878500  | 4.50290500  |
| H | -5.08883400 | 1.44599000  | 2.82554200  |
| H | -4.95471300 | 0.49451200  | 4.31233500  |
| C | -6.13018200 | -1.72456400 | 3.04926300  |
| H | -6.12159300 | -2.68727000 | 2.52074500  |
| H | -6.03768600 | -1.89761800 | 4.13141800  |
| C | -7.03726100 | -0.56633900 | 1.22668500  |
| C | -5.64092000 | -0.49804200 | 1.12131400  |
| H | -8.33450700 | -1.23809400 | 2.89543300  |
| H | -4.03421800 | -1.02906400 | 2.55183300  |
| C | -5.00697400 | -0.16345000 | -0.07527500 |
| C | -7.86142200 | -0.31201500 | 0.13613500  |
| H | -8.94834800 | -0.36748600 | 0.21602900  |
| C | -5.83919300 | 0.09316000  | -1.16488400 |
| C | 5.32159800  | 0.63068000  | 2.12789600  |
| C | 7.57034700  | 0.71710400  | 1.97488900  |
| C | 7.05381100  | 0.58292800  | 0.56341000  |
| C | 6.44846800  | 1.56269400  | 2.60359800  |

|   |             |             |             |
|---|-------------|-------------|-------------|
| H | 6.51924300  | 1.62887400  | 3.69991600  |
| H | 6.37725600  | 2.57231900  | 2.17798400  |
| C | 5.76711200  | -0.71019200 | 2.76685200  |
| H | 5.43664200  | -0.76827600 | 3.81338800  |
| H | 5.33229300  | -1.57068400 | 2.24089800  |
| C | 7.31356600  | -0.64836800 | 2.66518900  |
| H | 7.77646400  | -0.66369800 | 3.66132100  |
| H | 7.73872800  | -1.48011300 | 2.09018900  |
| H | 4.29194400  | 0.93320700  | 2.35529800  |
| H | 8.59645400  | 1.08874100  | 2.07520100  |
| C | 6.74401900  | 1.43540000  | -3.89493800 |
| C | 7.21643000  | 0.10919000  | -3.24303400 |
| C | 4.96859500  | -0.00219600 | -3.07137100 |
| C | 5.19961300  | 1.35952000  | -3.77435400 |
| H | 7.17130900  | 2.31058800  | -3.39010400 |
| H | 7.05849200  | 1.47397700  | -4.94682100 |
| H | 4.76917600  | 2.18874800  | -3.19814400 |
| H | 4.72189200  | 1.36287300  | -4.76322400 |
| C | 6.09494100  | -0.84138900 | -3.69861500 |
| H | 6.17497500  | -1.84514400 | -3.26049200 |
| H | 6.01473000  | -0.92211200 | -4.79239100 |
| C | 6.89847900  | 0.21998500  | -1.77255100 |
| C | 5.50135100  | 0.15355200  | -1.66928000 |
| H | 8.24654300  | -0.17359100 | -3.48834800 |
| H | 3.94639100  | -0.38789000 | -3.15396200 |
| C | 4.84452800  | 0.30598500  | -0.44806900 |
| C | 7.70150100  | 0.43374000  | -0.65776700 |
| H | 8.78881500  | 0.48050200  | -0.73748000 |
| C | 5.65619300  | 0.52534200  | 0.66326800  |
| C | 0.09693100  | 5.34947000  | -2.92216800 |
| C | -0.01554200 | 7.60357700  | -2.91556700 |
| C | -0.18533900 | 7.16719300  | -1.48160400 |
| C | 0.95613000  | 6.52304700  | -3.42242700 |
| H | 1.08037300  | 6.53186100  | -4.51506500 |
| H | 1.94172700  | 6.56780700  | -2.93987800 |
| C | -1.23770700 | 5.63625600  | -3.65577300 |
| H | -1.20351400 | 5.23821200  | -4.67876700 |
| H | -2.08662800 | 5.16230200  | -3.14621400 |

|   |             |             |             |
|---|-------------|-------------|-------------|
| C | -1.31293800 | 7.18541900  | -3.65639700 |
| H | -1.30976800 | 7.58226400  | -4.68084200 |
| H | -2.20890300 | 7.57166900  | -3.15502400 |
| H | 0.48862100  | 4.33752200  | -3.07326300 |
| H | 0.27325000  | 8.65027200  | -3.06494200 |
| C | 0.45521000  | 7.23752700  | 3.01819900  |
| C | -0.87438000 | 7.53644700  | 2.27710700  |
| C | -0.77024700 | 5.28153600  | 2.26131600  |
| C | 0.52778300  | 5.68839200  | 3.00394100  |
| H | 1.31134500  | 7.71195100  | 2.52277600  |
| H | 0.41201700  | 7.62341900  | 4.04591700  |
| H | 1.42107600  | 5.30206500  | 2.49659700  |
| H | 0.52638200  | 5.27919200  | 4.02304900  |
| C | -1.73917400 | 6.36258900  | 2.77014100  |
| H | -2.72361700 | 6.31790100  | 2.28528400  |
| H | -1.86608200 | 6.34830900  | 3.86241500  |
| C | -0.66063600 | 7.13257800  | 0.83945600  |
| C | -0.59598600 | 5.73164400  | 0.83219100  |
| H | -1.26266100 | 8.54917400  | 2.43518000  |
| H | -1.06279600 | 4.23520600  | 2.40174900  |
| C | -0.32188200 | 5.01408400  | -0.33227400 |
| C | -0.45804100 | 7.87665600  | -0.31747400 |
| H | -0.51098100 | 8.96665300  | -0.31206400 |
| C | -0.11584100 | 5.76641700  | -1.48844200 |
| C | 2.84494300  | 0.27623200  | 4.76437200  |
| C | 2.19588100  | -0.45385300 | 3.78101200  |
| C | 0.96980900  | -1.08956700 | 4.04298200  |
| C | 0.41837300  | -0.96168900 | 5.32563800  |
| C | 1.07527400  | -0.23843700 | 6.31388400  |
| C | 2.28831700  | 0.38523300  | 6.03883700  |
| H | 3.79060300  | 0.77177200  | 4.54007400  |
| H | 2.61888500  | -0.53455200 | 2.77490900  |
| H | -0.53059200 | -1.44465300 | 5.55491800  |
| H | 0.63557300  | -0.16015400 | 7.30728400  |
| H | 2.79882200  | 0.95709200  | 6.81202900  |
| C | 0.29302000  | -1.79948500 | 2.95240800  |
| C | -0.98300500 | -2.54601500 | 3.22160500  |
| H | 0.99450700  | -2.32143400 | 2.28437500  |

|   |             |             |            |
|---|-------------|-------------|------------|
| H | -0.04233000 | -0.83109600 | 2.16573100 |
| H | -1.40104400 | -2.95400800 | 2.29122800 |
| H | -0.82815300 | -3.39009000 | 3.91439100 |
| H | -1.74281900 | -1.88896400 | 3.66688000 |
